# Supplementary material
Source: PubMed Central journal article supplement (PMC2860907)
Supplement: JCI40372sd.pdf [file JCI40372sd.pdf]

# **GLRX5 deficiency causes sideroblastic anemia by specifically impairing heme biosynthesis and depleting cytosolic iron in erythroblasts**

**Hong Ye,<sup>1</sup> Suh Young Jeong,<sup>1</sup> Manik C. Ghosh,<sup>1</sup> Gennadiy Kovtunovych,<sup>1</sup> Laura Silvestri,<sup>2</sup> Danilo Ortillo,<sup>3</sup> Naoya Uchida,<sup>4</sup> John Tisdale,<sup>4</sup> Clara Camaschella,<sup>2</sup> and Tracey A. Rouault<sup>1,\*</sup>**

Supplemental data

## **Supplemental Figure 1**

*In situ* hybridization of GLRX5 in adult mouse tissues reveals high expression in cerebellum. The hybridization by anti-sense probe indicates the expression of GLRX5 *in vivo*, whereas hybridization by sense probe is negative control. It shows a higher magnification of the cerebellum, where arrows point to deep cerebellar nuclei.

## **Supplemental Figure 2**

GLRX5 has an additional role in erythropoiesis. **(A)** GLRX5 is highly expressed in erythroblast cells in mouse bone marrow. Mouse bone marrow cells were sorted using Ter119 (for erythroid) and CD11b (for macrophage) coated beads (ref. 50). Ferroportin transcript levels were quantified by qRT-PCR. The order of cell sorting did not affect the results, comparing the two panels. **(B)** GLRX5 protein levels were upregulated (as shown by western blot) during DMSO-induced differentiation of MEL cells. Samples were

collected at 24-72 hours post the induction by 2% DMSO. (C) Hemoglobin level was increased (as shown by Ponceau S staining) after DMSO induction. SOD2 was used as loading control in the western blot. (D) The GLRX5 deficiency could potentially impair the formation of hemoglobin. The GLRX5 oligo-1, which is complementary to the mouse sequence, was used to knockdown mouse GLRX5 in MEL cells. WT, mock and neg were used as negative RNAi controls (as described in Fig. 2 and Fig. 4). All cells were subsequently induced by 2% DMSO three days post-siRNA treatment. Hemoglobin (Hb) level was decreased in the GLRX5 deficient cell that was treated by oligo-1. A hemoglobin protein purified from mouse blood was used as positive control. SOD2 was loading control for western blot.

### **Supplemental Figure 3**

Heme levels were not significantly changed in GLRX5 siRNA treated HeLa S3 cells.

Oligos and controls were as described in Fig. 2.

antisense

sense

cerebellum

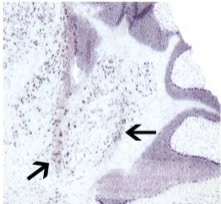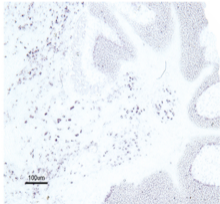

**A**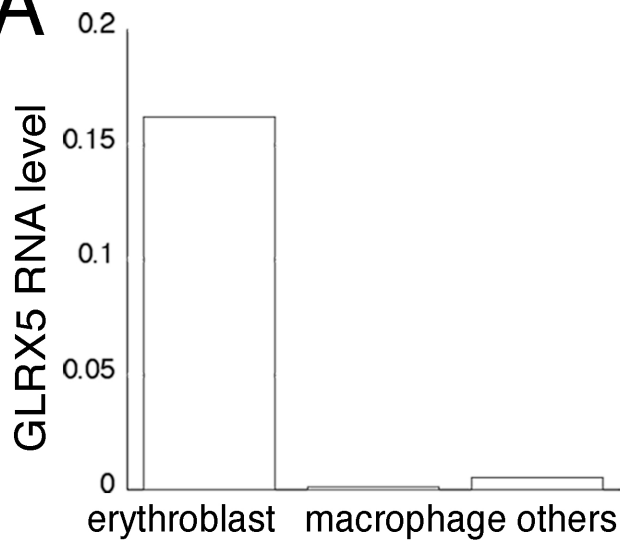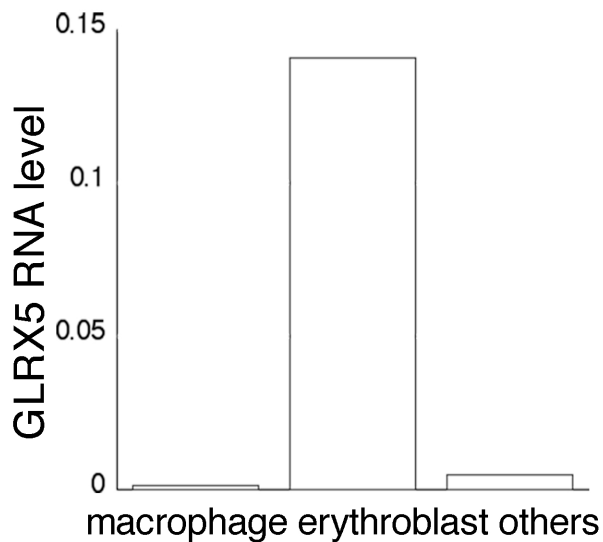**B**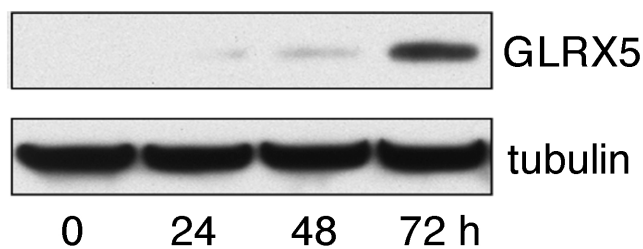**C**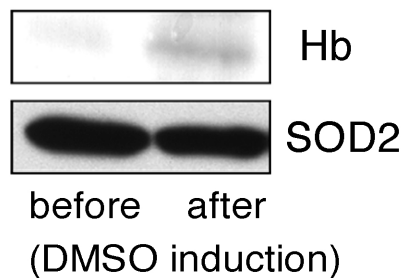**D**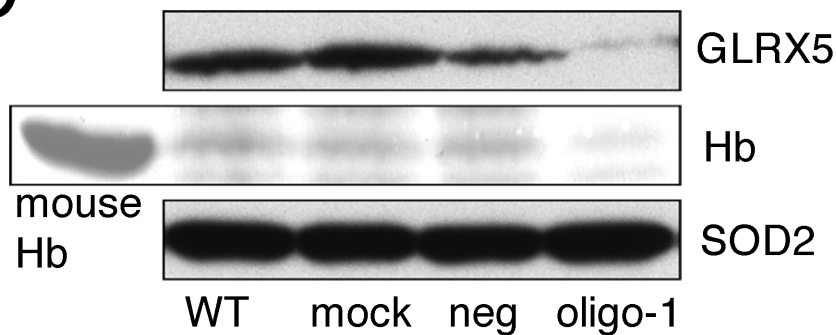

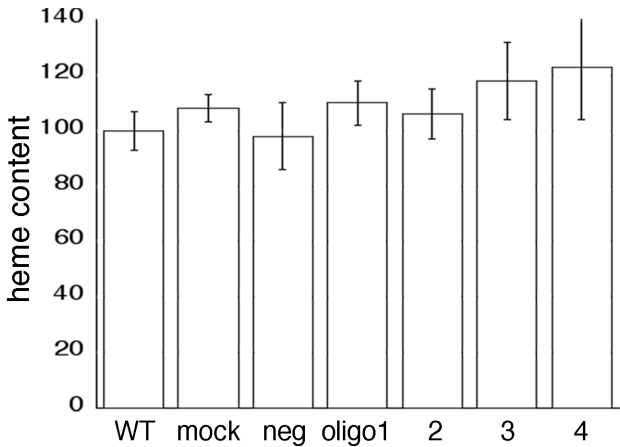

## Supplemental Table 1

Microarray analysis of transcriptome derived from the GLRX5 deficient patient fibroblasts revealed that 2017 genes in the patient cells were significantly altered. Total mRNA was isolated with Trizol reagent (Invitrogen). RNA quality was assessed using the Agilent Bioanalyzer. RNA samples were processed and hybridized on GeneChip Human Genome U133 Plus 2.0 arrays (Affymetrix). The array was operated and data analyzed by the Genomics Core Laboratory at NIDDK. A human fibroblast cell line (ATCC) was used as control. Results represent averages of three replicates. 2-fold change of gene expression was cutoff. P-values less than 0.05 were considered significant. The data were presented in an order from the most decreased gene to the most increased gene.

| Primer use                   | Oligonucleotide         | 5'-3' sequence                        |
|------------------------------|-------------------------|---------------------------------------|
| RT-PCR<br>(mouse)            | mmGRX5-F                | ACTATGCGGCCTACAACGTGCTG               |
|                              | mmGRX5-R                | CAAACCTCGCCGTTGAGGTACACTTG            |
|                              | mmACTIN-F               | CTGAGAGGGGAAATCGTGCGTGAC              |
|                              | mmACTIN-R               | GCTCGTTGCCAATAGTGATGACCTG             |
| RT-PCR<br>(human)            | GRX5-F                  | CAGTTGGACGCGCTGGTGAAGAAG              |
|                              | GRX5-R                  | CAGCACGTTGTAGGCCGCGTAATC              |
|                              | ACTIN-F                 | GCCATGTACGTTGCTATCCAGGCTG             |
|                              | ACTIN-R                 | CGTAGATGGGCACAGTGTGGGTGAC             |
|                              | DMT1-F                  | CACCATGACAGGAACCTATTCTGGC             |
|                              | DMT1-R                  | AACCACTCGGGCAAAGCGTGAC                |
|                              | Dcytb-F                 | ACAGTACATTCCCGCCAGAAGGTG              |
|                              | Dcytb-R                 | GGCTCCTTAGGACGTTTCCATTGC              |
|                              | FTMT-F                  | GAACAGGACGACTGGGAAAGCG                |
|                              | FTMT-R                  | AGAGCGTGCAATTCCAGCAACG                |
|                              | HO1-F                   | CCGCATGAACTCCCTGGAGATG                |
|                              | HO1-R                   | CTGGATGTTGAGCAGGAACGCAG               |
|                              | FTL-F                   | GCGATGATGTGGCTCTGGAAGG                |
|                              | FTL-R                   | TGCATCTTCAGGAGACGCTCGTAG              |
|                              | FPN1-F                  | GAGCCTACTTGTGCCTCCAGATG               |
| FPN1-R                       | TGCAGTCAAAGCCCAGGACAGTC |                                       |
| Clone in<br>pET28            | mGRX5-F                 | ATATGAATTCGCGGGCTCGGGCGCGG            |
|                              | mGRX5-R                 | TTGTCTCGAGTCACTTGGAGTCTTGGTC          |
| Site-directed<br>mutagenesis | K59Q-sense              | GTGGTCTTCCTCCAGGGGACGCCGG             |
|                              | K59Q-antisense          | CCGGCGTCCCCTGGAGGAAGACCAC             |
|                              | C67S-sense              | GAGCAGCCCCAGAGCGGCTTCAGCA             |
|                              | C67S-antisense          | TGCTGAAGCCGCTCTGGGGCTGCTC             |
|                              | T108V-sense             | ACTATTCCAACCTGGCCCGTCATCCCGCAAGTGTACC |
|                              | T108V-antisense         | GGTACACTTGCGGGATGACGGGCCAGTTGGAATAGT  |
|                              | D123N-sense             | CGAGTTTGTAGGGGGCTGTAACATTCTTCTGCAGA   |
|                              | D123N-antisense         | TCTGCAGAAGAATGTTACAGCCCCCTACAACTCG    |

Supplemental Table 2. Sequences of primers used for quantitative RT-PCR, cloning mature sequence of human GRX5 into pET28 vector, and site-directed mutagenesis.

| 1. Probeset | Gene Title                                       | Gene Sym   | p-value(P vs. WT) |
|-------------|--------------------------------------------------|------------|-------------------|
| 1562736_a   | LIM homeobox 9                                   | LHX9       | 5.54E-06          |
| 224588_at   | X (inactive)-specific transcript (non-protein)   | XIST       | 6.16E-07          |
| 227671_at   | X (inactive)-specific transcript (non-protein)   | XIST       | 6.88E-07          |
| 214218_s    | X (inactive)-specific transcript (non-protein)   | XIST       | 8.49E-07          |
| 230147_at   | coagulation factor II (thrombin) receptor-like   | F2RL2      | 1.98E-06          |
| 214587_at   | collagen, type VIII, alpha 1                     | COL8A1     | 2.60E-06          |
| 221728_x    | X (inactive)-specific transcript (non-protein)   | XIST       | 7.03E-05          |
| 226237_at   | MRNA full length insert cDNA clone EURC ---      | ---        | 1.64E-05          |
| 205523_at   | hyaluronan and proteoglycan link protein 1       | HAPLN1     | 0.000257152       |
| 212314_at   | KIAA0746 protein /// serine incorporator 2       | KIAA0746 / | 3.65E-08          |
| 230204_at   | Transcribed locus                                | ---        | 0.000177558       |
| 224590_at   | X (inactive)-specific transcript (non-protein)   | XIST       | 8.08E-06          |
| 205524_s    | hyaluronan and proteoglycan link protein 1       | HAPLN1     | 0.000297437       |
| 209189_at   | v-fos FBJ murine osteosarcoma viral oncogene     | FOS        | 4.21E-07          |
| 1565406_a   | LIM homeobox 9                                   | LHX9       | 1.79E-06          |
| 206326_at   | gastrin-releasing peptide                        | GRP        | 7.28E-05          |
| 203881_s    | dystrophin (muscular dystrophy, Duchenne)        | DMD        | 5.60E-05          |
| 210869_s    | melanoma cell adhesion molecule                  | MCAM       | 0.00034992        |
| 230895_at   | Transcribed locus                                | ---        | 0.000171629       |
| 201843_s    | EGF-containing fibulin-like extracellular matrix | EFEMP1     | 4.77E-06          |
| 225275_at   | EGF-like repeats and discoidin I-like domain     | EDIL3      | 0.0248466         |
| 226244_at   | C-type lectin domain family 14, member A         | CLEC14A    | 0.00012404        |
| 209087_x    | melanoma cell adhesion molecule                  | MCAM       | 0.000341686       |
| 1555778_a   | periostin, osteoblast specific factor            | POSTN      | 3.75E-05          |
| 212311_at   | KIAA0746 protein /// serine incorporator 2       | KIAA0746 / | 1.42E-05          |
| 209875_s    | secreted phosphoprotein 1 (osteopontin, bone     | SPP1       | 5.35E-05          |
| 236044_at   | phosphatidic acid phosphatase type 2 domain      | PPAPDC1A   | 0.000273468       |
| 201842_s    | EGF-containing fibulin-like extracellular matrix | EFEMP1     | 1.41E-05          |
| 228407_at   | signal peptide, CUB domain, EGF-like 3           | SCUBE3     | 2.40E-05          |
| 227705_at   | transcription elongation factor A (SII)-like 7   | TCEAL7     | 4.27E-06          |
| 236029_at   | FAT tumor suppressor homolog 3 (Drosophila)      | FAT3       | 6.02E-05          |
| 239218_at   | phosphodiesterase 1C, calmodulin-dependent       | PDE1C      | 0.00180773        |
| 203184_at   | fibrillin 2 (congenital contractural arachnoid)  | FBN2       | 6.74E-05          |
| 210809_s    | periostin, osteoblast specific factor            | POSTN      | 3.77E-06          |
| 219523_s    | odz, odd Oz/ten-m homolog 3 (Drosophila)         | ODZ3       | 0.000276593       |
| 204529_s    | thymocyte selection-associated high mobility     | TOX        | 1.03E-06          |
| 221933_at   | neuroigin 4, X-linked                            | NLGN4X     | 5.70E-05          |
| 204931_at   | transcription factor 21                          | TCF21      | 0.00045285        |
| 236344_at   | phosphodiesterase 1C, calmodulin-dependent       | PDE1C      | 0.00136532        |
| 204653_at   | transcription factor AP-2 alpha (activating)     | TFAP2A     | 0.00226603        |
| 211340_s    | melanoma cell adhesion molecule                  | MCAM       | 0.000396363       |
| 242488_at   | CDNA FLJ38396 fis, clone FEBRA200795 ---         | ---        | 4.57E-05          |
| 224559_at   | metastasis associated lung adenocarcinoma        | MALAT1     | 0.00168468        |
| 205381_at   | leucine rich repeat containing 17                | LRRC17     | 1.25E-05          |
| 215717_s    | fibrillin 2 (congenital contractural arachnoid)  | FBN2       | 0.0010191         |
| 207379_at   | EGF-like repeats and discoidin I-like domain     | EDIL3      | 0.000440456       |
| 226789_at   | embigin homolog (mouse) pseudogene               | LOC64712   | 0.00047661        |
| 201195_s    | solute carrier family 7 (cationic amino acid)    | SLC7A5     | 0.000186641       |
| 1558643_s   | EGF-like repeats and discoidin I-like domain     | EDIL3      | 0.0011071         |
| 242138_at   | distal-less homeobox 1                           | DLX1       | 0.000605682       |
| 223062_s    | phosphoserine aminotransferase 1                 | PSAT1      | 0.000355409       |
| 203989_x    | coagulation factor II (thrombin) receptor        | F2R        | 8.27E-05          |



|           |                                                |          |             |
|-----------|------------------------------------------------|----------|-------------|
| 1552367_a | scinderin                                      | SCIN     | 0.000133081 |
| 206481_s_ | LIM domain binding 2                           | LDB2     | 7.49E-06    |
| 236734_at | SLIT and NTRK-like family, member 1            | SLITRK1  | 0.000305948 |
| 228640_at | protocadherin 7                                | PCDH7    | 0.00117564  |
| 201650_at | keratin 19                                     | KRT19    | 5.28E-05    |
| 213222_at | phospholipase C, beta 1 (phosphoinositide)     | PLCB1    | 2.04E-05    |
| 220892_s_ | phosphoserine aminotransferase 1               | PSAT1    | 0.000104878 |
| 211981_at | collagen, type IV, alpha 1                     | COL4A1   | 0.00158765  |
| 209763_at | chordin-like 1                                 | CHRD1    | 2.91E-06    |
| 229529_at | transcription factor 21                        | TCF21    | 0.000779233 |
| 207147_at | distal-less homeobox 2                         | DLX2     | 0.000810542 |
| 224589_at | X (inactive)-specific transcript (non-protein) | XIST     | 0.000110039 |
| 225548_at | shroom family member 3                         | SHROOM3  | 0.000120568 |
| 1552365_a | scinderin                                      | SCIN     | 0.000352057 |
| 206825_at | oxytocin receptor                              | OXTR     | 0.00642599  |
| 235171_at | Transcribed locus                              | ---      | 5.18E-05    |
| 205047_s_ | asparagine synthetase                          | ASNS     | 0.000305796 |
| 1559277_a | hypothetical protein FLJ35700                  | FLJ35700 | 0.00172746  |
| 209652_s_ | placental growth factor                        | PGF      | 0.000407512 |
| 205475_at | scrapie responsive protein 1                   | SCRG1    | 3.22E-05    |
| 201694_s_ | early growth response 1                        | EGR1     | 0.000471091 |
| 235591_at | somatostatin receptor 1                        | SSTR1    | 0.000692229 |
| 211276_at | transcription elongation factor A (SII)-like 2 | TCEAL2   | 0.00051435  |
| 201596_x_ | keratin 18                                     | KRT18    | 0.00174456  |
| 237206_at | myocardin                                      | MYOCD    | 0.00136373  |
| 223614_at | chromosome 8 open reading frame 57             | C8orf57  | 6.60E-06    |
| 236088_at | netrin G1                                      | NTNG1    | 0.000239743 |
| 203440_at | cadherin 2, type 1, N-cadherin (neuronal)      | CDH2     | 0.000190002 |
| 227498_at | CDNA FLJ11723 fis, clone HEMBA10053'           | ---      | 0.000691144 |
| 221467_at | melanocortin 4 receptor                        | MC4R     | 0.000555748 |
| 1553972_a | cystathionine-beta-synthase                    | CBS      | 0.000160925 |
| 244623_at | potassium voltage-gated channel, KQT-like      | KCNQ5    | 0.000575537 |
| 228737_at | TOX high mobility group box family member 2    | TOX2     | 6.44E-05    |
| 229963_at | BEX family member 5                            | BEX5     | 2.21E-05    |
| 227889_at | lysophosphatidylcholine acyltransferase 2      | LPCAT2   | 0.00247943  |
| 229339_at | Transcribed locus                              | ---      | 0.00147676  |
| 210004_at | oxidized low density lipoprotein (lectin-like) | OLR1     | 0.000531613 |
| 227404_s_ | Early growth response 1                        | EGR1     | 0.00271994  |
| 228400_at | shroom family member 3                         | SHROOM3  | 0.000142977 |
| 217901_at | Desmoglein 2                                   | DSG2     | 0.00406452  |
| 1552701_a | caspase-1 dominant-negative inhibitor p50      | COP1     | 0.0036708   |
| 201693_s_ | early growth response 1                        | EGR1     | 0.000510276 |
| 205990_s_ | wingless-type MMTV integration site family     | WNT5A    | 0.00379476  |
| 203441_s_ | cadherin 2, type 1, N-cadherin (neuronal)      | CDH2     | 0.00032693  |
| 228582_x_ | Metastasis associated lung adenocarcinoma      | MALAT1   | 0.0068474   |
| 211980_at | collagen, type IV, alpha 1                     | COL4A1   | 0.00169676  |
| 205893_at | neuroigin 1                                    | NLGN1    | 0.00144391  |
| 209631_s_ | G protein-coupled receptor 37 (endothelin)     | GPR37    | 2.54E-05    |
| 237248_at | phosphodiesterase 11A                          | PDE11A   | 5.86E-06    |
| 222668_at | potassium channel tetramerisation domain       | KCTD15   | 0.00109329  |
| 206456_at | gamma-aminobutyric acid (GABA) A receptor      | GABRA5   | 0.0129774   |
| 206918_s_ | copine I                                       | CPNE1    | 2.24E-06    |
| 210794_s_ | maternally expressed 3                         | MEG3     | 0.00067983  |

|           |                                                      |            |             |
|-----------|------------------------------------------------------|------------|-------------|
| 218678_at | nestin                                               | NES        | 4.33E-05    |
| 216379_x_ | CD24 molecule                                        | CD24       | 0.004601    |
| 215175_at | pecanex homolog (Drosophila)                         | PCNX       | 0.000386674 |
| 202834_at | angiotensinogen (serpin peptidase inhibitor)         | AGT        | 0.000371352 |
| 224841_x_ | growth arrest-specific 5                             | GAS5       | 2.69E-07    |
| 209086_x_ | melanoma cell adhesion molecule                      | MCAM       | 0.000613146 |
| 266_s_at  | CD24 molecule                                        | CD24       | 0.00661964  |
| 224741_x_ | growth arrest-specific 5                             | GAS5       | 5.02E-08    |
| 227198_at | AF4/FMR2 family, member 3                            | AFF3       | 0.00081379  |
| 238617_at | CDNA FLJ38181 fis, clone FCBBF100012                 | ---        | 0.000389    |
| 1560253_a | LIM homeobox 9                                       | LHX9       | 0.000198589 |
| 206018_at | forkhead box G1                                      | FOXP1      | 0.00248896  |
| 202363_at | sparc/osteonectin, cwcv and kazal-like domain        | SPOCK1     | 9.34E-05    |
| 208502_s_ | paired-like homeodomain 1                            | PITX1      | 3.67E-05    |
| 200965_s_ | actin binding LIM protein 1                          | ABLIM1     | 9.16E-05    |
| 211538_s_ | heat shock 70kDa protein 2                           | HSPA2      | 0.00634093  |
| 209771_x_ | CD24 molecule                                        | CD24       | 0.00258252  |
| 205515_at | protease, serine, 12 (neurotrypsin, motoprotease)    | PRSS12     | 7.77E-05    |
| 227006_at | protein phosphatase 1, regulatory (inhibitor of      | PPP1R14A   | 0.0101482   |
| 1556583_a | solute carrier family 8 (sodium/calcium exchanger)   | SLC8A1     | 0.0112289   |
| 242100_at | chondroitin sulfate synthase 3                       | CHSY3      | 0.000294289 |
| 229748_x_ | similar to hypothetical protein MGC27019             | LOC100133  | 0.00144537  |
| 205132_at | actin, alpha, cardiac muscle 1                       | ACTC1      | 0.0056546   |
| 203638_s_ | fibroblast growth factor receptor 2 (bacterial)      | FGFR2      | 0.00385216  |
| 212344_at | sulfatase 1                                          | SULF1      | 0.00144115  |
| 216869_at | phosphodiesterase 1C, calmodulin-dependent           | PDE1C      | 3.18E-05    |
| 241879_at | Transcribed locus                                    | ---        | 0.00461726  |
| 227330_x_ | similar to hypothetical protein MGC27019             | LOC100133  | 0.000523107 |
| 232355_at | CDNA FLJ10247 fis, clone HEMBB100070                 | ---        | 0.00541505  |
| 1553705_a | cholinergic receptor, muscarinic 3                   | CHRM3      | 0.0001078   |
| 204337_at | regulator of G-protein signaling 4                   | RGS4       | 0.00204765  |
| 217678_at | solute carrier family 7, (cationic amino acid        | SLC7A11    | 0.000240024 |
| 205594_at | zinc finger protein 652                              | ZNF652     | 8.86E-05    |
| 230388_s_ | hypothetical protein LOC644246                       | LOC644246  | 7.99E-05    |
| 231867_at | odz, odd Oz/ten-m homolog 2 (Drosophila)             | ODZ2       | 3.68E-06    |
| 231227_at | Transcribed locus                                    | ---        | 0.00140694  |
| 208442_s_ | ataxia telangiectasia mutated                        | ATM        | 0.000707613 |
| 209373_at | mal, T-cell differentiation protein-like             | MALL       | 0.000281652 |
| 226279_at | protease, serine, 23                                 | PRSS23     | 9.19E-05    |
| 213425_at | wingless-type MMTV integration site family           | WNT5A      | 0.0122525   |
| 227870_at | neighbor of Punc E11                                 | NOPE       | 0.000670815 |
| 228121_at | CDNA FLJ11812 fis, clone HEMBA100636                 | ---        | 0.000237289 |
| 202997_s_ | lysyl oxidase-like 2 /// ectonucleoside triphosphate | ENTPD4 /// | 0.00287869  |
| 212816_s_ | cystathionine-beta-synthase                          | CBS        | 0.000744778 |
| 1569603_a | Transcribed locus                                    | ---        | 0.00337008  |
| 209921_at | solute carrier family 7, (cationic amino acid        | SLC7A11    | 0.000334379 |
| 242856_at | Transcribed locus, strongly similar to XP_(          | ---        | 0.00768573  |
| 239336_at | Thrombospondin 1                                     | THBS1      | 0.00458493  |
| 235077_at | maternally expressed 3                               | MEG3       | 0.0034597   |
| 235696_at | CDNA clone IMAGE:4837650                             | ---        | 2.02E-05    |
| 1559633_a | cholinergic receptor, muscarinic 3                   | CHRM3      | 0.000824581 |
| 212353_at | sulfatase 1                                          | SULF1      | 0.00315909  |
| 238931_at | methyltransferase 10 domain containing               | METT10D    | 0.000801705 |

|           |                                                |            |             |
|-----------|------------------------------------------------|------------|-------------|
| 228740_at | CDNA clone IMAGE:5276765                       | ---        | 0.00190399  |
| 214803_at | Transcribed locus, weakly similar to NP_6      | ---        | 0.00487012  |
| 208241_at | neuregulin 1                                   | NRG1       | 0.000304664 |
| 213802_at | Transcribed locus, strongly similar to NP_1    | ---        | 3.17E-05    |
| 206070_s_ | EPH receptor A3                                | EPHA3      | 0.000271521 |
| 214043_at | protein tyrosine phosphatase, receptor typ     | PTPRD      | 0.00167825  |
| 219937_at | thyrotropin-releasing hormone degrading        | TRHDE      | 0.00122363  |
| 201859_at | serglycin                                      | SRGN       | 0.00539589  |
| 201858_s_ | serglycin                                      | SRGN       | 0.00712456  |
| 226558_at | similar to CG32820-PA, isoform A               | LOC65307   | 0.000385192 |
| 208650_s_ | CD24 molecule                                  | CD24       | 0.0030149   |
| 223315_at | netrin 4                                       | NTN4       | 0.00311429  |
| 231798_at | noggin                                         | NOG        | 0.0463918   |
| 239598_s_ | lysophosphatidylcholine acyltransferase 2      | LPCAT2     | 9.99E-05    |
| 214156_at | myosin VIIA and Rab interacting protein        | MYRIP      | 0.000116365 |
| 223541_at | hyaluronan synthase 3                          | HAS3       | 0.00146167  |
| 220115_s_ | cadherin 10, type 2 (T2-cadherin)              | CDH10      | 0.000691471 |
| 210372_s_ | tumor protein D52-like 1                       | TPD52L1    | 0.00121533  |
| 241872_at | Transcribed locus                              | ---        | 0.0026217   |
| 223672_at | SH3-domain GRB2-like (endophilin) intera       | SGIP1      | 0.00115015  |
| 238013_at | pleckstrin homology domain containing, fa      | PLEKHA2    | 0.00513899  |
| 202998_s_ | lysyl oxidase-like 2 /// ectonucleoside triph  | ENTPD4 /// | 0.000989267 |
| 238133_at | Transcribed locus                              | ---        | 0.000361469 |
| 219073_s_ | oxysterol binding protein-like 10              | OSBPL10    | 0.000215729 |
| 241473_at | Transcribed locus                              | ---        | 0.00109065  |
| 201261_x_ | biglycan                                       | BGN        | 5.75E-05    |
| 209529_at | phosphatidic acid phosphatase type 2C          | PPAP2C     | 3.20E-05    |
| 227618_at | CDNA FLJ30378 fis, clone BRACE20079f           | ---        | 0.000132163 |
| 240083_at | Transcribed locus                              | ---        | 0.0041749   |
| 218380_at | NLR family, pyrin domain containing 1          | NLRP1      | 0.000695939 |
| 226614_s_ | chromosome 8 open reading frame 13             | C8orf13    | 0.00279062  |
| 213905_x_ | biglycan                                       | BGN        | 0.00142588  |
| 239624_at | Transcribed locus                              | ---        | 0.000121514 |
| 216268_s_ | jagged 1 (Alagille syndrome)                   | JAG1       | 2.25E-05    |
| 206382_s_ | brain-derived neurotrophic factor              | BDNF       | 0.0106648   |
| 202016_at | mesoderm specific transcript homolog (m        | MEST       | 0.021014    |
| 211966_at | collagen, type IV, alpha 2                     | COL4A2     | 0.00429517  |
| 204464_s_ | endothelin receptor type A                     | EDNRA      | 6.18E-05    |
| 243065_at | Transcribed locus                              | ---        | 0.000545646 |
| 228214_at | Transcribed locus                              | ---        | 0.00375323  |
| 205715_at | bone marrow stromal cell antigen 1             | BST1       | 0.000320887 |
| 239367_at | brain-derived neurotrophic factor              | BDNF       | 0.00853212  |
| 203889_at | secretogranin V (7B2 protein)                  | SCG5       | 0.000649098 |
| 227828_s_ | transmembrane protein 166                      | TMEM166    | 0.00299674  |
| 242447_at | hypothetical gene supported by AK091454        | LOC28538   | 0.00263082  |
| 206795_at | coagulation factor II (thrombin) receptor-like | F2RL2      | 0.000681655 |
| 207012_at | matrix metalloproteinase 16 (membrane-in       | MMP16      | 0.000130258 |
| 213496_at | plasticity related gene 1                      | LPPR4      | 8.26E-05    |
| 204338_s_ | regulator of G-protein signaling 4             | RGS4       | 0.00471129  |
| 231361_at | Neuroigin 1                                    | NLGN1      | 0.000311745 |
| 207303_at | phosphodiesterase 1C, calmodulin-depen         | PDE1C      | 0.000198083 |
| 212354_at | sulfatase 1                                    | SULF1      | 0.00219426  |
| 238512_at | Transcribed locus                              | ---        | 0.0004284   |

|           |                                                                   |              |             |
|-----------|-------------------------------------------------------------------|--------------|-------------|
| 211964_at | collagen, type IV, alpha 2                                        | COL4A2       | 0.00191885  |
| 239591_at | Transcribed locus                                                 | ---          | 0.000147757 |
| 230700_at | reticulon 4 receptor-like 1                                       | RTN4RL1      | 0.000356083 |
| 220389_at | coiled-coil domain containing 81                                  | CCDC81       | 0.00125261  |
| 231175_at | chromosome 6 open reading frame 65                                | C6orf65      | 0.00025166  |
| 225864_at | family with sequence similarity 84, member 1                      | FAM84B       | 0.0103338   |
| 1569629_x | similar to Serine/threonine-protein kinase                        | LOC389906    | 0.000757351 |
| 1568878_a | Transcribed locus, strongly similar to XP_001111111               | ---          | 0.00187283  |
| 240382_at | hypothetical protein LOC100131914                                 | LOC100131914 | 0.000384757 |
| 242691_at | CDNA FLJ41369 fis, clone BRCAN200611                              | ---          | 0.0125694   |
| 237423_at | R-spondin family, member 4                                        | RSPO4        | 0.000734538 |
| 231592_at | X (inactive)-specific transcript, antisense                       | TSIX         | 0.000506402 |
| 1555978_s | CDNA FLJ33153 fis, clone UTERU200033                              | ---          | 0.00711423  |
| 209772_s  | ; CD24 molecule                                                   | CD24         | 0.00327599  |
| 201107_s  | ; thrombospondin 1                                                | THBS1        | 0.00474168  |
| 203325_s  | ; collagen, type V, alpha 1                                       | COL5A1       | 0.000276987 |
| 236675_at | replication protein A1, 70kDa                                     | RPA1         | 0.000221684 |
| 212488_at | collagen, type V, alpha 1                                         | COL5A1       | 0.00072081  |
| 226517_at | branched chain aminotransferase 1, cytosolic                      | BCAT1        | 0.000534745 |
| 230290_at | signal peptide, CUB domain, EGF-like 3                            | SCUBE3       | 8.91E-05    |
| 203499_at | EPH receptor A2                                                   | EPHA2        | 0.00267747  |
| 212611_at | deltex 4 homolog (Drosophila)                                     | DTX4         | 0.000186433 |
| 209990_s  | ; gamma-aminobutyric acid (GABA) B receptor                       | GABBR2       | 0.000210418 |
| 212489_at | collagen, type V, alpha 1                                         | COL5A1       | 0.000681789 |
| 222173_s  | ; TBC1 domain family, member 2                                    | TBC1D2       | 2.32E-05    |
| 214596_at | cholinergic receptor, muscarinic 3                                | CHRM3        | 0.000451656 |
| 1555673_a | keratin associated protein 2-1 /// keratin associated protein 2-1 | KAP2.1B ///  | 0.0169396   |
| 234994_at | transmembrane protein 200A                                        | TMEM200A     | 1.90E-05    |
| 204114_at | nidogen 2 (osteonidogen)                                          | NID2         | 0.00111923  |
| 219371_s  | ; Kruppel-like factor 2 (lung)                                    | KLF2         | 0.00404703  |
| 236224_at | Ras-like without CAAX 1                                           | RIT1         | 0.000673507 |
| 243688_at | hypothetical protein LOC285431                                    | LOC285431    | 5.03E-05    |
| 226211_at | maternally expressed 3                                            | MEG3         | 0.0125115   |
| 229557_at | maternally expressed 3                                            | MEG3         | 0.0125719   |
| 1568868_a | cytochrome P450, family 27, subfamily C, member 1                 | CYP27C1      | 0.0031025   |
| 235442_at | chromosome X open reading frame 56                                | CXorf56      | 0.000768091 |
| 209871_s  | ; amyloid beta (A4) precursor protein-binding protein 1           | APBA2        | 6.70E-05    |
| 218660_at | dysferlin, limb girdle muscular dystrophy 2                       | DYSF         | 0.00032045  |
| 206197_at | non-metastatic cells 5, protein expressed in                      | NME5         | 0.00112545  |
| 210858_x  | ; ataxia telangiectasia mutated                                   | ATM          | 0.0020914   |
| 228949_at | G protein-coupled receptor 177                                    | GPR177       | 9.43E-05    |
| 236300_at | CDNA FLJ37884 fis, clone BRSTN201245                              | ---          | 0.000684478 |
| 205581_s  | ; nitric oxide synthase 3 (endothelial cell)                      | NOS3         | 0.000784329 |
| 237465_at | ubiquitin specific peptidase 53                                   | USP53        | 0.000393369 |
| 209098_s  | ; jagged 1 (Alagille syndrome)                                    | JAG1         | 5.87E-05    |
| 224763_at | Ribosomal protein L37                                             | RPL37        | 0.000264538 |
| 203217_s  | ; ST3 beta-galactoside alpha-2,3-sialyltransferase                | ST3GAL5      | 0.00104915  |
| 226733_at | 6-phosphofructo-2-kinase/fructose-2,6-bisphosphate phosphatase    | PFKFB2       | 2.07E-05    |
| 223435_s  | ; protocadherin alpha 9 /// protocadherin alpha 9                 | PCDHA1 ///   | 0.00121022  |
| 230214_at | murine retrovirus integration site 1 homolog                      | MRV11        | 3.76E-05    |
| 204517_at | peptidylprolyl isomerase C (cyclophilin C)                        | PPIC         | 0.00204242  |
| 235309_at | Ribosomal protein S15a                                            | RPS15A       | 0.000417974 |
| 239297_at | chromosome 8 open reading frame 79                                | C8orf79      | 0.000871263 |

|             |                                               |           |             |
|-------------|-----------------------------------------------|-----------|-------------|
| 228537_at   | GLI-Kruppel family member GLI2                | GLI2      | 0.000964301 |
| 209099_x_s  | jagged 1 (Alagille syndrome)                  | JAG1      | 2.76E-06    |
| 208651_x_s  | CD24 molecule                                 | CD24      | 0.00918148  |
| 219270_at   | ChaC, cation transport regulator homolog      | CHAC1     | 0.0102706   |
| 228221_at   | solute carrier family 44, member 3            | SLC44A3   | 2.18E-05    |
| 212732_at   | maternally expressed 3                        | MEG3      | 0.0357738   |
| 209016_s_s  | keratin 7                                     | KRT7      | 0.0209149   |
| 212256_at   | UDP-N-acetyl-alpha-D-galactosamine:poly       | GALNT10   | 0.00143238  |
| 227929_at   | CDNA clone IMAGE:5277945                      | ---       | 0.000541212 |
| 232861_at   | pyruvate dehydrogenase phosphatase iso        | PDP2      | 0.00250399  |
| 228645_at   | small nucleolar RNA host gene (non-prote      | SNHG9     | 0.000615775 |
| 228360_at   | hypothetical protein LOC130576                | LOC130576 | 0.0008511   |
| 218145_at   | tribbles homolog 3 (Drosophila)               | TRIB3     | 0.000544417 |
| 221152_at   | collagen, type VIII, alpha 1                  | COL8A1    | 8.86E-05    |
| 222664_at   | potassium channel tetramerisation domain      | KCTD15    | 0.00119878  |
| 235367_at   | myopalladin                                   | MYPN      | 0.001998    |
| 200606_at   | desmoplakin                                   | DSP       | 0.000149349 |
| 203381_s_s  | apolipoprotein E                              | APOE      | 0.000160038 |
| 227497_at   | CDNA FLJ11723 fis, clone HEMBA100531          | ---       | 0.000364478 |
| 231202_at   | Aldehyde dehydrogenase 1 family, member       | ALDH1L2   | 0.000822907 |
| 201761_at   | methylenetetrahydrofolate dehydrogenase       | MTHFD2    | 4.32E-06    |
| 231183_s_s  | Jagged 1 (Alagille syndrome)                  | JAG1      | 0.00014303  |
| 225240_s_s  | musashi homolog 2 (Drosophila)                | MSI2      | 0.00176813  |
| 208078_s_s  | SNF1-like kinase                              | SNF1LK    | 0.00232061  |
| 227875_at   | kelch-like 13 (Drosophila)                    | KLHL13    | 0.00045221  |
| 205624_at   | carboxypeptidase A3 (mast cell)               | CPA3      | 0.000563859 |
| 230498_at   | melanin-concentrating hormone receptor        | MCHR1     | 0.000818801 |
| 226210_s_s  | maternally expressed 3                        | MEG3      | 0.014719    |
| 213524_s_s  | G0/G1switch 2                                 | G0S2      | 0.00282556  |
| 202254_at   | Signal-induced proliferation-associated 1     | SIPA1L1   | 0.00147772  |
| 222315_at   | Transcribed locus                             | ---       | 0.00285927  |
| 203608_at   | aldehyde dehydrogenase 5 family, member       | ALDH5A1   | 2.65E-05    |
| 219700_at   | plexin domain containing 1                    | PLXDC1    | 0.00144845  |
| 209765_at   | ADAM metallopeptidase domain 19 (meltr        | ADAM19    | 0.00724169  |
| 228238_at   | growth arrest-specific 5                      | GAS5      | 0.00182189  |
| 228632_at   | CDNA FLJ37243 fis, clone BRAMY200431          | ---       | 0.00493527  |
| 1567575_a   | Trapped 3' terminal exon, clone C2C4          | ---       | 0.0360154   |
| 216933_x_s  | adenomatous polyposis coli                    | APC       | 0.00456111  |
| 232535_at   | MRNA; cDNA DKFZp434L201 (from clone           | ---       | 0.000141103 |
| 202458_at   | protease, serine, 23                          | PRSS23    | 1.55E-05    |
| 219791_s_s  | Nbla00301                                     | NBLA00301 | 0.000304044 |
| 212099_at   | ras homolog gene family, member B             | RHOB      | 0.00533292  |
| 230560_at   | syntaxin binding protein 6 (amisyn)           | STXBP6    | 0.0115352   |
| 206595_at   | cystatin E/M                                  | CST6      | 0.0142301   |
| 202311_s_s  | collagen, type I, alpha 1                     | COL1A1    | 0.00274769  |
| 206373_at   | Zic family member 1 (odd-paired homolog       | ZIC1      | 0.00193157  |
| 1555788_a   | tribbles homolog 3 (Drosophila)               | TRIB3     | 0.000104561 |
| 230611_at   | synaptophysin-like 2                          | SYPL2     | 0.00300849  |
| 203786_s_s  | tumor protein D52-like 1                      | TPD52L1   | 0.00390304  |
| 207528_s_s  | solute carrier family 7, (cationic amino acid | SLC7A11   | 0.000629414 |
| 1555976_s_s | CDNA FLJ33153 fis, clone UTERU200031          | ---       | 0.00873877  |
| 219694_at   | family with sequence similarity 105, member   | FAM105A   | 6.80E-05    |
| 207419_s_s  | ras-related C3 botulinum toxin substrate 2    | RAC2      | 0.0115297   |

|            |                                                 |             |             |
|------------|-------------------------------------------------|-------------|-------------|
| 238129_s_  | ---                                             | ---         | 0.00333693  |
| 241902_at  | mohawk homeobox                                 | MKX         | 8.11E-06    |
| 236636_at  | Transcribed locus                               | ---         | 0.00943119  |
| 211005_at  | linker for activation of T cells /// spinster h | LAT /// SPN | 3.40E-05    |
| 236123_at  | Suppression of tumorigenicity 7 like            | ST7L        | 0.00145662  |
| 242239_at  | CDNA clone IMAGE:5314281                        | ---         | 0.00039481  |
| 213506_at  | coagulation factor II (thrombin) receptor-li    | F2RL1       | 0.00144501  |
| 226415_at  | KIAA1576 protein                                | KIAA1576    | 0.0026648   |
| 205439_at  | glutathione S-transferase theta 2               | GSTT2       | 0.00158021  |
| 1569311_a  | Transcribed locus, weakly similar to XP_0       | ---         | 0.000300731 |
| 203159_at  | glutaminase                                     | GLS         | 0.00214915  |
| 225285_at  | branched chain aminotransferase 1, cytos        | BCAT1       | 1.09E-05    |
| 209082_s_  | collagen, type XVIII, alpha 1                   | COL18A1     | 0.00894283  |
| 1561615_s_ | solute carrier family 8 (sodium/calcium ex      | SLC8A1      | 0.00386922  |
| 229566_at  | similar to WDNM1-like protein                   | LOC645636   | 2.37E-05    |
| 209287_s_  | CDC42 effector protein (Rho GTPase bind         | CDC42EP3    | 0.000812881 |
| 204463_s_  | endothelin receptor type A                      | EDNRA       | 0.000191836 |
| 228297_at  | Transcribed locus                               | ---         | 0.00730662  |
| 213030_s_  | plexin A2                                       | PLXNA2      | 0.000355889 |
| 205493_s_  | dihydropyrimidinase-like 4                      | DPYSL4      | 0.00923372  |
| 204339_s_  | regulator of G-protein signaling 4              | RGS4        | 0.00231032  |
| 213603_s_  | ras-related C3 botulinum toxin substrate 2      | RAC2        | 0.00700589  |
| 224224_s_  | phosphodiesterase 11A                           | PDE11A      | 0.00041178  |
| 213135_at  | T-cell lymphoma invasion and metastasis         | TIAM1       | 0.00781281  |
| 215483_at  | A kinase (PRKA) anchor protein (yotiao) 9       | AKAP9       | 0.00456299  |
| 209120_at  | nuclear receptor subfamily 2, group F, me       | NR2F2       | 0.00839252  |
| 218729_at  | latexin                                         | LXN         | 0.00022474  |
| 223629_at  | protocadherin beta 5                            | PCDHB5      | 0.000110326 |
| 244726_at  | Transcribed locus                               | ---         | 0.000453372 |
| 206924_at  | interleukin 11                                  | IL11        | 0.0119882   |
| 225168_at  | FERM domain containing 4A                       | FRMD4A      | 0.00720211  |
| 224724_at  | sulfatase 2                                     | SULF2       | 0.00322664  |
| 213519_s_  | laminin, alpha 2 (merosin, congenital mus       | LAMA2       | 9.35E-05    |
| 240402_at  | kin of IRRE like 3 (Drosophila)                 | KIRREL3     | 0.0167378   |
| 225163_at  | FERM domain containing 4A                       | FRMD4A      | 0.00428515  |
| 241752_at  | solute carrier family 8 (sodium/calcium ex      | SLC8A1      | 0.0127006   |
| 239043_at  | zinc finger protein 404                         | ZNF404      | 0.00186648  |
| 1565743_a  | CDNA FLJ37648 fis, clone BRHIP200053:---        | ---         | 0.00247766  |
| 214293_at  | Septin 11                                       | 11-Sep      | 0.000595458 |
| 209710_at  | GATA binding protein 2                          | GATA2       | 5.31E-05    |
| 203397_s_  | UDP-N-acetyl-alpha-D-galactosamine:pol          | GALNT3      | 0.00820309  |
| 214452_at  | branched chain aminotransferase 1, cytos        | BCAT1       | 0.00252425  |
| 220296_at  | UDP-N-acetyl-alpha-D-galactosamine:pol          | GALNT10     | 0.00100194  |
| 209031_at  | cell adhesion molecule 1                        | CADM1       | 0.00456704  |
| 228049_x_  | Transcribed locus, strongly similar to XP_      | ---         | 0.0130221   |
| 244503_at  | Transcribed locus                               | ---         | 0.0389328   |
| 1555977_a  | CDNA FLJ33153 fis, clone UTERU200033:---        | ---         | 0.00124303  |
| 206638_at  | 5-hydroxytryptamine (serotonin) receptor        | HTR2B       | 0.0183522   |
| 206343_s_  | neuregulin 1                                    | NRG1        | 0.00941007  |
| 236738_at  | Similar to LOC166075                            | LOC401095   | 0.00123422  |
| 203811_s_  | DnaJ (Hsp40) homolog, subfamily B, mem          | DNAJB4      | 0.00308668  |
| 226591_at  | CDNA FLJ33569 fis, clone BRAMY20103'            | ---         | 0.00712602  |
| 232231_at  | runt-related transcription factor 2             | RUNX2       | 0.000155609 |

|            |                                                |           |             |
|------------|------------------------------------------------|-----------|-------------|
| 209870_s_; | amyloid beta (A4) precursor protein-bindin     | APBA2     | 3.04E-05    |
| 222272_x_; | scinderin                                      | SCIN      | 0.000424098 |
| 219260_s_; | chromosome 17 open reading frame 81            | C17orf81  | 0.00162739  |
| 223578_x_; | metastasis associated lung adenocarcinor       | MALAT1    | 0.0246916   |
| 1558430_a  | CDNA FLJ36648 fis, clone UTERU100013           | ---       | 0.000648866 |
| 225136_at  | pleckstrin homology domain containing, fa      | PLEKHA2   | 0.00821285  |
| 201064_s_; | poly(A) binding protein, cytoplasmic 4 (ind    | PABPC4    | 0.00279775  |
| 211071_s_; | myeloid/lymphoid or mixed-lineage leuken       | MLLT11    | 0.000182562 |
| 216147_at  | MRNA; cDNA DKFZp761L23121 (from clc            | ---       | 0.0283949   |
| 204364_s_; | receptor accessory protein 1                   | REEP1     | 3.48E-05    |
| 211679_x_; | gamma-aminobutyric acid (GABA) B recep         | GABBR2    | 0.000211993 |
| 227798_at  | SMAD family member 1                           | SMAD1     | 0.00109891  |
| 230071_at  | septin 11                                      | 11-Sep    | 0.0152236   |
| 203382_s_; | apolipoprotein E                               | APOE      | 0.00134314  |
| 211042_x_; | melanoma cell adhesion molecule                | MCAM      | 0.000247871 |
| 210220_at  | frizzled homolog 2 (Drosophila)                | FZD2      | 6.33E-05    |
| 222931_s_; | threonine synthase-like 1 (S. cerevisiae)      | THNSL1    | 0.000583554 |
| 230449_x_; | Transcribed locus                              | ---       | 0.00110346  |
| 219179_at  | dapper, antagonist of beta-catenin, homolo     | DACT1     | 0.00241645  |
| 223627_at  | mex-3 homolog B (C. elegans)                   | MEX3B     | 0.00258605  |
| 202743_at  | phosphoinositide-3-kinase, regulatory sub      | PIK3R3    | 0.00561588  |
| 224550_s_; | murine retrovirus integration site 1 homolo    | MRV11     | 0.000954119 |
| 1564339_a  | cholinergic receptor, muscarinic 3             | CHRM3     | 0.00039689  |
| 220147_s_; | family with sequence similarity 60, membe      | FAM60A    | 0.00133698  |
| 223795_at  | tetraspanin 10                                 | TSPAN10   | 0.00349036  |
| 227666_at  | doublecortin-like kinase 2                     | DCLK2     | 0.00428373  |
| 219090_at  | solute carrier family 24 (sodium/potassium     | SLC24A3   | 0.00376293  |
| 208476_s_; | FERM domain containing 4A                      | FRMD4A    | 0.0125492   |
| 1557197_a  | lectin, galactoside-binding, soluble, 3        | LGALS3    | 0.0134151   |
| 220786_s_; | solute carrier family 38, member 4             | SLC38A4   | 0.000166422 |
| 229843_at  | Family with sequence similarity 82, memb       | FAM82B    | 1.38E-05    |
| 205010_at  | guanine nucleotide binding protein-like 3 (    | GNL3L     | 0.00051665  |
| 242751_at  | Transcribed locus                              | ---       | 0.00042944  |
| 1558508_a  | chromosome 1 open reading frame 53             | C1orf53   | 0.000587727 |
| 206118_at  | signal transducer and activator of transcrip   | STAT4     | 0.000891315 |
| 205321_at  | eukaryotic translation initiation factor 2, su | EIF2S3    | 0.0204818   |
| 200845_s_; | peroxiredoxin 6                                | PRDX6     | 1.65E-05    |
| 208228_s_; | fibroblast growth factor receptor 2 (bacteri   | FGFR2     | 0.00426039  |
| 220167_s_; | TP53TG3 protein /// similar to TP53TG3 p       | LOC729354 | 0.00125688  |
| 202796_at  | synaptopodin                                   | SYNPO     | 0.00558512  |
| 1560048_a  | CDNA FLJ30026 fis, clone 3NB69200112           | ---       | 0.000830972 |
| 205832_at  | carboxypeptidase A4                            | CPA4      | 2.28E-05    |
| 241883_x_; | ---                                            | ---       | 0.0133536   |
| 218625_at  | neuritin 1                                     | NRN1      | 3.71E-06    |
| 203810_at  | DnaJ (Hsp40) homolog, subfamily B, merr        | DNAJB4    | 0.00445441  |
| 231467_at  | Transcribed locus                              | ---       | 0.0037524   |
| 1557779_a  | Homo sapiens, clone IMAGE:4400004, ml          | ---       | 0.0184072   |
| 1560741_a  | small nuclear ribonucleoprotein polypeptic     | SNRPN     | 0.0050358   |
| 237075_at  | ---                                            | ---       | 0.000799447 |
| 1568604_a  | Ca2+-dependent secretion activator             | CADPS     | 0.00203251  |
| 227282_at  | protocadherin 19                               | PCDH19    | 0.000968102 |
| 239153_at  | hypothetical gene supported by AK123741        | FLJ41747  | 0.00437761  |
| 219506_at  | chromosome 1 open reading frame 54             | C1orf54   | 0.000673613 |

|            |                                                                                           |           |             |
|------------|-------------------------------------------------------------------------------------------|-----------|-------------|
| 226134_s_  | Transcribed locus                                                                         | ---       | 9.46E-05    |
| 203238_s_  | Notch homolog 3 (Drosophila)                                                              | NOTCH3    | 0.000704296 |
| 1560359_a  | Pelota homolog (Drosophila)                                                               | PELO      | 0.00121337  |
| 228507_at  | CDNA FLJ37884 fis, clone BRSTN201245                                                      | ---       | 0.0011863   |
| 204639_at  | adenosine deaminase                                                                       | ADA       | 0.00766183  |
| 244524_at  | Transcribed locus                                                                         | ---       | 0.00136168  |
| 214741_at  | zinc finger protein 131                                                                   | ZNF131    | 0.00113833  |
| 229158_at  | WNK lysine deficient protein kinase 4                                                     | WNK4      | 9.38E-05    |
| 1553275_s_ | ---                                                                                       | ---       | 0.00803195  |
| 1561689_a  | Transcribed locus                                                                         | ---       | 0.000379147 |
| 1558794_a  | Hypothetical protein LOC728190                                                            | LOC728190 | 0.000339805 |
| 242260_at  | Matrin 3                                                                                  | MATR3     | 0.00220488  |
| 223854_at  | protocadherin beta 10                                                                     | PCDHB10   | 0.0167487   |
| 217967_s_  | family with sequence similarity 129, member 1                                             | FAM129A   | 0.0318524   |
| 210674_s_  | protocadherin alpha 9 /// protocadherin alpha 9                                           | PCDA1 /// | 0.00378179  |
| 230906_at  | UDP-N-acetyl-alpha-D-galactosamine:polyphosphate 4-epimerase                              | GALNT10   | 0.00115195  |
| 225220_at  | small nucleolar RNA host gene (non-protein coding)                                        | SNHG8     | 0.000225119 |
| 232955_at  | hypothetical LOC440200                                                                    | FLJ41170  | 0.0134435   |
| 222809_x_  | chromosome 14 open reading frame 65                                                       | C14orf65  | 0.000471835 |
| 228310_at  | enabled homolog (Drosophila)                                                              | ENAH      | 0.00184187  |
| 213640_s_  | lysyl oxidase                                                                             | LOX       | 0.000558007 |
| 229189_s_  | CDNA FLJ90295 fis, clone NT2RP200024                                                      | ---       | 0.00767527  |
| 230737_s_  | patched domain containing 3 pseudogene                                                    | LOC387643 | 0.000906829 |
| 1558964_a  | FAT tumor suppressor homolog 3 (Drosophila)                                               | FAT3      | 0.000951332 |
| 214436_at  | F-box and leucine-rich repeat protein 2                                                   | FBXL2     | 0.00170351  |
| 243134_at  | Transcribed locus                                                                         | ---       | 0.0173384   |
| 204079_at  | tyrosylprotein sulfotransferase 2                                                         | TPST2     | 0.00176298  |
| 219829_at  | integrin beta 1 binding protein (melusin) 2                                               | ITGB1BP2  | 1.16E-05    |
| 218724_s_  | TGFB-induced factor homeobox 2                                                            | TGIF2     | 0.00268879  |
| 243087_at  | WD repeat domain 63                                                                       | WDR63     | 0.00249173  |
| 1568765_a  | serpin peptidase inhibitor, clade E (nexin), member 1                                     | SERPINE1  | 0.00592745  |
| 1557224_a  | CDNA FLJ30981 fis, clone HHDPC200024                                                      | ---       | 0.000247861 |
| 212667_at  | secreted protein, acidic, cysteine-rich (osteocalcin)                                     | SPARC     | 0.00050079  |
| 200962_at  | ribosomal protein L31                                                                     | RPL31     | 0.00531492  |
| 243564_at  | phosphodiesterase 1C, calmodulin-dependent                                                | PDE1C     | 0.0015511   |
| 232544_at  | CDNA FLJ11572 fis, clone HEMBA100337                                                      | ---       | 0.00433428  |
| 209433_s_  | phosphoribosyl pyrophosphate amidotransferase                                             | PPAT      | 0.0056082   |
| 224002_s_  | FK506 binding protein 7                                                                   | FKBP7     | 0.000732305 |
| 207357_s_  | UDP-N-acetyl-alpha-D-galactosamine:polyphosphate 4-epimerase                              | GALNT10   | 0.0145784   |
| 222787_s_  | transmembrane protein 106B                                                                | TMEM106E  | 6.19E-05    |
| 229441_at  | Protease, serine, 23                                                                      | PRSS23    | 0.00101375  |
| 218974_at  | sine oculis binding protein homolog (Drosophila)                                          | SOBP      | 0.00075915  |
| 213110_s_  | collagen, type IV, alpha 5 (Alport syndrome)                                              | COL4A5    | 0.00351878  |
| 230083_at  | ubiquitin specific peptidase 53                                                           | USP53     | 0.00507306  |
| 235518_at  | solute carrier family 8 (sodium/calcium exchanger)                                        | SLC8A1    | 0.0229971   |
| 1552867_a  | ---                                                                                       | ---       | 0.00527235  |
| 1555777_a  | periostin, osteoblast specific factor                                                     | POSTN     | 7.25E-05    |
| 225167_at  | FERM domain containing 4A                                                                 | FRMD4A    | 0.00442128  |
| 205590_at  | RAS guanyl releasing protein 1 (calcium and G-protein coupled receptor signaling pathway) | RASGRP1   | 0.00189141  |
| 1554743_x  | PMS1 postmeiotic segregation increased                                                    | PMS1      | 5.48E-05    |
| 1563414_a  | Full length insert cDNA clone YW28F05                                                     | ---       | 0.0119895   |
| 229092_at  | nuclear receptor subfamily 2, group F, member 2                                           | NR2F2     | 0.000285392 |
| 215073_s_  | nuclear receptor subfamily 2, group F, member 2                                           | NR2F2     | 0.0136849   |



|           |                                              |            |             |
|-----------|----------------------------------------------|------------|-------------|
| 224364_s_ | peptidylprolyl isomerase (cyclophilin)-like  | PPIL3      | 9.79E-05    |
| 219636_s_ | armadillo repeat containing 9                | ARMC9      | 0.00727078  |
| 211330_s_ | hemochromatosis                              | HFE        | 0.00615076  |
| 217427_s_ | HIR histone cell cycle regulation defective  | HIRA       | 0.0104472   |
| 236321_at | ---                                          | ---        | 0.000541527 |
| 222833_at | lysophosphatidylcholine acyltransferase 2    | LPCAT2     | 0.000968836 |
| 237305_at | Transcribed locus                            | ---        | 0.00169395  |
| 226995_at | Chromosome 21 open reading frame 86          | C21orf86   | 0.00231094  |
| 228255_at | amyotrophic lateral sclerosis 2 (juvenile) c | ALS2CR4    | 6.46E-05    |
| 209119_x_ | nuclear receptor subfamily 2, group F, me    | NR2F2      | 0.0138491   |
| 235236_at | Transcribed locus                            | ---        | 0.0402      |
| 238774_at | ---                                          | ---        | 0.00977583  |
| 217430_x_ | collagen, type I, alpha 1                    | COL1A1     | 0.00205736  |
| 231829_at | virus-induced signaling adapter              | VISA       | 0.00731946  |
| 212812_at | CDNA: FLJ22642 fis, clone HSI06970           | ---        | 0.00225567  |
| 218472_s_ | pelota homolog (Drosophila)                  | PELO       | 0.00141667  |
| 241788_x_ | Transcribed locus                            | ---        | 0.00224935  |
| 225237_s_ | musashi homolog 2 (Drosophila)               | MSI2       | 0.00134055  |
| 235228_at | coiled-coil domain containing 85A            | CCDC85A    | 0.0175704   |
| 224767_at | Ribosomal protein L37                        | RPL37      | 5.44E-06    |
| 206103_at | ras-related C3 botulinum toxin substrate 3   | RAC3       | 0.00509197  |
| 221139_s_ | cysteine sulfinic acid decarboxylase         | CSAD       | 0.00259053  |
| 201162_at | insulin-like growth factor binding protein 7 | IGFBP7     | 0.00153563  |
| 211106_at | ---                                          | ---        | 0.000387377 |
| 222750_s_ | steroid 5 alpha-reductase 3                  | SRD5A3     | 0.00100605  |
| 211681_s_ | PDZ and LIM domain 5                         | PDLIM5     | 0.00928287  |
| 212774_at | zinc finger protein 238                      | ZNF238     | 0.00107222  |
| 233555_s_ | sulfatase 2                                  | SULF2      | 0.036308    |
| 210749_x_ | discoidin domain receptor tyrosine kinase    | DDR1       | 0.00263542  |
| 221974_at | small nuclear ribonucleoprotein polypeptic   | SNRPN      | 0.00195389  |
| 243599_at | Transcribed locus                            | ---        | 0.0310228   |
| 232369_at | Clone IMAGE:119716, mRNA sequence            | ---        | 0.00846396  |
| 205359_at | A kinase (PRKA) anchor protein 6             | AKAP6      | 0.000289145 |
| 205939_at | cytochrome P450, family 3, subfamily A, p    | CYP3A7     | 0.00564182  |
| 239008_at | CDNA clone IMAGE:4328048                     | ---        | 3.07E-05    |
| 228618_at | platelet endothelial aggregation receptor 1  | PEAR1      | 3.74E-05    |
| 209576_at | guanine nucleotide binding protein (G prot   | GNAI1      | 0.00157956  |
| 216975_x_ | neuronal PAS domain protein 1                | NPAS1      | 0.00103505  |
| 237183_at | UDP-N-acetyl-alpha-D-galactosamine:poly      | GALNT5     | 0.0213478   |
| 212686_at | protein phosphatase 1H (PP2C domain cc       | PPM1H      | 0.00176301  |
| 230935_at | ---                                          | ---        | 0.000113786 |
| 215767_at | zinc finger protein 804A                     | ZNF804A    | 0.001373    |
| 1556102_x | hypothetical protein LOC286434               | LOC286434  | 0.00106986  |
| 204506_at | protein phosphatase 3 (formerly 2B), regu    | PPP3R1 /// | 0.0226133   |
| 222347_at | hypothetical protein LOC644450               | LOC644450  | 0.000902555 |
| 57588_at  | solute carrier family 24 (sodium/potassium   | SLC24A3    | 0.00383921  |
| 203157_s_ | glutaminase                                  | GLS        | 0.00242084  |
| 233528_s_ | TBC1 domain family, member 10A /// hypc      | LOC652968  | 0.0111175   |
| 235061_at | protein phosphatase 1K (PP2C domain cc       | PPM1K      | 0.0364727   |
| 205943_at | tryptophan 2,3-dioxygenase                   | TDO2       | 0.00588613  |
| 239302_s_ | MRNA; cDNA DKFZp686P18215 (from clc          | ---        | 0.000758917 |
| 213238_at | ATPase, class V, type 10D                    | ATP10D     | 0.000121319 |
| 1554689_a | neuregulin 4, X-linked                       | NLGN4X     | 0.000494173 |

|            |                                               |             |             |
|------------|-----------------------------------------------|-------------|-------------|
| 226523_at  | Transgelin                                    | TAGLN       | 0.0096339   |
| 204897_at  | prostaglandin E receptor 4 (subtype EP4)      | PTGER4      | 0.00345902  |
| 219629_at  | family with sequence similarity 118, memb     | FAM118A     | 1.57E-05    |
| 242423_x_s | CDNA clone IMAGE:6576427                      | ---         | 0.0104842   |
| 242396_at  | Similar to hCG1774772                         | LOC100130   | 0.00651973  |
| 243444_at  | Transcribed locus                             | ---         | 0.000476481 |
| 1564639_a  | Hypothetical protein LOC441528                | LOC389906   | 0.0187659   |
| 205934_at  | phospholipase C-like 1                        | PLCL1       | 0.00195141  |
| 206993_at  | ATP synthase, H+ transporting, mitochondr     | ATP5S       | 0.000128943 |
| 201468_s_s | NAD(P)H dehydrogenase, quinone 1              | NQO1        | 0.00241638  |
| 238546_at  | solute carrier family 8 (sodium/calcium ex    | SLC8A1      | 0.0199854   |
| 230933_at  | Destrin (actin depolymerizing factor)         | DSTN        | 0.00331696  |
| 212699_at  | secretory carrier membrane protein 5          | SCAMP5      | 0.00037326  |
| 222288_at  | Transcribed locus, weakly similar to NP_0     | ---         | 0.0107408   |
| 229518_at  | family with sequence similarity 46, membe     | FAM46B      | 0.00649599  |
| 214954_at  | sushi domain containing 5                     | SUSD5       | 0.00201664  |
| 239503_at  | CDNA clone IMAGE:5301910                      | ---         | 0.00519016  |
| 208396_s_s | phosphodiesterase 1A, calmodulin-depend       | PDE1A       | 0.0204547   |
| 221016_s_s | transcription factor 7-like 1 (T-cell specifi | TCF7L1      | 0.00402175  |
| 227863_at  | cathepsin D                                   | CTSD        | 0.000156712 |
| 219956_at  | UDP-N-acetyl-alpha-D-galactosamine:poly       | GALNT6      | 0.0105223   |
| 223038_s_s | family with sequence similarity 60, membe     | FAM60A      | 0.000262792 |
| 221823_at  | chromosome 5 open reading frame 30            | C5orf30     | 0.00305751  |
| 208025_s_s | high mobility group AT-hook 2                 | HMGA2       | 0.0100089   |
| 214095_at  | serine hydroxymethyltransferase 2 (mitoch     | SHMT2       | 0.00101638  |
| 213995_at  | ATP synthase, H+ transporting, mitochondr     | ATP5S       | 5.79E-06    |
| 205646_s_s | paired box 6                                  | PAX6        | 0.00326232  |
| 1557275_a  | CDNA FLJ20031 fis, clone ADSU02180            | ---         | 0.0271313   |
| 214657_s_s | Trophoblast-derived noncoding RNA             | TncRNA      | 0.00307797  |
| 241722_x_s | Transcribed locus                             | ---         | 0.00307775  |
| 210567_s_s | S-phase kinase-associated protein 2 (p45      | SKP2        | 0.0261429   |
| 209440_at  | phosphoribosyl pyrophosphate synthetase       | PRPS1       | 0.0157677   |
| 234875_at  | similar to rCG45476                           | LOC729926   | 0.0223369   |
| 239468_at  | mohawk homeobox                               | MKX         | 0.00767122  |
| 217208_s_s | discs, large homolog 1 (Drosophila)           | DLG1        | 0.00954221  |
| 236657_at  | hypothetical protein LOC100130506             | LOC100130   | 0.00286123  |
| 232287_at  | piggyBac transposable element derived 3       | PGBD3       | 0.00154139  |
| 211998_at  | H3 histone, family 3A /// H3 histone, family  | H3F3A /// H | 0.000221293 |
| 206713_at  | netrin G1                                     | NTNG1       | 0.000915343 |
| 212215_at  | prolyl endopeptidase-like                     | PREPL       | 0.000693047 |
| 210255_at  | RAD51-like 1 (S. cerevisiae)                  | RAD51L1     | 0.0158752   |
| 212543_at  | absent in melanoma 1                          | AIM1        | 0.0348827   |
| 204518_s_s | peptidylprolyl isomerase C (cyclophilin C)    | PPIC        | 0.000724262 |
| 202178_at  | protein kinase C, zeta                        | PRKCZ       | 0.00595273  |
| 222062_at  | interleukin 27 receptor, alpha                | IL27RA      | 0.00942767  |
| 228722_at  | protein arginine methyltransferase 2          | PRMT2       | 0.0032695   |
| 204365_s_s | receptor accessory protein 1                  | REEP1       | 0.0010883   |
| 214595_at  | potassium voltage-gated channel, subfam       | KCNG1       | 0.0001878   |
| 244187_at  | Transcribed locus                             | ---         | 0.038349    |
| 205880_at  | protein kinase D1                             | PRKD1       | 0.00605251  |
| 228370_at  | Small nuclear ribonucleoprotein polypepti     | SNRPN       | 4.91E-05    |
| 1569191_a  | zinc finger protein 826                       | ZNF826      | 0.00246711  |
| 209841_s_s | leucine rich repeat neuronal 3                | LRRN3       | 0.00754353  |

|           |                                                           |           |             |
|-----------|-----------------------------------------------------------|-----------|-------------|
| 1553962_s | ras homolog gene family, member B                         | RHOB      | 0.017432    |
| 227996_at | FERM, RhoGEF (ARHGEF) and pleckstrin                      | FARP1     | 0.0010239   |
| 217373_x  | Mdm2 p53 binding protein homolog (mouse)                  | MDM2      | 0.0403874   |
| 200844_s  | peroxiredoxin 6                                           | PRDX6     | 0.000216855 |
| 244066_at | Transcribed locus                                         | ---       | 6.75E-05    |
| 205826_at | myomesin (M-protein) 2, 165kDa                            | MYOM2     | 9.30E-05    |
| 202959_at | methylmalonyl Coenzyme A mutase                           | MUT       | 9.44E-05    |
| 227410_at | family with sequence similarity 43, member 1              | FAM43A    | 0.00851296  |
| 227556_at | non-metastatic cells 7, protein expressed in              | NME7      | 0.0316949   |
| 226587_at | CDNA FLJ33569 fis, clone BRAMY20103'                      | ---       | 0.00150072  |
| 227699_at | chromosome 14 open reading frame 149                      | C14orf149 | 0.00157685  |
| 227623_at | CDNA FLJ30478 fis, clone BRAWH10001'                      | ---       | 0.00275759  |
| 228881_at | presenilin associated, rhomboid-like                      | PARL      | 0.0350367   |
| 217077_s  | gamma-aminobutyric acid (GABA) B receptor                 | GABBR2    | 0.000421733 |
| 224973_at | family with sequence similarity 46, member 1              | FAM46A    | 0.00140012  |
| 202887_s  | DNA-damage-inducible transcript 4                         | DDIT4     | 0.00331628  |
| 241359_at | CDNA FLJ20031 fis, clone ADSU02180                        | ---       | 0.0287714   |
| 203639_s  | fibroblast growth factor receptor 2 (bacterial)           | FGFR2     | 0.00222826  |
| 223136_at | androgen-induced 1                                        | AIG1      | 0.000190871 |
| 226907_at | protein phosphatase 1, regulatory (inhibitory)            | PPP1R14C  | 0.0196496   |
| 204984_at | glypican 4                                                | GPC4      | 0.00786091  |
| 202923_s  | glutamate-cysteine ligase, catalytic subunit              | GCLC      | 0.00137735  |
| 218589_at | purinergic receptor P2Y, G-protein coupled                | P2RY5     | 0.0026272   |
| 226731_at | Pelota homolog (Drosophila)                               | PELO      | 0.00635851  |
| 204920_at | carbamoyl-phosphate synthetase 1, mitochondrial           | CPS1      | 0.00731356  |
| 204136_at | collagen, type VII, alpha 1 (epidermolysis bullosa)       | COL7A1    | 0.000318558 |
| 224495_at | transmembrane protein 107                                 | TMEM107   | 0.00524828  |
| 1554737_a | fibrillin 2 (congenital contractural arachnoid)           | FBN2      | 0.000984776 |
| 235561_at | Transcribed locus                                         | ---       | 0.00156954  |
| 227370_at | KIAA1946                                                  | KIAA1946  | 2.36E-05    |
| 1568603_a | Ca <sup>2+</sup> -dependent secretion activator           | CADPS     | 0.00016651  |
| 203242_s  | PDZ and LIM domain 5                                      | PDLIM5    | 0.00323841  |
| 244631_at | hypothetical gene supported by AK123403                   | LOC389834 | 0.00119019  |
| 221330_at | cholinergic receptor, muscarinic 2                        | CHRM2     | 0.0250183   |
| 232315_at | zinc finger-like                                          | LOC400713 | 0.00557766  |
| 203394_s  | hairy and enhancer of split 1, (Drosophila)               | HES1      | 0.00121744  |
| 231784_s  | WD repeats and SOF1 domain containing                     | WDSOF1    | 0.0393314   |
| 226223_at | Transcribed locus                                         | ---       | 0.000466468 |
| 229190_at | CDNA FLJ90295 fis, clone NT2RP200024                      | ---       | 0.00330441  |
| 231470_at | Transcribed locus                                         | ---       | 0.000356132 |
| 242321_at | Full length insert cDNA clone ZE03F06                     | ---       | 0.0336066   |
| 227559_at | Transcribed locus                                         | ---       | 7.54E-06    |
| 204983_s  | glypican 4                                                | GPC4      | 0.00769718  |
| 218258_at | polymerase (RNA) I polypeptide D, 16kDa                   | POLR1D    | 0.000818899 |
| 203642_s  | COBL-like 1                                               | COBL1     | 0.0039832   |
| 210078_s  | potassium voltage-gated channel, shaker-related           | KCNAB1    | 0.00485898  |
| 205164_at | glycine C-acetyltransferase (2-amino-3-ketoglutarate)     | GCAT      | 0.000283944 |
| 1554575_a | 3'(2'), 5'-bisphosphate nucleotidase 1                    | BPNT1     | 0.00692689  |
| 227764_at | LY6/PLAUR domain containing 6                             | LYPD6     | 0.00378357  |
| 216804_s  | PDZ and LIM domain 5                                      | PDLIM5    | 0.00194217  |
| 221923_s  | nucleophosmin (nucleolar phosphoprotein)                  | NPM1      | 0.000730868 |
| 216840_s  | laminin, alpha 2 (merosin, congenital muscular dystrophy) | LAMA2     | 4.69E-05    |
| 212654_at | tropomyosin 2 (beta)                                      | TPM2      | 0.015327    |

|            |                                                |           |             |
|------------|------------------------------------------------|-----------|-------------|
| 1560402_a  | growth arrest-specific 5                       | GAS5      | 0.0023256   |
| 236647_at  | Transcribed locus                              | ---       | 0.00210841  |
| 203626_s_; | S-phase kinase-associated protein 2 (p45       | SKP2      | 0.0175315   |
| 205116_at  | laminin, alpha 2 (merosin, congenital mus      | LAMA2     | 5.87E-05    |
| 206215_at  | opioid binding protein/cell adhesion molec     | OPCML     | 0.00136125  |
| 229555_at  | UDP-N-acetyl-alpha-D-galactosamine:pol         | GALNT5    | 0.000656893 |
| 238026_at  | ribosomal protein L35a                         | RPL35A    | 2.17E-05    |
| 202342_s_; | tripartite motif-containing 2                  | TRIM2     | 0.000250531 |
| 235085_at  | homolog of rat pragma of Rnd2                  | PRAGMIN   | 0.00427198  |
| 204992_s_; | profilin 2                                     | PFN2      | 4.26E-05    |
| 1556657_a  | CDNA FLJ36459 fis, clone THYMU20147f           | ---       | 0.0201907   |
| 1552487_a  | basonuclin 1                                   | BNC1      | 0.000446923 |
| 231881_at  | caldesmon 1                                    | CALD1     | 0.00136225  |
| 201163_s_; | insulin-like growth factor binding protein 7   | IGFBP7    | 0.00419759  |
| 224936_at  | eukaryotic translation initiation factor 2, su | EIF2S3    | 0.00536002  |
| 209081_s_; | collagen, type XVIII, alpha 1                  | COL18A1   | 0.00122461  |
| 218844_at  | acyl-CoA synthetase family member 2            | ACSF2     | 0.0126943   |
| 216342_x_; | ribosomal protein S4, X-linked /// similar to  | LOC10012f | 4.94E-05    |
| 215531_s_; | gamma-aminobutyric acid (GABA) A rece          | GABRA5    | 0.0204113   |
| 237624_at  | Transcribed locus                              | ---       | 0.00456314  |
| 213684_s_; | PDZ and LIM domain 5                           | PDLIM5    | 0.00381645  |
| 216247_at  | ribosomal protein S20                          | RPS20     | 0.00305072  |
| 203243_s_; | PDZ and LIM domain 5                           | PDLIM5    | 0.00537608  |
| 222844_s_; | serine racemase                                | SRR       | 0.00193303  |
| 202289_s_; | transforming, acidic coiled-coil containing    | TACC2     | 0.00269636  |
| 1556346_a  | Partial mRNA; ID YG39-1A                       | ---       | 0.0248865   |
| 215775_at  | Thrombospondin 1                               | THBS1     | 0.0232776   |
| 215177_s_; | integrin, alpha 6                              | ITGA6     | 0.0148982   |
| 239028_at  | LY6/PLAUR domain containing 6                  | LYPD6     | 0.00494641  |
| 244650_at  | CDNA FLJ43660 fis, clone SYNOV40048f           | ---       | 0.00218408  |
| 235256_s_; | galactose mutarotase (aldose 1-epimeras        | GALM      | 0.000226794 |
| 210993_s_; | SMAD family member 1                           | SMAD1     | 0.00166009  |
| 203763_at  | dynein, cytoplasmic 2, light intermediate c    | DYNC2LI1  | 0.000419281 |
| 219295_s_; | procollagen C-endopeptidase enhancer 2         | PCOLCE2   | 0.0250952   |
| 242414_at  | quinolinate phosphoribosyltransferase (nic     | QPRT      | 0.036379    |
| 236047_at  | chromosome 8 open reading frame 5              | C8orf5    | 0.000233217 |
| 235428_at  | Transcribed locus, strongly similar to NP_1    | ---       | 0.000375253 |
| 1556658_a  | CDNA FLJ36459 fis, clone THYMU20147f           | ---       | 0.0431771   |
| 228124_at  | abhydrolase domain containing 12               | ABHD12    | 0.00012529  |
| 217466_x_; | ribosomal protein S2                           | RPS2      | 0.0023219   |
| 239201_at  | PFTAIRE protein kinase 2                       | PFTK2     | 0.00688632  |
| 228481_at  | CDNA FLJ13419 fis, clone PLACE100211           | ---       | 0.000833385 |
| 207570_at  | short stature homeobox                         | SHOX      | 0.00319762  |
| 227708_at  | eukaryotic translation elongation factor 1 e   | EEF1A1    | 0.000431841 |
| 239069_s_; | Transcribed locus, weakly similar to NP_0      | ---       | 0.000276107 |
| 208763_s_; | TSC22 domain family, member 3                  | TSC22D3   | 0.00260247  |
| 230228_at  | hypothetical LOC284297                         | LOC28429f | 0.00400877  |
| 1567361_a  | brain-derived neurotrophic factor opposite     | BDNFOS    | 0.0101898   |
| 239884_at  | Ca2+-dependent secretion activator             | CADPS     | 0.0108788   |
| 219894_at  | MAGE-like 2                                    | MAGEL2    | 0.000528378 |
| 208482_at  | somatostatin receptor 1                        | SSTR1     | 0.00158605  |
| 206448_at  | zinc finger protein 365                        | ZNF365    | 0.00746362  |
| 215009_s_; | SEC31 homolog A (S. cerevisiae)                | SEC31A    | 0.00296686  |

|             |                                                |            |             |
|-------------|------------------------------------------------|------------|-------------|
| 236223_s_;  | Ras-like without CAAX 1                        | RIT1       | 0.00568633  |
| 233724_at   | aryl hydrocarbon receptor nuclear transloc     | ARNT       | 0.00011545  |
| 202341_s_;  | tripartite motif-containing 2                  | TRIM2      | 0.000717869 |
| 221593_s_;  | ribosomal protein L31                          | RPL31      | 0.00382118  |
| 238790_at   | CLR pseudogene                                 | LOC374444  | 0.0104784   |
| 209840_s_;  | leucine rich repeat neuronal 3                 | LRRN3      | 0.0337277   |
| 1558507_a   | chromosome 1 open reading frame 53             | C1orf53    | 0.0113804   |
| 210602_s_;  | cadherin 6, type 2, K-cadherin (fetal kidne    | CDH6       | 0.000374597 |
| 230144_at   | glutamate receptor, ionotropic, AMPA 3         | GRIA3      | 0.0175592   |
| 201212_at   | legumain                                       | LGMN       | 0.00777154  |
| 243629_x_;  | CDNA clone IMAGE:4819488                       | ---        | 0.00170786  |
| 236453_at   | similar to hCG1993567                          | LOC10013   | 0.00181364  |
| 229712_at   | small nuclear RNA activating complex, pol      | SNAPC3     | 0.00482155  |
| 227270_at   | hypothetical protein LOC285550                 | LOC285550  | 0.0363495   |
| 1553191_a   | dystonin                                       | DST        | 0.00160956  |
| 230903_s_;  | Chromosome 8 open reading frame 42             | C8orf42    | 0.00161105  |
| 1558680_s_; | phosphodiesterase 1A, calmodulin-depend        | PDE1A      | 0.00532731  |
| 238868_at   | uveal autoantigen with coiled-coil domains     | UACA       | 0.00395051  |
| 230894_s_;  | Transcribed locus                              | ---        | 0.00060825  |
| 227963_at   | Transcribed locus                              | ---        | 0.00096522  |
| 225321_s_;  | paired immunoglobulin-like type 2 receptor l   | PILRB      | 0.000802382 |
| 1553973_a   | serine peptidase inhibitor, Kazal type 6       | SPINK6     | 0.0115221   |
| 211700_s_;  | trophinin                                      | TRO        | 0.000832649 |
| 228885_at   | MAM domain containing 2                        | MAMDC2     | 0.0285184   |
| 1558882_a   | similar to HIV TAT specific factor 1; cofact   | LOC40123   | 0.0011601   |
| 236834_at   | sec1 family domain containing 2                | SCFD2      | 0.00814066  |
| 236141_at   | Nbla00301                                      | NBLA0030   | 0.00261967  |
| 211701_s_;  | trophinin                                      | TRO        | 0.000340755 |
| 227421_at   | chromosome 21 open reading frame 57            | C21orf57   | 0.0011354   |
| 239058_at   | Transcribed locus                              | ---        | 0.0226797   |
| 226597_at   | receptor accessory protein 6                   | REEP6      | 0.000186125 |
| 217234_s_;  | ezrin                                          | EZR        | 0.00575661  |
| 214472_at   | histone cluster 1, H3d                         | HIST1H3D   | 0.00671245  |
| 208447_s_;  | phosphoribosyl pyrophosphate synthetase        | PRPS1      | 0.020786    |
| 226637_at   | Ubiquitin-conjugating enzyme E2H (UBC8         | UBE2H      | 0.0235328   |
| 227088_at   | phosphodiesterase 5A, cGMP-specific            | PDE5A      | 0.0141196   |
| 229649_at   | neurexin 3                                     | NRXN3      | 0.0119676   |
| 218816_at   | leucine rich repeat containing 1               | LRRC1      | 0.000481716 |
| 1560477_a   | sterile alpha motif domain containing 11       | SAMD11     | 0.00438872  |
| 243084_at   | caldesmon 1                                    | CALD1      | 0.00253261  |
| 232138_at   | Muscleblind-like 2 (Drosophila)                | MBNL2      | 0.0265504   |
| 235944_at   | hemicentin 1                                   | HMCN1      | 0.00179148  |
| 201397_at   | phosphoglycerate dehydrogenase                 | PHGDH      | 9.10E-05    |
| 233588_x_;  | prefoldin subunit 6                            | PFDN6      | 0.00496367  |
| 212706_at   | RAS p21 protein activator 4 /// hypothetica    | FLJ21767 / | 0.00368121  |
| 228908_s_;  | Chromosome 21 open reading frame 86            | C21orf86   | 0.00305891  |
| 222890_at   | coiled-coil domain containing 113              | CCDC113    | 0.00217833  |
| 227655_at   | CDNA FLJ38512 fis, clone HCHON20005            | ---        | 0.00147767  |
| 210882_s_;  | trophinin                                      | TRO        | 0.00644535  |
| 214182_at   | hypothetical LOC100132430                      | LOC10013   | 0.000509073 |
| 230605_at   | Transcribed locus, strongly similar to XP_(--- | ---        | 0.000959288 |
| 225667_s_;  | family with sequence similarity 84, membe      | FAM84A /// | 0.000916375 |
| 216983_s_;  | zinc finger protein 224                        | ZNF224     | 0.00455574  |

|           |                                             |           |             |
|-----------|---------------------------------------------|-----------|-------------|
| 215945_s_ | tripartite motif-containing 2               | TRIM2     | 0.000499513 |
| 231130_at | Transcribed locus                           | ---       | 6.25E-05    |
| 229218_at | collagen, type I, alpha 2                   | COL1A2    | 0.00100839  |
| 206806_at | diacylglycerol kinase, iota                 | DGKI      | 0.00332868  |
| 238824_at | CDNA FLJ30581 fis, clone BRAWH20070         | ---       | 0.00165779  |
| 242888_at | Transcribed locus, strongly similar to NP_! | ---       | 0.00103458  |
| 212236_x_ | keratin 17                                  | KRT17     | 0.00483058  |
| 222027_at | Nuclear casein kinase and cyclin-depende    | NUCKS1    | 0.0451345   |
| 210654_at | tumor necrosis factor receptor superfamily  | TNFRSF10  | 0.020917    |
| 207264_at | KDEL (Lys-Asp-Glu-Leu) endoplasmic reti     | KDELR3    | 0.000235989 |
| 239708_at | Transcribed locus                           | ---       | 9.03E-05    |
| 216724_at | Doublecortin-like kinase 2                  | DCLK2     | 0.0252306   |
| 236656_s_ | hypothetical protein LOC100130506           | LOC100130 | 0.000477594 |
| 213248_at | hypothetical LOC730101                      | LOC730101 | 0.0220444   |
| 227510_x_ | metastasis associated lung adenocarcinor    | MALAT1    | 0.0106351   |
| 237116_at | hypothetical LOC646903                      | LOC646903 | 0.00156789  |
| 209991_x_ | gamma-aminobutyric acid (GABA) B rece       | GABBR2    | 0.000287455 |
| 214390_s_ | branched chain aminotransferase 1, cytos    | BCAT1     | 3.62E-05    |
| 223606_x_ | KIAA1704                                    | KIAA1704  | 0.00433666  |
| 215199_at | caldesmon 1                                 | CALD1     | 0.0212083   |
| 1559500_a | vacuolar protein sorting 8 homolog (S. cer  | VPS8      | 0.0349615   |
| 204203_at | CCAAT/enhancer binding protein (C/EBP)      | CEBPG     | 0.00208589  |
| 222991_s_ | ubiquilin 1                                 | UBQLN1    | 0.00133085  |
| 235545_at | DEP domain containing 1                     | DEPDC1    | 0.04245     |
| 221436_s_ | cell division cycle associated 3            | CDCA3     | 0.0317984   |
| 1560049_a | CDNA FLJ36973 fis, clone BRACE200624        | ---       | 0.00694902  |
| 202307_s_ | transporter 1, ATP-binding cassette, sub-f  | TAP1      | 0.00237416  |
| 219028_at | homeodomain interacting protein kinase 2    | HIPK2     | 0.0245757   |
| 1565830_a | MRNA; cDNA DKFZp686D0673 (from chlor        | ---       | 0.00352624  |
| 209324_s_ | regulator of G-protein signaling 16         | RGS16     | 0.0264567   |
| 214374_s_ | PTPRF interacting protein, binding protein  | PPFIBP1   | 0.00183054  |
| 204255_s_ | vitamin D (1,25- dihydroxyvitamin D3) rec   | VDR       | 0.000496519 |
| 227910_at | X-prolyl aminopeptidase (aminopeptidase     | XPNPEP3   | 0.000531799 |
| 1554199_a | protein tyrosine phosphatase, receptor typ  | PTPRO     | 0.00774996  |
| 223452_s_ | atlastin 3                                  | ATL3      | 0.000301274 |
| 238756_at | Growth arrest-specific 2 like 3             | GAS2L3    | 0.0243823   |
| 239661_at | Transcribed locus                           | ---       | 0.00212272  |
| 225987_at | STEAP family member 4                       | STEAP4    | 0.000131012 |
| 238429_at | transmembrane protein 71                    | TMEM71    | 0.00394941  |
| 205782_at | fibroblast growth factor 7 (keratinocyte gr | FGF7      | 0.0130771   |
| 227486_at | 5'-nucleotidase, ecto (CD73)                | NT5E      | 0.0032241   |
| 210612_s_ | synaptojanin 2                              | SYNJ2     | 0.00646163  |
| 212914_at | chromobox homolog 7                         | CBX7      | 0.00656661  |
| 1556667_a | hypothetical protein LOC348751              | LOC348751 | 0.00794807  |
| 238183_at | Transcribed locus                           | ---       | 0.00140737  |
| 227383_at | hypothetical protein LOC727820              | LOC727820 | 0.000434651 |
| 206157_at | pentraxin-related gene, rapidly induced by  | PTX3      | 0.00527993  |
| 201120_s_ | progesterone receptor membrane compor       | PGRMC1    | 0.00251107  |
| 244779_at | CDNA FLJ34038 fis, clone FCBBF200564        | ---       | 0.0223655   |
| 211006_s_ | potassium voltage-gated channel, Shab-re    | KCNB1     | 0.00549076  |
| 206449_s_ | mannan-binding lectin serine peptidase 1    | MASP1     | 0.00102548  |
| 223502_s_ | tumor necrosis factor (ligand) superfamily, | TNFSF13B  | 0.0352629   |
| 1557765_a | hypothetical protein LOC643401              | LOC643401 | 0.0277557   |

|           |                                                         |               |             |
|-----------|---------------------------------------------------------|---------------|-------------|
| 1556328_a | CDNA clone IMAGE:5301690                                | ---           | 0.00811923  |
| 239519_at | Transcribed locus                                       | ---           | 0.0041749   |
| 224924_at | tetratricopeptide repeat domain 7A                      | TTC7A         | 0.00898601  |
| 202240_at | polo-like kinase 1 (Drosophila)                         | PLK1          | 0.0123483   |
| 227503_at | CDNA FLJ43100 fis, clone CTONG20031(                    | ---           | 0.000637211 |
| 212486_s_ | FYN oncogene related to SRC, FGR, YES                   | FYN           | 0.00527953  |
| 243743_at | Transcribed locus                                       | ---           | 0.00224638  |
| 224623_at | THO complex 3 /// similar to THO complex                | LOC728554     | 5.51E-05    |
| 210073_at | ST8 alpha-N-acetyl-neuraminide alpha-2,6                | ST8SIA1       | 0.00391018  |
| 213309_at | phospholipase C-like 2                                  | PLCL2         | 0.000479046 |
| 230536_at | pre-B-cell leukemia homeobox 4                          | PBX4          | 0.0011233   |
| 208607_s_ | serum amyloid A1 /// serum amyloid A2                   | SAA1 /// SAA2 | 0.001805    |
| 1559663_a | Clone HQ0312                                            | ---           | 0.000163752 |
| 204817_at | extra spindle pole bodies homolog 1 (S. cerevisiae)     | ESPL1         | 0.00544796  |
| 219360_s_ | transient receptor potential cation channel             | TRPM4         | 0.00258385  |
| 1555759_a | chemokine (C-C motif) ligand 5                          | CCL5          | 0.00886597  |
| 231969_at | storkhead box 2                                         | STOX2         | 0.00374809  |
| 228771_at | adrenergic, beta, receptor kinase 2                     | ADRBK2        | 0.00332196  |
| 213348_at | cyclin-dependent kinase inhibitor 1C (p57, CDKN1C)      | CDKN1C        | 0.0402722   |
| 209807_s_ | nuclear factor I/X (CCAAT-binding transcription factor) | NFIX          | 0.00644624  |
| 225458_at | hypothetical LOC25845                                   | LOC25845      | 0.0188841   |
| 221211_s_ | chromosome 21 open reading frame 7                      | C21orf7       | 0.000683374 |
| 207521_s_ | ATPase, Ca++ transporting, ubiquitous                   | ATP2A3        | 0.00466231  |
| 230744_at | Transcribed locus                                       | ---           | 0.00263098  |
| 241701_at | Rho GTPase activating protein 21                        | ARHGAP21      | 0.0408766   |
| 236184_at | Transcribed locus                                       | ---           | 0.011077    |
| 210821_x_ | centromere protein A                                    | CENPA         | 0.00955683  |
| 213134_x_ | BTG family, member 3                                    | BTG3          | 9.10E-05    |
| 244427_at | Kinesin family member 23                                | KIF23         | 0.00518695  |
| 208702_x_ | amyloid beta (A4) precursor-like protein 2              | APLP2         | 0.00334448  |
| 227243_s_ | early B-cell factor 3                                   | EBF3          | 0.00193281  |
| 234033_at | Clone IMAGE:110218 mRNA sequence                        | ---           | 0.000174678 |
| 204641_at | NIMA (never in mitosis gene a)-related kinase 2         | NEK2          | 0.0270446   |
| 202531_at | interferon regulatory factor 1                          | IRF1          | 0.0385044   |
| 241399_at | family with sequence similarity 19 (chemokine)          | FAM19A2       | 0.0154216   |
| 201762_s_ | proteasome (prosome, macropain) activator subunit 2     | PSME2         | 0.000587907 |
| 209281_s_ | ATPase, Ca++ transporting, plasma membrane              | ATP2B1        | 0.0245949   |
| 204115_at | guanine nucleotide binding protein (G protein-coupled)  | GNG11         | 0.000936917 |
| 242657_at | Transcribed locus                                       | ---           | 0.000206984 |
| 225895_at | synaptopodin 2                                          | SYNPO2        | 0.00033625  |
| 210026_s_ | caspase recruitment domain family, member 10            | CARD10        | 0.0465648   |
| 1555826_a | effector cell peptidase receptor 1                      | EPR1          | 0.00216507  |
| 1566284_a | PA4=candidate oncogene (3' region) [human]              | ---           | 0.0184409   |
| 235117_at | ChaC, cation transport regulator homolog                | CHAC2         | 0.00527058  |
| 200884_at | creatine kinase, brain                                  | CKB           | 0.0131339   |
| 234973_at | solute carrier family 38, member 5                      | SLC38A5       | 0.000355319 |
| 203698_s_ | frizzled-related protein                                | FRZB          | 0.0148814   |
| 230972_at | ankyrin repeat domain 9                                 | ANKRD9        | 0.0114429   |
| 218782_s_ | ATPase family, AAA domain containing 2                  | ATAD2         | 0.0080714   |
| 243198_at | testis expressed 9                                      | TEX9          | 0.00353931  |
| 225033_at | hypothetical LOC286167                                  | LOC286167     | 0.00481295  |
| 224806_at | tripartite motif-containing 25                          | TRIM25        | 0.000530741 |
| 215245_x_ | fragile X mental retardation 1                          | FMR1          | 0.00042664  |

|            |                                              |            |             |
|------------|----------------------------------------------|------------|-------------|
| 206140_at  | LIM homeobox 2                               | LHX2       | 0.00633551  |
| 214433_s_  | selenium binding protein 1                   | SELENBP1   | 0.0127032   |
| 224701_at  | poly (ADP-ribose) polymerase family, men     | PARP14     | 0.00639609  |
| 209436_at  | spondin 1, extracellular matrix protein      | SPON1      | 0.00186765  |
| 203939_at  | 5'-nucleotidase, ecto (CD73)                 | NT5E       | 0.000357811 |
| 205253_at  | pre-B-cell leukemia homeobox 1               | PBX1       | 0.00206388  |
| 239808_at  | Transcribed locus                            | ---        | 0.0129045   |
| 211080_s_  | NIMA (never in mitosis gene a)-related kin   | NEK2       | 0.0397446   |
| 241210_at  | Transcribed locus                            | ---        | 0.000831782 |
| 208178_x_  | triple functional domain (PTPRF interactin   | TRIO       | 0.0213907   |
| 222651_s_  | trichorhinophalangeal syndrome I             | TRPS1      | 0.00013798  |
| 201188_s_  | inositol 1,4,5-triphosphate receptor, type 3 | ITPR3      | 0.0324162   |
| 209753_s_  | thymopoietin                                 | TMPO       | 0.0137963   |
| 230026_at  | mitochondrial ribosomal protein L43          | MRPL43     | 0.000496507 |
| 240419_at  | solute carrier family 6, member 15           | SLC6A15    | 0.00606883  |
| 215078_at  | superoxide dismutase 2, mitochondrial        | SOD2       | 0.037908    |
| 215471_s_  | microtubule-associated protein 7             | MAP7       | 0.000666755 |
| 213537_at  | major histocompatibility complex, class II,  | HLA-DPA1   | 0.000780635 |
| 48808_at   | dihydrofolate reductase                      | DHFR       | 0.0392313   |
| 230434_at  | phosphatase, orphan 2                        | PHOSPHO    | 0.00263303  |
| 222450_at  | prostate transmembrane protein, androge      | PMEPA1     | 0.0164803   |
| 221903_s_  | cyllindromatosis (turban tumor syndrome)     | CYLD       | 2.72E-05    |
| 207345_at  | follistatin                                  | FST        | 0.00231912  |
| 211813_x_  | decorin                                      | DCN        | 0.00267348  |
| 235368_at  | ADAM metallopeptidase with thrombospor       | ADAMTS5    | 0.0239587   |
| 244506_at  | transmembrane and tetratricopeptide repe     | TMTC1      | 0.00195276  |
| 1568999_a  | pregnancy specific beta-1-glycoprotein 4     | PSG4       | 0.006146    |
| 213069_at  | HEG homolog 1 (zebrafish)                    | HEG1       | 2.51E-05    |
| 209676_at  | tissue factor pathway inhibitor (lipoprotein | TFPI       | 0.00303351  |
| 220155_s_  | bromodomain containing 9                     | BRD9       | 0.000139877 |
| 204655_at  | chemokine (C-C motif) ligand 5               | CCL5       | 0.010017    |
| 225263_at  | heparan sulfate 6-O-sulfotransferase 1       | HS6ST1     | 0.0263961   |
| 223125_s_  | chromosome 1 open reading frame 21           | C1orf21    | 0.00769811  |
| 209258_s_  | structural maintenance of chromosomes 3      | SMC3       | 0.00108916  |
| 203636_at  | midline 1 (Opitz/BBB syndrome)               | MID1       | 0.00353679  |
| 205961_s_  | PC4 and SFRS1 interacting protein 1          | PSIP1      | 0.0120482   |
| 1554334_a  | DnaJ (Hsp40) homolog, subfamily A, merr      | DNAJA4     | 0.000445768 |
| 205960_at  | pyruvate dehydrogenase kinase, isozyme       | PDK4       | 0.00152565  |
| 1559141_s_ | family with sequence similarity 87, membe    | FAM87A /// | 0.00311701  |
| 209040_s_  | proteasome (prosome, macropain) subuni       | PSMB8      | 0.00344857  |
| 239002_at  | asp (abnormal spindle) homolog, microce      | ASPM       | 0.0171798   |
| 228439_at  | basic leucine zipper transcription factor, A | BATF2      | 0.0186186   |
| 1554544_a  | myelin basic protein                         | MBP        | 0.0263774   |
| 1565579_a  | CDNA clone IMAGE:3689276                     | ---        | 0.00052742  |
| 212582_at  | oxysterol binding protein-like 8             | OSBPL8     | 0.000238024 |
| 224944_at  | thymopoietin                                 | TMPO       | 0.00752739  |
| 205383_s_  | zinc finger and BTB domain containing 20     | ZBTB20     | 0.000705915 |
| 214822_at  | family with sequence similarity 5, member    | FAM5B      | 0.0132876   |
| 1554473_a  | SLIT-ROBO Rho GTPase activating prote        | SRGAP1     | 0.00223873  |
| 242671_at  | ---                                          | ---        | 0.00149203  |
| 208928_at  | P450 (cytochrome) oxidoreductase             | POR        | 0.000453783 |
| 213285_at  | transmembrane protein 30B                    | TMEM30B    | 0.000653159 |
| 242677_at  | Neuropilin 1                                 | NRP1       | 0.0278456   |



|            |                                               |           |             |
|------------|-----------------------------------------------|-----------|-------------|
| 205174_s_  | glutaminy-peptide cyclotransferase (gluta     | QPCT      | 0.000535343 |
| 208191_x_  | pregnancy specific beta-1-glycoprotein 4      | PSG4      | 0.0016988   |
| 213156_at  | Homo sapiens, clone IMAGE:4214654, ml---      |           | 0.00103638  |
| 244075_at  | Transcribed locus                             | ---       | 0.0125896   |
| 201690_s_  | tumor protein D52                             | TPD52     | 0.0359947   |
| 239108_at  | Male sterility domain containing 1            | MLSTD1    | 0.0121029   |
| 238767_at  | Transcribed locus                             | ---       | 0.0013542   |
| 225062_at  | hypothetical gene supported by AL713796       | LOC100133 | 0.00548779  |
| 232346_at  | CDNA FLJ13580 fis, clone PLACE100885---       |           | 0.00130698  |
| 218856_at  | tumor necrosis factor receptor superfamily    | TNFRSF21  | 0.00727603  |
| 229912_at  | sidekick homolog 1, cell adhesion molecu      | SDK1      | 0.000233232 |
| 220326_s_  | hypothetical protein FLJ10357                 | FLJ10357  | 0.00237207  |
| 235643_at  | sterile alpha motif domain containing 9-lik   | SAMD9L    | 0.0159327   |
| 221081_s_  | DENN/MADD domain containing 2D                | DENND2D   | 0.000243708 |
| 238619_at  | CDNA FLJ26188 fis, clone ADG04821             | ---       | 0.000109128 |
| 227367_at  | Transcribed locus                             | ---       | 0.00482609  |
| 213008_at  | Fanconi anemia, complementation group         | FANCI     | 0.0246859   |
| 1556053_a  | DnaJ (Hsp40) homolog, subfamily C, men        | DNAJC7    | 0.00563423  |
| 203882_at  | interferon regulatory factor 9                | IRF9      | 0.0010377   |
| 225056_at  | signal-induced proliferation-associated 1 li  | SIPA1L2   | 0.00638832  |
| 214012_at  | endoplasmic reticulum aminopeptidase 1        | ERAP1     | 0.00415463  |
| 224339_s_  | angiopoietin-like 1                           | ANGPTL1   | 0.00055538  |
| 204731_at  | transforming growth factor, beta receptor     | TGFB3     | 0.000984653 |
| 227230_s_  | KIAA1211 protein                              | KIAA1211  | 0.00927698  |
| 217889_s_  | cytochrome b reductase 1                      | CYBRD1    | 0.000779523 |
| 1555167_s_ | nicotinamide phosphoribosyltransferase        | NAMPT     | 0.0138576   |
| 209257_s_  | structural maintenance of chromosomes 3       | SMC3      | 0.000111823 |
| 218627_at  | damage-regulated autophagy modulator          | DRAM      | 0.00234151  |
| 205560_at  | proprotein convertase subtilisin/kexin type   | PCSK5     | 0.021114    |
| 207978_s_  | nuclear receptor subfamily 4, group A, me     | NR4A3     | 5.01E-06    |
| 203213_at  | cell division cycle 2, G1 to S and G2 to M    | CDC2      | 0.0490276   |
| 225941_at  | eukaryotic translation initiation factor 4E f | EIF4E3    | 0.0185073   |
| 238297_at  | ---                                           | ---       | 0.000654522 |
| 216033_s_  | FYN oncogene related to SRC, FGR, YES         | FYN       | 0.00556831  |
| 216952_s_  | lamin B2                                      | LMNB2     | 0.00389515  |
| 205548_s_  | BTG family, member 3                          | BTG3      | 9.57E-05    |
| 206187_at  | prostaglandin I2 (prostacyclin) receptor (IF  | PTGIR     | 0.00149576  |
| 230163_at  | Hypothetical protein LOC143381                | LOC143381 | 0.0389595   |
| 230963_at  | empty spiracles homeobox 2 opposite str       | EMX2OS    | 0.00756209  |
| 203963_at  | carbonic anhydrase XII                        | CA12      | 0.0034245   |
| 220340_at  | KIAA1772                                      | KIAA1772  | 0.000476926 |
| 223340_at  | spastic paraplegia 3A (autosomal dominar      | SPG3A     | 0.0177732   |
| 1568680_s_ | YTH domain containing 2                       | YTHDC2    | 0.0126049   |
| 223220_s_  | poly (ADP-ribose) polymerase family, men      | PARP9     | 0.0228993   |
| 221872_at  | retinoic acid receptor responder (tazaroter   | RARRES1   | 0.00179306  |
| 205602_x_  | pregnancy specific beta-1-glycoprotein 7      | PSG7      | 0.000458197 |
| 229350_x_  | poly (ADP-ribose) polymerase family, men      | PARP10    | 0.00180346  |
| 1560318_a  | Rho GTPase activating protein 29              | ARHGAP29  | 0.0106493   |
| 231403_at  | Triple functional domain (PTPRF interactir    | TRIO      | 0.0113654   |
| 216237_s_  | minichromosome maintenance complex c          | MCM5      | 0.00757297  |
| 241457_at  | Transcribed locus                             | ---       | 0.0184144   |
| 1554825_a  | ---                                           | ---       | 0.000452395 |
| 219441_s_  | leucine-rich repeat kinase 1                  | LRRK1     | 0.000399362 |

|            |                                             |          |             |
|------------|---------------------------------------------|----------|-------------|
| 243805_at  | collagen and calcium binding EGF domain     | CCBE1    | 0.000403749 |
| 203637_s_  | midline 1 (Opitz/BBB syndrome)              | MID1     | 0.00345671  |
| 209053_s_  | Wolf-Hirschhorn syndrome candidate 1        | WHSC1    | 0.0127483   |
| 214086_s_  | poly (ADP-ribose) polymerase family, men    | PARP2    | 0.000700864 |
| 211744_s_  | CD58 molecule                               | CD58     | 0.015311    |
| 209408_at  | kinesin family member 2C                    | KIF2C    | 0.00898389  |
| 1552538_a  | kinesin family member 6                     | KIF6     | 0.00301494  |
| 204168_at  | microsomal glutathione S-transferase 2      | MGST2    | 0.00591914  |
| 222802_at  | endothelin 1                                | EDN1     | 0.00976339  |
| 229357_at  | ADAM metallopeptidase with thrombospor      | ADAMTS5  | 0.0357176   |
| 225564_at  | spermatogenesis associated 13               | SPATA13  | 0.00207152  |
| 232530_at  | phospholipase D1, phosphatidylcholine-s     | PLD1     | 0.00677896  |
| 227461_at  | stonin 2                                    | STON2    | 0.00557381  |
| 228469_at  | Peptidylprolyl isomerase D (cyclophilin D)  | PPID     | 0.00155343  |
| 207785_s_  | recombination signal binding protein for ir | RBPJ     | 0.00058792  |
| 228340_at  | transducin-like enhancer of split 3 (E(sp1) | TLE3     | 0.0019207   |
| 214285_at  | fatty acid binding protein 3, muscle and he | FABP3    | 0.0474258   |
| 201984_s_  | epidermal growth factor receptor (erythro   | EGFR     | 0.00081917  |
| 210052_s_  | TPX2, microtubule-associated, homolog (     | TPX2     | 0.0474811   |
| 211792_s_  | cyclin-dependent kinase inhibitor 2C (p18,  | CDKN2C   | 0.00600526  |
| 219197_s_  | signal peptide, CUB domain, EGF-like 2      | SCUBE2   | 0.00106948  |
| 227769_at  | Transcribed locus                           | ---      | 0.047604    |
| 1556283_s_ | FGFR1 oncogene partner 2                    | FGFR1OP2 | 0.000547132 |
| 203910_at  | Rho GTPase activating protein 29            | ARHGAP29 | 0.0022702   |
| 218541_s_  | chromosome 8 open reading frame 4           | C8orf4   | 0.00565336  |
| 1558924_s_ | CAP-GLY domain containing linker protei     | CLIP1    | 0.000842785 |
| 220466_at  | coiled-coil domain containing 15            | CCDC15   | 0.00540087  |
| 208535_x_  | collagen, type XIII, alpha 1                | COL13A1  | 0.00023635  |
| 229228_at  | cAMP responsive element binding protein     | CREB5    | 0.00309407  |
| 1556754_a  | CDNA FLJ33712 fis, clone BRAWH20082         | ---      | 0.000324928 |
| 216361_s_  | MYST histone acetyltransferase (monocyt     | MYST3    | 0.0236688   |
| 226129_at  | family with sequence similarity 83, membe   | FAM83H   | 0.00490381  |
| 235308_at  | zinc finger and BTB domain containing 20    | ZBTB20   | 0.00318242  |
| 214727_at  | breast cancer 2, early onset                | BRCA2    | 0.00312773  |
| 228692_at  | CDNA FLJ13569 fis, clone PLACE100836        | ---      | 0.0369332   |
| 225896_at  | CDNA FLJ34018 fis, clone FCBBF200280        | ---      | 0.00639199  |
| 220615_s_  | male sterility domain containing 1          | MLSTD1   | 0.00669967  |
| 214077_x_  | Meis homeobox 3 pseudogene 1                | MEIS3P1  | 0.00478961  |
| 210832_x_  | prostaglandin E receptor 3 (subtype EP3)    | PTGER3   | 0.0218093   |
| 243404_at  | Transcribed locus                           | ---      | 0.000659837 |
| 229001_at  | protein phosphatase 1, regulatory (inhibit  | PPP1R3E  | 0.00217001  |
| 221521_s_  | GIN5 complex subunit 2 (Psf2 homolog)       | GIN52    | 0.0268209   |
| 223657_at  | chromosome 1 open reading frame 90          | C1orf90  | 0.00241299  |
| 205327_s_  | activin A receptor, type IIA                | ACVR2A   | 0.00798863  |
| 236962_at  | Transcribed locus                           | ---      | 0.0220475   |
| 222001_x_  | family with sequence similarity 91, membe   | FAM91A2  | 0.000370128 |
| 204444_at  | kinesin family member 11                    | KIF11    | 0.0447389   |
| 210105_s_  | FYN oncogene related to SRC, FGR, YES       | FYN      | 0.000464347 |
| 227948_at  | FYVE, RhoGEF and PH domain containin        | FGD4     | 0.00625616  |
| 223076_s_  | NOL1/NOP2/Sun domain family, member         | NSUN2    | 0.000122943 |
| 227717_at  | FLJ41603 protein                            | FLJ41603 | 0.00629284  |
| 213103_at  | StAR-related lipid transfer (START) domai   | STARD13  | 0.000276323 |
| 1558199_a  | fibronectin 1                               | FN1      | 0.0240023   |

|            |                                              |             |             |
|------------|----------------------------------------------|-------------|-------------|
| 209149_s_  | ;transmembrane 9 superfamily member 1        | TM9SF1      | 0.000289357 |
| 205205_at  | v-rel reticuloendotheliosis viral oncogene   | RELB        | 0.0204081   |
| 235836_at  | matrix-remodelling associated 7              | MXRA7       | 0.00287732  |
| 222680_s_  | ;denticleless homolog (Drosophila)           | DTL         | 0.0378051   |
| 222847_s_  | ;egl nine homolog 3 (C. elegans)             | EGLN3       | 0.0449545   |
| 243050_at  | Transcribed locus                            | ---         | 0.00022237  |
| 203052_at  | complement component 2                       | C2          | 0.00456488  |
| 209355_s_  | ;phosphatidic acid phosphatase type 2B       | PPAP2B      | 0.00316815  |
| 1555009_a  | synaptojanin 2                               | SYNJ2       | 0.00671642  |
| 243495_s_  | ;MRNA; cDNA DKFZp686E18224 (from clc         | ---         | 0.0100761   |
| 221696_s_  | ;serine/threonine/tyrosine kinase 1          | STYK1       | 0.000637874 |
| 204442_x_  | ;latent transforming growth factor beta binc | LTBP4       | 0.0344271   |
| 210665_at  | tissue factor pathway inhibitor (lipoprotein | TFPI        | 0.00864921  |
| 232653_at  | CDNA FLJ14044 fis, clone HEMBA10061;         | ---         | 0.00584141  |
| 211432_s_  | ;TYRO3 protein tyrosine kinase               | TYRO3       | 0.000345807 |
| 236561_at  | Transforming growth factor, beta receptor    | TGFB1       | 0.00933279  |
| 210367_s_  | ;prostaglandin E synthase                    | PTGES       | 0.00122889  |
| 201502_s_  | ;nuclear factor of kappa light polypeptide g | NFKBIA      | 0.00853645  |
| 222740_at  | ATPase family, AAA domain containing 2       | ATAD2       | 0.0240478   |
| 215485_s_  | ;intercellular adhesion molecule 1 (CD54),   | ICAM1       | 0.00319124  |
| 209891_at  | SPC25, NDC80 kinetochore complex com         | SPC25       | 0.0226146   |
| 204170_s_  | ;CDC28 protein kinase regulatory subunit 2   | CKS2        | 0.0125299   |
| 205663_at  | poly(rC) binding protein 3                   | PCBP3       | 0.000335666 |
| 228493_at  | NFKB activating protein                      | NKAP        | 0.00172814  |
| 202637_s_  | ;intercellular adhesion molecule 1 (CD54),   | ICAM1       | 0.00911978  |
| 201957_at  | protein phosphatase 1, regulatory (inhibitc  | PPP1R12B    | 0.013232    |
| 210285_x_  | ;Wilms tumor 1 associated protein            | WTAP        | 0.0492635   |
| 202338_at  | thymidine kinase 1, soluble                  | TK1         | 0.0165735   |
| 203967_at  | cell division cycle 6 homolog (S. cerevisia  | CDC6        | 0.0458925   |
| 222848_at  | centromere protein K                         | CENPK       | 0.0286041   |
| 225152_at  | zinc finger protein 622                      | ZNF622      | 0.000717508 |
| 231786_at  | homeobox A13                                 | HOXA13      | 0.002978    |
| 228919_at  | ---                                          | ---         | 0.00917453  |
| 238736_at  | REV3-like, catalytic subunit of DNA polym    | REV3L       | 0.00576459  |
| 205330_at  | meningioma (disrupted in balanced transk     | MN1         | 0.00015087  |
| 1554741_s_ | fibroblast growth factor 7 (keratinocyte grc | FGF7 /// KC | 0.0110418   |
| 1555355_a  | v-ets erythroblastosis virus E26 oncogene    | ETS1        | 0.00266208  |
| 234992_x_  | ;epithelial cell transforming sequence 2 on  | ECT2        | 0.000267813 |
| 242418_at  | Chromosome 2 open reading frame 27           | C2orf27     | 0.00725504  |
| 217914_at  | two pore segment channel 1                   | TPCN1       | 0.0109694   |
| 227915_at  | ankyrin repeat and SOCS box-containing       | ASB2        | 0.00181851  |
| 222958_s_  | ;DEP domain containing 1                     | DEPDC1      | 0.021006    |
| 218741_at  | centromere protein M                         | CENPM       | 0.0282392   |
| 228494_at  | protein phosphatase 1, regulatory (inhibitc  | PPP1R9A     | 0.0191307   |
| 203528_at  | sema domain, immunoglobulin domain (Ig       | SEMA4D      | 0.00536963  |
| 218574_s_  | ;LIM and cysteine-rich domains 1             | LMCD1       | 0.00669257  |
| 225721_at  | synaptopodin 2                               | SYNPO2      | 0.000286263 |
| 219918_s_  | ;asp (abnormal spindle) homolog, microce     | ASPM        | 0.0385763   |
| 229304_s_  | ;MLF1 interacting protein                    | MLF1IP      | 0.0100431   |
| 229247_at  | fibulin 7                                    | FBLN7       | 0.00311415  |
| 210831_s_  | ;prostaglandin E receptor 3 (subtype EP3)    | PTGER3      | 0.0305503   |
| 220295_x_  | ;DEP domain containing 1                     | DEPDC1      | 0.028664    |
| 212021_s_  | ;antigen identified by monoclonal antibody   | MKI67       | 0.00715138  |

|           |                                               |           |             |
|-----------|-----------------------------------------------|-----------|-------------|
| 203927_at | nuclear factor of kappa light polypeptide g   | NFKBIE    | 0.00570549  |
| 214269_at | major facilitator superfamily domain conta    | MFSD7     | 0.000427833 |
| 206324_s_ | death-associated protein kinase 2             | DAPK2     | 0.00185704  |
| 226718_at | adhesion molecule with Ig-like domain 1       | AMIGO1    | 0.00663372  |
| 231513_at | Transcribed locus                             | ---       | 0.000427466 |
| 209940_at | poly (ADP-ribose) polymerase family, men      | PARP3     | 0.00690249  |
| 226185_at | CDNA: FLJ23044 fis, clone LNG02454            | ---       | 0.000741352 |
| 200632_s_ | N-myc downstream regulated gene 1             | NDRG1     | 0.00446294  |
| 206472_s_ | transducin-like enhancer of split 3 (E(sp1)   | TLE3      | 0.0136456   |
| 228365_at | copine VIII                                   | CPNE8     | 0.00390905  |
| 218739_at | abhydrolase domain containing 5               | ABHD5     | 0.000969317 |
| 202896_s_ | signal-regulatory protein alpha               | SIRPA     | 0.00260366  |
| 203716_s_ | dipeptidyl-peptidase 4 (CD26, adenosine c     | DPP4      | 0.00024628  |
| 230800_at | adenylate cyclase 4                           | ADCY4     | 0.000358644 |
| 228593_at | hypothetical LOC339483                        | LOC339483 | 0.00152384  |
| 209054_s_ | Wolf-Hirschhorn syndrome candidate 1          | WHSC1     | 0.00720933  |
| 222449_at | prostate transmembrane protein, androge       | PMEPA1    | 0.0110207   |
| 242890_at | CDNA FLJ34225 fis, clone FCBBF302337          | ---       | 0.0355081   |
| 216269_s_ | elastin (supravalvular aortic stenosis, Willi | ELN       | 0.0337884   |
| 225373_at | chromosome 10 open reading frame 54           | C10orf54  | 0.00931731  |
| 201189_s_ | inositol 1,4,5-triphosphate receptor, type 3  | ITPR3     | 0.000992158 |
| 238032_at | Transcribed locus                             | ---       | 0.00421664  |
| 213258_at | tissue factor pathway inhibitor (lipoprotein  | TFPI      | 0.00308828  |
| 208436_s_ | interferon regulatory factor 7                | IRF7      | 0.00397684  |
| 203418_at | cyclin A2                                     | CCNA2     | 0.00861051  |
| 227550_at | hypothetical protein LOC143381                | LOC143381 | 0.0346862   |
| 208696_at | chaperonin containing TCP1, subunit 5 (e)     | CCT5      | 1.43E-05    |
| 218691_s_ | PDZ and LIM domain 4                          | PDLIM4    | 0.000590542 |
| 209660_at | transthyretin (prealbumin, amyloidosis typ    | TTR       | 0.000362599 |
| 216005_at | Tenascin C (hexabrachion)                     | TNC       | 0.000601879 |
| 201508_at | insulin-like growth factor binding protein 4  | IGFBP4    | 0.0123115   |
| 206908_s_ | claudin 11 (oligodendrocyte transmembran      | CLDN11    | 0.0307397   |
| 213994_s_ | spondin 1, extracellular matrix protein       | SPON1     | 0.0042351   |
| 237426_at | SP100 nuclear antigen                         | SP100     | 0.000720286 |
| 239448_at | Transcribed locus                             | ---       | 0.000373071 |
| 219858_s_ | FLJ20160 protein                              | FLJ20160  | 0.000967433 |
| 226869_at | multiple EGF-like-domains 6                   | MEGF6     | 0.0167423   |
| 230165_at | shugoshin-like 2 (S. pombe)                   | SGOL2     | 0.016266    |
| 220783_at | matrix metalloproteinase 27                   | MMP27     | 0.0044869   |
| 203214_x_ | cell division cycle 2, G1 to S and G2 to M    | CDC2      | 0.0412158   |
| 239979_at | ---                                           | ---       | 0.0217112   |
| 223556_at | helicase, lymphoid-specific                   | HELLS     | 0.00747912  |
| 204680_s_ | Rap guanine nucleotide exchange factor (      | RAPGEF5   | 0.0396291   |
| 224184_s_ | Boc homolog (mouse)                           | BOC       | 0.000599366 |
| 217436_x_ | major histocompatibility complex, class I, .  | HLA-J     | 0.00056912  |
| 205193_at | v-maf musculoaponeurotic fibrosarcoma o       | MAFF      | 0.000923528 |
| 210374_x_ | prostaglandin E receptor 3 (subtype EP3)      | PTGER3    | 0.0310417   |
| 200814_at | proteasome (prosome, macropain) activat       | PSME1     | 0.000565822 |
| 205891_at | adenosine A2b receptor                        | ADORA2B   | 0.00152529  |
| 206796_at | WNT1 inducible signaling pathway protein      | WISP1     | 0.000224668 |
| 209654_at | KIAA0947 protein                              | KIAA0947  | 0.000383936 |
| 202947_s_ | glycophorin C (Gerbich blood group)           | GYPC      | 0.00205149  |
| 211564_s_ | PDZ and LIM domain 4                          | PDLIM4    | 0.00227312  |

|            |                                              |           |             |
|------------|----------------------------------------------|-----------|-------------|
| 201292_at  | topoisomerase (DNA) II alpha 170kDa          | TOP2A     | 0.0352924   |
| 201736_s_  | membrane-associated ring finger (C3HC4       | 6-Mar     | 0.000129912 |
| 218943_s_  | DEAD (Asp-Glu-Ala-Asp) box polypeptide       | DDX58     | 0.0228156   |
| 221207_s_  | neurobeachin                                 | NBEA      | 0.00330863  |
| 232392_at  | Splicing factor, arginine/serine-rich 3      | SFRS3     | 0.00968276  |
| 215184_at  | death-associated protein kinase 2            | DAPK2     | 0.00897605  |
| 211974_x_  | recombination signal binding protein for ir  | RBPJ      | 0.00113786  |
| 203414_at  | monocyte to macrophage differentiation-a     | MMD       | 0.00932319  |
| 208394_x_  | endothelial cell-specific molecule 1         | ESM1      | 0.00596685  |
| 207334_s_  | transforming growth factor, beta receptor I  | TGFB2     | 0.0221049   |
| 219168_s_  | proline rich 5 (renal)                       | PRR5      | 0.0120608   |
| 239014_at  | Cell division cycle and apoptosis regulator  | CCAR1     | 0.00774426  |
| 201645_at  | tenascin C (hexabrachion)                    | TNC       | 0.00101263  |
| 226299_at  | protein kinase N3                            | PKN3      | 0.000139449 |
| 225531_at  | Cdk5 and Abl enzyme substrate 1              | CABLES1   | 0.0011324   |
| 1552680_a  | cancer susceptibility candidate 5            | CASC5     | 0.00369917  |
| 1559117_at | CDNA FLJ34664 fis, clone LIVER2000592        | ---       | 0.00060772  |
| 204908_s_  | B-cell CLL/lymphoma 3                        | BCL3      | 0.00319308  |
| 228044_at  | stress-associated endoplasmic reticulum p    | SERP2     | 0.00382643  |
| 205696_s_  | GDNF family receptor alpha 1                 | GFRA1     | 0.0143426   |
| 208614_s_  | filamin B, beta (actin binding protein 278)  | FLNB      | 0.000122279 |
| 224061_at  | indolethylamine N-methyltransferase          | INMT      | 0.000875298 |
| 226474_at  | NLR family, CARD domain containing 5         | NLRC5     | 0.00132903  |
| 1553778_a  | Williams Beuren syndrome chromosome r        | WBSCR27   | 0.000236394 |
| 1561775_a  | ---                                          | ---       | 0.0494676   |
| 226252_at  | CDNA FLJ34585 fis, clone KIDNE200875i        | ---       | 0.00168384  |
| 241762_at  | F-box protein 32                             | FBXO32    | 0.0140194   |
| 228152_s_  | DEAD (Asp-Glu-Ala-Asp) box polypeptide       | DDX60L    | 0.0125638   |
| 232396_at  | MRNA full length insert cDNA clone EURC      | ---       | 0.00243484  |
| 205034_at  | cyclin E2                                    | CCNE2     | 0.0268632   |
| 213822_s_  | ubiquitin protein ligase E3B                 | UBE3B     | 0.000357856 |
| 36711_at   | v-maf musculoaponeurotic fibrosarcoma o      | MAFF      | 2.27E-05    |
| 219203_at  | chromosome 14 open reading frame 122         | C14orf122 | 0.00300456  |
| 227376_at  | GLI-Kruppel family member GLI3 (Greig c      | GLI3      | 0.00431039  |
| 243296_at  | Nicotinamide phosphoribosyltransferase       | NAMPT     | 0.00454309  |
| 225894_at  | synaptopodin 2                               | SYNPO2    | 0.000398436 |
| 210375_at  | prostaglandin E receptor 3 (subtype EP3)     | PTGER3    | 0.00594996  |
| 211799_x_  | major histocompatibility complex, class I, ( | HLA-C     | 0.000643785 |
| 229026_at  | Transcribed locus                            | ---       | 0.0194307   |
| 218066_at  | solute carrier family 12 (potassium/chlorid  | SLC12A7   | 0.00216525  |
| 228617_at  | XIAP associated factor 1                     | XAF1      | 0.0105359   |
| 234095_at  | CDNA FLJ13274 fis, clone OVARC100102         | ---       | 0.00560518  |
| 204580_at  | matrix metalloproteinase 12 (macrophage      | MMP12     | 0.00219174  |
| 204159_at  | cyclin-dependent kinase inhibitor 2C (p18,   | CDKN2C    | 0.0064833   |
| 213556_at  | similar to R28379_1                          | LOC390940 | 0.000276456 |
| 232263_at  | solute carrier family 6, member 15           | SLC6A15   | 0.00201564  |
| 222830_at  | grainyhead-like 1 (Drosophila)               | GRHL1     | 0.0010831   |
| 238069_at  | CDNA: FLJ21968 fis, clone HEP05670           | ---       | 0.000712602 |
| 242363_at  | Transcribed locus                            | ---       | 0.000693045 |
| 230036_at  | sterile alpha motif domain containing 9-like | SAMD9L    | 0.00360549  |
| 214022_s_  | interferon induced transmembrane protein     | IFITM1    | 0.00250266  |
| 219488_at  | alpha 1,4-galactosyltransferase (globotria   | A4GALT    | 0.00585711  |
| 226743_at  | schlafen family member 11                    | SLFN11    | 0.00429035  |

|            |                                                |              |             |
|------------|------------------------------------------------|--------------|-------------|
| 203689_s_  | fragile X mental retardation 1                 | FMR1         | 0.000248765 |
| 206364_at  | kinesin family member 14                       | KIF14        | 0.0364379   |
| 202589_at  | thymidylate synthetase                         | TYMS         | 0.00846862  |
| 217482_at  | CDNA FLJ11925 fis, clone HEMBB10003f           | ---          | 0.000703807 |
| 208944_at  | transforming growth factor, beta receptor I    | TGFB2        | 0.00279613  |
| 222303_at  | ---                                            | ---          | 0.00236147  |
| 220941_s_  | chromosome 21 open reading frame 91            | C21orf91     | 0.000494978 |
| 208079_s_  | aurora kinase A                                | AURKA        | 0.0272562   |
| 228766_at  | ---                                            | ---          | 0.0165698   |
| 238669_at  | prostaglandin-endoperoxide synthase 1 (p       | PTGS1        | 0.00248779  |
| 210735_s_  | carbonic anhydrase XII                         | CA12         | 0.00163227  |
| 204603_at  | exonuclease 1                                  | EXO1         | 0.0074071   |
| 220639_at  | transmembrane 4 L six family member 20         | TM4SF20      | 0.0140962   |
| 38158_at   | extra spindle pole bodies homolog 1 (S. c      | ESPL1        | 0.00350355  |
| 204254_s_  | vitamin D (1,25- dihydroxyvitamin D3) rec      | VDR          | 1.02E-05    |
| 223842_s_  | scavenger receptor class A, member 3           | SCARA3       | 0.0256031   |
| 222101_s_  | dachsous 1 (Drosophila)                        | DCHS1        | 0.00430393  |
| 228462_at  | iroquois homeobox 2                            | IRX2         | 0.000504559 |
| 240815_at  | Transcribed locus                              | ---          | 0.00298998  |
| 218663_at  | non-SMC condensin I complex, subunit G         | NCAPG        | 0.0334103   |
| 1559063_a  | EST from clone 79282, full insert              | ---          | 0.000109731 |
| 214710_s_  | cyclin B1                                      | CCNB1        | 0.0284429   |
| 213931_at  | inhibitor of DNA binding 2, dominant nega      | ID2 /// ID2B | 0.0180288   |
| 209182_s_  | chromosome 10 open reading frame 10            | C10orf10     | 0.00564215  |
| 214329_x_  | tumor necrosis factor (ligand) superfamily,    | TNFSF10      | 0.0105991   |
| 227384_s_  | hypothetical protein LOC727820                 | LOC727820    | 0.000617803 |
| 225955_at  | meteorin, glial cell differentiation regulator | LOC653506    | 8.83E-05    |
| 204709_s_  | kinesin family member 23                       | KIF23        | 0.0302267   |
| 235594_at  | Small inducible cytokine subfamily E, mem      | SCYE1        | 0.000688533 |
| 215723_s_  | phospholipase D1, phosphatidylcholine-sp       | PLD1         | 0.00405365  |
| 238226_at  | family with sequence similarity 70, membe      | FAM70B       | 0.000863432 |
| 218039_at  | nucleolar and spindle associated protein 1     | NUSAP1       | 0.04283     |
| 233425_at  | ---                                            | ---          | 0.000289015 |
| 208116_s_  | mannosidase, alpha, class 1A, member 1         | MAN1A1       | 0.00398682  |
| 226055_at  | arrestin domain containing 2                   | ARRDC2       | 0.000213668 |
| 1558636_s_ | ADAM metallopeptidase with thrombospor         | ADAMTS5      | 0.0322906   |
| 209493_at  | PDZ domain containing 2                        | PDZD2        | 0.0492541   |
| 227082_at  | MRNA; cDNA DKFZp586K1922 (from clon            | ---          | 0.00313456  |
| 212949_at  | non-SMC condensin I complex, subunit H         | NCAPH        | 0.00941409  |
| 229656_s_  | similar to echinoderm microtubule associa      | FLJ42562     | 0.0102358   |
| 225720_at  | synaptopodin 2                                 | SYNPO2       | 0.000179037 |
| 211896_s_  | decorin                                        | DCN          | 0.00482066  |
| 230864_at  | hypothetical protein MGC42105                  | MGC42105     | 0.00655412  |
| 238800_s_  | Zinc finger, CCHC domain containing 6          | ZCCHC6       | 0.000308323 |
| 201140_s_  | RAB5C, member RAS oncogene family              | RAB5C        | 0.000449323 |
| 202895_s_  | signal-regulatory protein alpha                | SIRPA        | 0.0140593   |
| 219200_at  | FAST kinase domains 3                          | FASTKD3      | 0.000137704 |
| 223092_at  | ankylosis, progressive homolog (mouse)         | ANKH         | 0.000138874 |
| 235190_at  | Transcribed locus                              | ---          | 0.000443004 |
| 203888_at  | thrombomodulin                                 | THBD         | 0.0103742   |
| 212770_at  | transducin-like enhancer of split 3 (E(sp1)    | TLE3         | 0.00101754  |
| 209234_at  | kinesin family member 1B                       | KIF1B        | 0.000245038 |
| 209011_at  | triple functional domain (PTPRF interactin     | LOC100137    | 0.00173918  |

|             |                                                        |             |             |
|-------------|--------------------------------------------------------|-------------|-------------|
| 213749_at   | mannan-binding lectin serine peptidase 1               | MASP1       | 0.0029105   |
| 202889_x_s  | microtubule-associated protein 7                       | MAP7        | 2.11E-05    |
| 215240_at   | integrin, beta 3 (platelet glycoprotein IIIa, alpha 3) | ITGB3       | 8.53E-05    |
| 1560680_a   | Transcribed locus, moderately similar to N-            | ---         | 0.00312443  |
| 201348_at   | glutathione peroxidase 3 (plasma)                      | GPX3        | 0.0164575   |
| 205303_at   | potassium inwardly-rectifying channel, subunit 8       | KCNJ8       | 0.0109176   |
| 228143_at   | ceruloplasmin (ferroxidase) /// similar to C-          | CP /// LOC- | 0.00992146  |
| 211502_s_s  | PFTAIRE protein kinase 1                               | PFTK1       | 0.000999222 |
| 203435_s_s  | membrane metallo-endopeptidase                         | MME         | 0.000401529 |
| 223467_at   | RAS, dexamethasone-induced 1                           | RASD1       | 6.95E-05    |
| 229641_at   | Transcribed locus                                      | ---         | 0.000501155 |
| 228323_at   | cancer susceptibility candidate 5                      | CASC5       | 0.0285055   |
| 208070_s_s  | REV3-like, catalytic subunit of DNA polymerase beta    | REV3L       | 0.00155584  |
| 1553313_s_s | solute carrier family 5 (inositol transporters)        | SLC5A3      | 0.00829315  |
| 222608_s_s  | anillin, actin binding protein                         | ANLN        | 0.0476344   |
| 219493_at   | SHC SH2-domain binding protein 1                       | SHCBP1      | 0.0206835   |
| 206765_at   | potassium inwardly-rectifying channel, subunit 2       | KCNJ2       | 1.01E-05    |
| 229534_at   | acyl-CoA thioesterase 4                                | ACOT4       | 0.00386098  |
| 230372_at   | Hyaluronan synthase 2                                  | HAS2        | 0.0170597   |
| 225415_at   | deltex 3-like (Drosophila)                             | DTX3L       | 0.00692013  |
| 215509_s_s  | BUB1 budding uninhibited by benzimidazole 1            | BUB1        | 0.0247553   |
| 212020_s_s  | antigen identified by monoclonal antibody              | MKI67       | 0.00406333  |
| 225173_at   | Rho GTPase activating protein 18                       | ARHGAP18    | 0.00139237  |
| 1557810_a   | Clone HEA5 Cri-du-chat critical region mapped to       | ---         | 0.000159554 |
| 222731_at   | zinc finger, DHHC-type containing 2                    | ZDHHC2      | 0.000227827 |
| 226250_at   | CDNA FLJ34585 fis, clone KIDNE200875i                  | ---         | 1.01E-05    |
| 215172_at   | protein tyrosine phosphatase, non-receptor type 22     | PTPN20A //  | 5.26E-07    |
| 205003_at   | dedicator of cytokinesis 4                             | DOCK4       | 0.00102142  |
| 231773_at   | angiopoietin-like 1                                    | ANGPTL1     | 0.00113519  |
| 202412_s_s  | ubiquitin specific peptidase 1                         | USP1        | 0.00114846  |
| 219902_at   | betaine-homocysteine methyltransferase 2               | BHMT2       | 0.00036062  |
| 234269_at   | CDNA FLJ20012 fis, clone ADKA03438                     | ---         | 0.000336755 |
| 201272_at   | aldo-keto reductase family 1, member B1                | AKR1B1      | 0.0045023   |
| 236000_s_s  | Transcribed locus                                      | ---         | 6.58E-06    |
| 229429_x_s  | family with sequence similarity 91, member 1           | FAM91A2     | 0.00177902  |
| 1556606_a   | neuron navigator 2                                     | NAV2        | 0.00268994  |
| 227959_at   | Transcribed locus, weakly similar to XP_0-             | ---         | 0.00977339  |
| 225946_at   | Ras association (RalGDS/AF-6) domain family 8          | RASSF8      | 2.40E-05    |
| 219403_s_s  | heparanase                                             | HPSE        | 6.70E-05    |
| 203434_s_s  | membrane metallo-endopeptidase                         | MME         | 8.38E-05    |
| 201329_s_s  | v-ets erythroblastosis virus E26 oncogene              | ETS2        | 0.00548814  |
| 228523_at   | nanos homolog 1 (Drosophila)                           | NANOS1      | 0.0188903   |
| 203764_at   | discs, large homolog 7 (Drosophila)                    | DLG7        | 0.0251932   |
| 202446_s_s  | phospholipid scramblase 1                              | PLSCR1      | 0.0156625   |
| 207828_s_s  | centromere protein F, 350/400ka (mitosin)              | CENPF       | 0.0236116   |
| 203765_at   | granulysin, EF-hand calcium binding protein            | GCA         | 0.00416875  |
| 204508_s_s  | carbonic anhydrase XII                                 | CA12        | 0.00177206  |
| 202954_at   | ubiquitin-conjugating enzyme E2C                       | UBE2C       | 0.0154838   |
| 220651_s_s  | minichromosome maintenance complex component 6         | MCM10       | 0.0465039   |
| 224534_at   | kringle containing transmembrane protein               | KREMEN1     | 0.00235893  |
| 209013_x_s  | triple functional domain (PTPRF interacting)           | TRIO        | 0.00138919  |
| 209193_at   | pim-1 oncogene                                         | PIM1        | 0.0080629   |
| 219594_at   | ninjurin 2                                             | NINJ2       | 0.000159467 |

|           |                                                               |              |             |
|-----------|---------------------------------------------------------------|--------------|-------------|
| 202760_s_ | PALM2-AKAP2                                                   | PALM2-AKAP2  | 0.00086021  |
| 204735_at | phosphodiesterase 4A, cAMP-specific (phosphodiesterase 4A)    | PDE4A        | 0.00132608  |
| 232238_at | asp (abnormal spindle) homolog, microcephaly-associated 1     | ASPM         | 0.00787771  |
| 229824_at | CDNA FLJ45325 fis, clone BRHIP300671                          | ---          | 0.0118313   |
| 203585_at | zinc finger protein 185 (LIM domain)                          | ZNF185       | 0.0049604   |
| 201291_s_ | topoisomerase (DNA) II alpha 170kDa                           | TOP2A        | 0.0458221   |
| 205945_at | interleukin 6 receptor                                        | IL6R         | 0.000201363 |
| 236947_at | Transcribed locus                                             | ---          | 0.000240013 |
| 226034_at | Homo sapiens, clone IMAGE:3881549, mapped                     | ---          | 0.00771801  |
| 228573_at | Transcribed locus                                             | ---          | 0.000161695 |
| 238751_at | CDNA clone IMAGE:4791597                                      | ---          | 0.012394    |
| 227452_at | CDNA FLJ26252 fis, clone DMC03335                             | ---          | 0.00426557  |
| 226636_at | phospholipase D1, phosphatidylcholine-specific                | PLD1         | 0.00420614  |
| 203865_s_ | adenosine deaminase, RNA-specific, B1 (adenosine deaminase 1) | ADARB1       | 0.0358167   |
| 213131_at | olfactomedin 1                                                | OLFM1        | 0.00189391  |
| 224461_s_ | apoptosis-inducing factor, mitochondrion-associated 2         | AIFM2        | 0.000495921 |
| 207233_s_ | microphthalmia-associated transcription factor 1              | MITF         | 0.00890918  |
| 241703_at | RUN domain containing 3B                                      | RUNDC3B      | 0.00124424  |
| 209583_s_ | CD200 molecule                                                | CD200        | 0.0317037   |
| 232278_s_ | DEP domain containing 1                                       | DEPDC1       | 0.0229393   |
| 1554408_a | thymidine kinase 1, soluble                                   | TK1          | 0.0228817   |
| 227259_at | CD47 molecule                                                 | CD47         | 0.000919645 |
| 217130_at | chromosome 9 open reading frame 33                            | C9orf33      | 0.00379203  |
| 204748_at | prostaglandin-endoperoxide synthase 2 (cyclooxygenase 2)      | PTGS2        | 0.00979448  |
| 214091_s_ | glutathione peroxidase 3 (plasma)                             | GPX3         | 0.0134431   |
| 218986_s_ | DEAD (Asp-Glu-Ala-Asp) box polypeptide 60                     | DDX60        | 0.00744437  |
| 229797_at | mucolin 3                                                     | MCOLN3       | 0.0016909   |
| 228531_at | sterile alpha motif domain containing 9                       | SAMD9        | 0.00231659  |
| 202901_x_ | cathepsin S                                                   | CTSS         | 0.0133992   |
| 212769_at | transducin-like enhancer of split 3 (E(sp1))                  | TLE3         | 2.26E-06    |
| 212886_at | coiled-coil domain containing 69                              | CCDC69       | 0.00040884  |
| 1552455_a | prune homolog 2 (Drosophila)                                  | PRUNE2       | 0.000744871 |
| 205289_at | bone morphogenetic protein 2                                  | BMP2         | 0.0341181   |
| 218542_at | centrosomal protein 55kDa                                     | CEP55        | 0.0299661   |
| 239185_at | ATP-binding cassette, sub-family A (ABC1)                     | ABCA9        | 0.000232482 |
| 227265_at | fibrinogen-like 2                                             | FGL2         | 0.00268432  |
| 218662_s_ | non-SMC condensin I complex, subunit G                        | NCAPG        | 0.0369285   |
| 205559_s_ | proprotein convertase subtilisin/kexin type 5                 | PCSK5        | 0.0120825   |
| 204014_at | dual specificity phosphatase 4                                | DUSP4        | 0.00896898  |
| 203835_at | leucine rich repeat containing 32                             | LRRC32       | 9.84E-05    |
| 212392_s_ | phosphodiesterase 4D interacting protein                      | LOC652526    | 0.000966371 |
| 202732_at | protein kinase (cAMP-dependent, catalytic)                    | PKIG         | 0.0117492   |
| 207388_s_ | prostaglandin E synthase                                      | PTGES        | 0.000420517 |
| 229068_at | chaperonin containing TCP1, subunit 5 (epsilon)               | CCT5         | 8.46E-05    |
| 203200_s_ | 5-methyltetrahydrofolate-homocysteine methyltransferase       | MTRR         | 3.33E-05    |
| 221801_x_ | neurofilament, light polypeptide 68kDa                        | NEFL         | 0.00059889  |
| 224770_s_ | neuron navigator 1                                            | NAV1         | 0.000707851 |
| 202241_at | tribbles homolog 1 (Drosophila)                               | TRIB1        | 0.00275581  |
| 1553589_a | PDZK1 interacting protein 1                                   | PDZK1IP1     | 0.000666866 |
| 240407_at | hypothetical LOC100126784                                     | LOC100126784 | 0.00482287  |
| 206133_at | XIAP associated factor 1                                      | XAF1         | 0.00106923  |
| 232120_at | CDNA FLJ14259 fis, clone PLACE100107                          | ---          | 7.59E-05    |
| 213007_at | Fanconi anemia, complementation group I                       | FANCI        | 0.0122748   |



|           |                                                  |           |             |
|-----------|--------------------------------------------------|-----------|-------------|
| 209348_s_ | v-maf musculoaponeurotic fibrosarcoma o          | MAF       | 0.00439048  |
| 205046_at | centromere protein E, 312kDa                     | CENPE     | 0.0147943   |
| 212822_at | HEG homolog 1 (zebrafish)                        | HEG1      | 0.00058387  |
| 219011_at | pleckstrin homology domain containing, fa        | PLEKHA4   | 0.00342707  |
| 1555758_a | cyclin-dependent kinase inhibitor 3 (CDK2        | CDKN3     | 0.0129636   |
| 226433_at | ring finger protein 157                          | RNF157    | 0.000467861 |
| 202986_at | aryl-hydrocarbon receptor nuclear transloc       | ARNT2     | 3.69E-05    |
| 219935_at | ADAM metallopeptidase with thrombospor           | ADAMTS5   | 0.0147308   |
| 228636_at | basic helix-loop-helix domain containing, c      | BHLHB5    | 0.0231697   |
| 1561908_a | Heparan sulfate (glucosamine) 3-O-sulfotr        | HS3ST3B1  | 0.000435658 |
| 219062_s_ | zinc finger, CCHC domain containing 2            | ZCCHC2    | 0.000629896 |
| 1553102_a | coiled-coil domain containing 69                 | CCDC69    | 0.00145579  |
| 232618_at | chromosome Y open reading frame 15A              | CYorf15A  | 1.46E-05    |
| 204135_at | filamin A interacting protein 1-like             | FILIP1L   | 0.000221374 |
| 231218_at | Transcribed locus                                | ---       | 0.000431423 |
| 241897_at | ---                                              | ---       | 0.000776008 |
| 210155_at | myocilin, trabecular meshwork inducible g        | MYOC      | 0.00269018  |
| 209012_at | triple functional domain (PTPRF interactin       | TRIO      | 0.0053525   |
| 239786_at | Transcribed locus                                | ---       | 0.00086576  |
| 204315_s_ | G-2 and S-phase expressed 1                      | GTSE1     | 0.0153006   |
| 202094_at | baculoviral IAP repeat-containing 5 (surviv      | BIRC5     | 0.0143053   |
| 204015_s_ | dual specificity phosphatase 4                   | DUSP4     | 0.00649385  |
| 205668_at | lymphocyte antigen 75                            | LY75      | 0.00513453  |
| 225491_at | solute carrier family 1 (glial high affinity glt | SLC1A2    | 0.0361921   |
| 230741_at | Full length insert cDNA clone YX74D05            | ---       | 0.00699084  |
| 235008_at | CDNA FLJ25241 fis, clone STM02689                | ---       | 0.00493345  |
| 225990_at | Boc homolog (mouse)                              | BOC       | 6.50E-05    |
| 239340_at | Transcribed locus                                | ---       | 0.00820457  |
| 213464_at | SHC (Src homology 2 domain containing)           | SHC2      | 0.019237    |
| 229432_at | N-acetylglutamate synthase                       | NAGS      | 0.00196276  |
| 201156_s_ | RAB5C, member RAS oncogene family                | RAB5C     | 0.000345023 |
| 233607_at | CDNA FLJ11739 fis, clone HEMBA10054              | ---       | 0.000568526 |
| 207165_at | hyaluronan-mediated motility receptor (RH        | HMMR      | 0.0101429   |
| 206279_at | protein kinase, Y-linked                         | PRKY      | 0.000489479 |
| 227419_x_ | placenta-specific 9                              | PLAC9     | 0.00548045  |
| 222817_at | hydroxy-delta-5-steroid dehydrogenase, 3         | HSD3B7    | 0.000215693 |
| 205345_at | BRCA1 associated RING domain 1                   | BARD1     | 0.0171235   |
| 207836_s_ | RNA binding protein with multiple splicing       | RBPMS     | 0.00363621  |
| 232716_at | CDNA FLJ11971 fis, clone HEMBB10012              | ---       | 0.00292192  |
| 213375_s_ | NEDD4 binding protein 2-like 1                   | N4BP2L1   | 0.00116083  |
| 222793_at | DEAD (Asp-Glu-Ala-Asp) box polypeptide           | DDX58     | 0.0134234   |
| 214734_at | exophilin 5                                      | EXPH5     | 0.00882496  |
| 212067_s_ | complement component 1, r subcomponent           | C1R       | 0.0083799   |
| 219044_at | threonine synthase-like 2 (S. cerevisiae)        | THNSL2    | 0.000529659 |
| 225524_at | anthrax toxin receptor 2                         | ANTXR2    | 0.000154285 |
| 240809_at | chromosome 21 open reading frame 121             | C21orf121 | 0.000836321 |
| 210087_s_ | myelin protein zero-like 1                       | MPZL1     | 1.77E-05    |
| 202466_at | polymerase (DNA directed) sigma                  | POLS      | 0.000317649 |
| 225687_at | family with sequence similarity 83, membe        | FAM83D    | 0.0172628   |
| 203139_at | death-associated protein kinase 1                | DAPK1     | 0.0337024   |
| 231972_at | CDNA: FLJ21028 fis, clone CAE07155               | ---       | 0.00171634  |
| 223094_s_ | ankylosis, progressive homolog (mouse)           | ANKH      | 0.00101912  |
| 239167_at | Transcribed locus                                | ---       | 0.00298781  |

|            |                                                          |              |             |
|------------|----------------------------------------------------------|--------------|-------------|
| 210454_s_  | potassium inwardly-rectifying channel, subunit 6         | KCNJ6        | 0.0192892   |
| 219588_s_  | non-SMC condensin II complex, subunit G                  | NCAPG2       | 0.0131429   |
| 216261_at  | integrin, beta 3 (platelet glycoprotein IIIa, alpha 3)   | ITGB3        | 0.00182203  |
| 203755_at  | BUB1 budding uninhibited by benzimidazole 1              | BUB1B        | 0.0124009   |
| 1555935_s_ | hormonally upregulated Neu-associated kinase             | HUNK         | 0.00140952  |
| 220484_at  | mucolipin 3                                              | MCOLN3       | 0.0164271   |
| 236243_at  | Zinc finger, CCHC domain containing 6                    | ZCCHC6       | 2.05E-05    |
| 212268_at  | serpin peptidase inhibitor, clade B (ovalbumin)          | SERPINB1     | 4.66E-05    |
| 218308_at  | transforming, acidic coiled-coil containing 3            | TACC3        | 0.00380731  |
| 235182_at  | chromosome 20 open reading frame 82                      | C20orf82     | 0.000509876 |
| 232027_at  | spectrin repeat containing, nuclear envelope             | SYNE1        | 0.00372152  |
| 225046_at  | hypothetical protein LOC100132181                        | LOC100132181 | 0.0204583   |
| 1560826_a  | CDNA clone IMAGE:4151535                                 | ---          | 0.00694149  |
| 201983_s_  | epidermal growth factor receptor (erythrocyte)           | EGFR         | 0.00365048  |
| 219229_at  | solute carrier organic anion transporter family 3        | SLCO3A1      | 0.00178317  |
| 206271_at  | toll-like receptor 3                                     | TLR3         | 0.000863886 |
| 227394_at  | neural cell adhesion molecule 1                          | NCAM1        | 0.010189    |
| 219306_at  | kinesin family member 15                                 | KIF15        | 0.00709666  |
| 211519_s_  | kinesin family member 2C                                 | KIF2C        | 0.0113515   |
| 221760_at  | Mannosidase, alpha, class 1A, member 1                   | MAN1A1       | 0.0030417   |
| 242961_x_  | DEAD (Asp-Glu-Ala-Asp) box polypeptide                   | DDX58        | 0.00269403  |
| 203145_at  | sperm associated antigen 5                               | SPAG5        | 0.00575548  |
| 244579_at  | Transcribed locus                                        | ---          | 1.43E-05    |
| 230360_at  | gliomedin                                                | GLDN         | 0.00085012  |
| 213125_at  | olfactomedin-like 2B                                     | OLFML2B      | 0.0135399   |
| 213256_at  | membrane-associated ring finger (C3HC4 domain)           | LOC100132181 | 0.0022889   |
| 218726_at  | Holliday junction recognition protein                    | HJURP        | 0.00734757  |
| 225532_at  | Cdk5 and Abl enzyme substrate 1                          | CABLES1      | 0.000110911 |
| 227083_at  | beta 1,3-galactosyltransferase-like                      | B3GALTL      | 2.53E-05    |
| 217590_s_  | transient receptor potential cation channel              | TRPA1        | 0.00371432  |
| 243048_at  | cat eye syndrome chromosome region, candidate 7          | CECR7        | 0.000115977 |
| 1570360_s_ | DEAD (Asp-Glu-Ala-Asp) box polypeptide                   | DDX3Y /// L  | 0.00102764  |
| 233044_at  | CDNA FLJ12308 fis, clone MAMMA10019                      | ---          | 0.000105261 |
| 243907_at  | Transcribed locus                                        | ---          | 0.0014688   |
| 227209_at  | Contactin 1                                              | CNTN1        | 0.0181718   |
| 206377_at  | forkhead box F2                                          | FOXF2        | 0.000847709 |
| 213757_at  | Transcribed locus, weakly similar to XP_00110138         | ---          | 0.00010138  |
| 226930_at  | fibronectin type III domain containing 1                 | FNDC1        | 0.0042484   |
| 209714_s_  | cyclin-dependent kinase inhibitor 3 (CDK2)               | CDKN3        | 0.0132235   |
| 220034_at  | interleukin-1 receptor-associated kinase 3               | IRAK3        | 0.0018898   |
| 218309_at  | calcium/calmodulin-dependent protein kinase 2            | CAMK2N1      | 0.00546105  |
| 232024_at  | GTPase, IMAP family member 2                             | GIMAP2       | 0.000792575 |
| 204806_x_  | major histocompatibility complex, class I, HLA-F         | HLA-F        | 9.59E-05    |
| 221875_x_  | major histocompatibility complex, class I, HLA-F         | HLA-F        | 0.000192881 |
| 213909_at  | leucine rich repeat containing 15                        | LRRC15       | 0.000979521 |
| 226955_at  | actin filament associated protein 1-like 1               | AFAP1L1      | 0.000223886 |
| 206631_at  | prostaglandin E receptor 2 (subtype EP2)                 | PTGER2       | 0.00158312  |
| 205128_x_  | prostaglandin-endoperoxide synthase 1 (cyclooxygenase 1) | PTGS1        | 6.64E-05    |
| 202723_s_  | forkhead box O1                                          | FOXO1        | 0.00538917  |
| 216941_s_  | TATA box binding protein (TBP)-associated factor 1       | TAF1B        | 0.0012758   |
| 1556329_a  | CDNA clone IMAGE:5301690                                 | ---          | 0.00183823  |
| 212946_at  | KIAA0564                                                 | KIAA0564     | 0.00655876  |
| 213791_at  | proenkephalin                                            | PENK         | 0.0031265   |

|           |                                                                   |           |             |
|-----------|-------------------------------------------------------------------|-----------|-------------|
| 236926_at | T-box 1                                                           | TBX1      | 7.95E-05    |
| 235086_at | Thrombospondin 1                                                  | THBS1     | 0.00864128  |
| 205304_s_ | potassium inwardly-rectifying channel, subunit 8                  | KCNJ8     | 0.00215557  |
| 226397_s_ | CDNA: FLJ21028 fis, clone CAE07155                                | ---       | 0.00243013  |
| 218755_at | kinesin family member 20A                                         | KIF20A    | 0.0301367   |
| 224999_at | Placenta mRNA, clone PL45, partial sequence                       | ---       | 5.12E-05    |
| 228155_at | chromosome 10 open reading frame 58                               | C10orf58  | 0.0227382   |
| 236114_at | Transcribed locus                                                 | ---       | 0.00210214  |
| 225380_at | hypothetical protein BC007901                                     | LOC91461  | 0.00443274  |
| 223274_at | transcription factor 19 (SC1)                                     | TCF19     | 0.00978452  |
| 1569342_a | GLI-Kruppel family member GLI3 (Greig syndrome)                   | GLI3      | 6.43E-05    |
| 239587_at | Transcribed locus                                                 | ---       | 0.00584814  |
| 213071_at | dermatopontin                                                     | DPT       | 0.0355208   |
| 203788_s_ | sema domain, immunoglobulin domain (Ig domain)                    | SEMA3C    | 1.56E-05    |
| 230475_at | similar to RIKEN cDNA 6030419C18 gene                             | LOC388133 | 0.00221426  |
| 208747_s_ | complement component 1, subcomponent 1                            | C1S       | 0.00453159  |
| 202890_at | microtubule-associated protein 7                                  | MAP7      | 0.00382323  |
| 235019_at | carboxypeptidase M                                                | CPM       | 0.000516911 |
| 204187_at | guanosine monophosphate reductase                                 | GMPR      | 0.00177779  |
| 231973_s_ | anaphase promoting complex subunit 1                              | ANAPC1    | 0.000269815 |
| 211149_at | ubiquitously transcribed tetratricopeptide repeat                 | LOC100133 | 6.67E-05    |
| 230319_at | CDNA FLJ36413 fis, clone THYMU20108                               | ---       | 0.00295311  |
| 203886_s_ | fibulin 2                                                         | FBLN2     | 0.00190232  |
| 209687_at | chemokine (C-X-C motif) ligand 12 (stromal cell derived factor 1) | CXCL12    | 0.000119821 |
| 224937_at | prostaglandin F2 receptor negative regulator 1                    | PTGFRN    | 0.0133572   |
| 235088_at | hypothetical protein LOC201725                                    | LOC201725 | 0.00031198  |
| 229070_at | chromosome 6 open reading frame 105                               | C6orf105  | 0.0100242   |
| 1553243_a | inter-alpha (globulin) inhibitor H5                               | ITIH5     | 0.000270955 |
| 1553129_a | sushi, von Willebrand factor type A, EGF repeat domain 1          | SVEP1     | 1.16E-05    |
| 236641_at | kinesin family member 14                                          | KIF14     | 0.0195887   |
| 239706_x_ | Transcribed locus                                                 | ---       | 0.000536394 |
| 209709_s_ | hyaluronan-mediated motility receptor (RHAMM)                     | HMMR      | 0.00790852  |
| 238577_s_ | Teashirt zinc finger homeobox 2                                   | TSHZ2     | 0.000167512 |
| 213122_at | TSPY-like 5                                                       | TSPYL5    | 0.00247258  |
| 224341_x_ | toll-like receptor 4                                              | TLR4      | 0.00167171  |
| 221841_s_ | Kruppel-like factor 4 (gut)                                       | KLF4      | 0.00168486  |
| 209928_s_ | musculin (activated B-cell factor-1)                              | MSC       | 0.0146815   |
| 1552619_a | anillin, actin binding protein                                    | ANLN      | 0.0202964   |
| 204591_at | cell adhesion molecule with homology to L1                        | CHL1      | 0.00728325  |
| 212022_s_ | antigen identified by monoclonal antibody                         | MKI67     | 0.035627    |
| 214131_at | chromosome Y open reading frame 15B                               | CYorf15B  | 0.000770431 |
| 204858_s_ | thymidine phosphorylase                                           | TYMP      | 1.50E-05    |
| 225868_at | tripartite motif-containing 47                                    | TRIM47    | 0.0181127   |
| 225817_at | cingulin-like 1                                                   | CGNL1     | 0.012685    |
| 208613_s_ | filamin B, beta (actin binding protein 278)                       | FLNB      | 0.000459186 |
| 239942_at | Transcribed locus                                                 | ---       | 0.00460812  |
| 231925_at | CDNA: FLJ23006 fis, clone LNG00414                                | ---       | 0.000379433 |
| 210305_at | phosphodiesterase 4D interacting protein                          | PDE4DIP   | 0.00472712  |
| 211062_s_ | carboxypeptidase Z                                                | CPZ       | 0.00261938  |
| 234987_at | Transcribed locus                                                 | ---       | 0.011621    |
| 202994_s_ | fibulin 1                                                         | FBLN1     | 0.00197431  |
| 218638_s_ | spondin 2, extracellular matrix protein                           | SPON2     | 0.00700382  |
| 229305_at | MLF1 interacting protein                                          | MLF1IP    | 0.0261058   |

|            |                                              |           |             |
|------------|----------------------------------------------|-----------|-------------|
| 221523_s_  | Ras-related GTP binding D                    | RRAGD     | 0.0107573   |
| 231118_at  | ankyrin repeat domain 35                     | ANKRD35   | 0.0039464   |
| 1564378_a  | CDNA: FLJ21448 fis, clone COL04473           | ---       | 0.00238166  |
| 203037_s_  | metastasis suppressor 1                      | MTSS1     | 0.00334503  |
| 219528_s_  | B-cell CLL/lymphoma 11B (zinc finger prot    | BCL11B    | 6.24E-05    |
| 1555989_a  | Transcribed locus                            | ---       | 0.000853571 |
| 239583_x_  | placenta-specific 7                          | PLAC7     | 0.000977265 |
| 242055_at  | Transcribed locus                            | ---       | 0.000468911 |
| 218400_at  | 2'-5'-oligoadenylate synthetase 3, 100kDa    | OAS3      | 0.00767941  |
| 201890_at  | ribonucleotide reductase M2 polypeptide      | RRM2      | 0.020516    |
| 239022_at  | succinate dehydrogenase complex, subun       | SDHALP1   | 0.00387555  |
| 228195_at  | hypothetical protein MGC13057                | MGC13057  | 0.000234362 |
| 1554966_a  | filamin A interacting protein 1-like         | FILIP1L   | 8.97E-05    |
| 1554696_s_ | thymidylate synthetase                       | TYMS      | 0.010322    |
| 232615_at  | CDNA: FLJ22765 fis, clone KAIA1180           | ---       | 0.000824632 |
| 219209_at  | interferon induced with helicase C domain    | IFIH1     | 0.0203932   |
| 236901_at  | Transcribed locus                            | ---       | 0.00255182  |
| 209959_at  | nuclear receptor subfamily 4, group A, me    | NR4A3     | 0.00061914  |
| 223687_s_  | lymphocyte antigen 6 complex, locus K        | LY6K      | 1.26E-05    |
| 202995_s_  | fibulin 1                                    | FBLN1     | 0.00283353  |
| 218883_s_  | MLF1 interacting protein                     | MLF1IP    | 0.0204785   |
| 202295_s_  | cathepsin H                                  | CTSH      | 0.0272981   |
| 201924_at  | AF4/FMR2 family, member 1                    | AFF1      | 0.00124803  |
| 200923_at  | lectin, galactoside-binding, soluble, 3 bind | LGALS3BP  | 0.00312999  |
| 227607_at  | STAM binding protein-like 1                  | STAMBPL1  | 0.00257627  |
| 225540_at  | microtubule-associated protein 2             | MAP2      | 0.0499821   |
| 202481_at  | dehydrogenase/reductase (SDR family) m       | DHRS3     | 0.000300766 |
| 233011_at  | Annexin A1                                   | ANXA1     | 0.0010848   |
| 227250_at  | kringle containing transmembrane protein     | KREMEN1   | 2.68E-05    |
| 206632_s_  | apolipoprotein B mRNA editing enzyme, c      | APOBEC3E  | 0.00529155  |
| 204962_s_  | centromere protein A                         | CENPA     | 0.0112326   |
| 227145_at  | lysyl oxidase-like 4                         | LOXL4     | 0.00398377  |
| 201430_s_  | dihydropyrimidinase-like 3                   | DPYSL3    | 0.00405718  |
| 204317_at  | G-2 and S-phase expressed 1                  | GTSE1     | 0.00196197  |
| 229538_s_  | IQ motif containing GTPase activating pro    | IQGAP3    | 0.0235131   |
| 223484_at  | chromosome 15 open reading frame 48          | C15orf48  | 0.00093248  |
| 221901_at  | KIAA1644 protein                             | LL22NC03- | 6.41E-05    |
| 204614_at  | serpin peptidase inhibitor, clade B (ovalbu  | SERPINB2  | 0.00241448  |
| 219978_s_  | nucleolar and spindle associated protein 1   | NUSAP1    | 0.018981    |
| 224950_at  | prostaglandin F2 receptor negative regula    | PTGFRN    | 0.000396002 |
| 242794_at  | mastermind-like 3 (Drosophila)               | MAML3     | 0.00102148  |
| 241455_at  | Transcribed locus                            | ---       | 0.0039557   |
| 231828_at  | CDNA clone IMAGE:5218355                     | ---       | 0.000114137 |
| 213457_at  | malignant fibrous histiocytoma amplified s   | MFHAS1    | 7.89E-05    |
| 205347_s_  | thymosin-like 8 /// thymosin beta15b         | MGC39900  | 0.0083217   |
| 212843_at  | neural cell adhesion molecule 1              | NCAM1     | 0.00442576  |
| 219630_at  | PDZK1 interacting protein 1                  | PDZK1IP1  | 0.000385036 |
| 225325_at  | FLJ20160 protein                             | FLJ20160  | 0.0160941   |
| 204273_at  | endothelin receptor type B                   | EDNRB     | 0.00041345  |
| 227995_at  | MRNA; cDNA DKFZp564O0862 (from clor          | ---       | 0.00535172  |
| 229404_at  | twist homolog 2 (Drosophila)                 | TWIST2    | 0.000188429 |
| 206330_s_  | SHC (Src homology 2 domain containing)       | SHC3      | 0.00651784  |
| 233130_at  | CDNA FLJ12202 fis, clone MAMMA10009          | ---       | 0.00411807  |

|           |                                                               |             |             |
|-----------|---------------------------------------------------------------|-------------|-------------|
| 218355_at | kinesin family member 4A                                      | KIF4A       | 0.00206756  |
| 221524_s_ | Ras-related GTP binding D                                     | RRAGD       | 0.00528731  |
| 205100_at | glutamine-fructose-6-phosphate transaminase                   | GFPT2       | 0.00168892  |
| 210136_at | myelin basic protein                                          | MBP         | 0.0441277   |
| 207063_at | chromosome Y open reading frame 14                            | CYorf14     | 1.11E-05    |
| 226066_at | microphthalmia-associated transcription factor                | MITF        | 0.0088324   |
| 237953_at | ---                                                           | ---         | 0.000233766 |
| 212801_at | citron (rho-interacting, serine/threonine kinase)             | CIT         | 0.0038381   |
| 221087_s_ | apolipoprotein L, 3                                           | APOL3       | 0.00605574  |
| 229352_at | NADPH oxidase, EF-hand calcium binding domain                 | NOX5 /// SF | 0.000892555 |
| 227949_at | phosphatase and actin regulator 3                             | PHACTR3     | 0.0033788   |
| 204162_at | NDC80 homolog, kinetochore complex component                  | NDC80       | 0.0173635   |
| 203571_s_ | chromosome 10 open reading frame 116                          | C10orf116   | 0.0143633   |
| 203823_at | regulator of G-protein signaling 3                            | RGS3        | 0.00901786  |
| 225207_at | pyruvate dehydrogenase kinase, isozyme 4                      | PDK4        | 0.028869    |
| 202870_s_ | cell division cycle 20 homolog (S. cerevisiae)                | CDC20       | 0.0110838   |
| 228807_at | Transcribed locus                                             | ---         | 0.000297636 |
| 223646_s_ | chromosome Y open reading frame 15B                           | CYorf15B    | 0.00132998  |
| 209354_at | tumor necrosis factor receptor superfamily member 14          | TNFRSF14    | 0.000186203 |
| 210557_x_ | colony stimulating factor 1 (macrophage)                      | CSF1        | 0.00110798  |
| 202145_at | lymphocyte antigen 6 complex, locus E                         | LY6E        | 0.0034165   |
| 244804_at | Sequestosome 1                                                | SQSTM1      | 0.00352988  |
| 211991_s_ | major histocompatibility complex, class II, DPA1              | HLA-DPA1    | 0.00195874  |
| 209140_x_ | major histocompatibility complex, class I, B                  | HLA-B /// H | 0.000572644 |
| 204509_at | carbonic anhydrase XII                                        | CA12        | 0.000479351 |
| 225061_at | DnaJ (Hsp40) homolog, subfamily A, member 4                   | DNAJA4      | 0.000143203 |
| 219778_at | zinc finger protein, multitype 2                              | ZFPM2       | 0.000289125 |
| 202644_s_ | tumor necrosis factor, alpha-induced protein 3                | TNFAIP3     | 0.00275218  |
| 205542_at | six transmembrane epithelial antigen of the stomach 1         | STEAP1      | 0.000184575 |
| 229800_at | Doublecortin-like kinase 1                                    | DCLK1       | 0.000221206 |
| 230588_s_ | hypothetical protein LOC285074                                | LOC285074   | 0.000778975 |
| 212681_at | erythrocyte membrane protein band 4.1-like 3                  | EPB41L3     | 6.25E-06    |
| 1557570_a | hypothetical protein LOC285084                                | LOC285084   | 0.00426857  |
| 203508_at | tumor necrosis factor receptor superfamily member 1B          | TNFRSF1B    | 0.000117028 |
| 218404_at | sorting nexin 10                                              | SNX10       | 0.000846844 |
| 202869_at | 2',5'-oligoadenylate synthetase 1, 40/46kDa                   | OAS1        | 0.0179848   |
| 216526_x_ | major histocompatibility complex, class I, B                  | HLA-B /// H | 8.55E-06    |
| 213933_at | prostaglandin E receptor 3 (subtype EP3)                      | PTGER3      | 0.0074709   |
| 213197_at | astrotactin 1                                                 | ASTN1       | 0.00126877  |
| 1553572_a | cytoglobin                                                    | CYGB        | 0.00106032  |
| 224374_s_ | elastin microfibril interfacer 2                              | EMILIN2     | 3.73E-06    |
| 202948_at | interleukin 1 receptor, type I                                | IL1R1       | 0.00541884  |
| 209183_s_ | chromosome 10 open reading frame 10                           | C10orf10    | 0.00993392  |
| 225612_s_ | UDP-GlcNAc:betaGal beta-1,3-N-acetylglucosaminyltransferase 5 | B3GNT5      | 0.042753    |
| 227468_at | carnitine palmitoyltransferase 1C                             | CPT1C       | 0.000199378 |
| 215813_s_ | prostaglandin-endoperoxide synthase 1 (platelet)              | PTGS1       | 0.000127229 |
| 237372_at | Transcribed locus                                             | ---         | 0.00494459  |
| 204683_at | intercellular adhesion molecule 2                             | ICAM2       | 0.00697965  |
| 52837_at  | KIAA1644 protein                                              | LL22NC03-   | 0.000242922 |
| 209773_s_ | ribonucleotide reductase M2 polypeptide                       | RRM2        | 0.0125776   |
| 209642_at | BUB1 budding uninhibited by benzimidazole 1                   | BUB1        | 0.015667    |
| 233847_x_ | Uncharacterized gastric protein ZA31P                         | ---         | 0.0294928   |
| 1570155_a | Transcribed locus                                             | ---         | 0.00012932  |

|           |                                              |              |             |
|-----------|----------------------------------------------|--------------|-------------|
| 238015_at | hypothetical protein LOC201725               | LOC201725    | 0.00212392  |
| 215942_s  | G-2 and S-phase expressed 1                  | GTSE1        | 0.00805376  |
| 211911_x  | major histocompatibility complex, class I, I | FAM20B ///   | 0.000231708 |
| 209785_s  | phospholipase A2, group IVC (cytosolic, c    | PLA2G4C      | 0.000674107 |
| 206371_at | folate receptor 3 (gamma)                    | FOLR3        | 0.00314118  |
| 221886_at | DENN/MADD domain containing 2A               | DENND2A      | 0.000123159 |
| 208018_s  | hemopoietic cell kinase                      | HCK          | 0.0359005   |
| 227826_s  | CDNA clone IMAGE:4791597                     | ---          | 0.00833954  |
| 206432_at | hyaluronan synthase 2                        | HAS2         | 0.0107021   |
| 232224_at | mannan-binding lectin serine peptidase 1     | MASP1        | 0.000856411 |
| 219863_at | hect domain and RLD 5                        | HERC5        | 0.00114028  |
| 204318_s  | G-2 and S-phase expressed 1                  | GTSE1        | 0.0105525   |
| 213142_x  | hypothetical protein LOC54103                | tcag7.1314   | 0.000292819 |
| 242881_x  | Clone HLS_IMAGE_626842 mRNA seque            | ---          | 0.00544382  |
| 209821_at | interleukin 33                               | IL33         | 0.000710886 |
| 202391_at | brain abundant, membrane attached signa      | BASP1        | 6.99E-05    |
| 211809_x  | collagen, type XIII, alpha 1                 | COL13A1      | 0.000235774 |
| 235706_at | carboxypeptidase M                           | CPM          | 0.000739037 |
| 209897_s  | slit homolog 2 (Drosophila)                  | SLIT2        | 0.00475187  |
| 227827_at | CDNA clone IMAGE:4791597                     | ---          | 0.00896038  |
| 227084_at | dystrobrevin, alpha                          | DTNA         | 0.00855052  |
| 238513_at | Proline rich Gla (G-carboxyglutamic acid)    | PRRG4        | 0.000614123 |
| 244521_at | Teashirt zinc finger homeobox 2              | TSHZ2        | 3.67E-05    |
| 218009_s  | protein regulator of cytokinesis 1           | PRC1         | 0.00620085  |
| 216222_s  | myosin X                                     | MYO10        | 0.00139337  |
| 207834_at | fibulin 1                                    | FBLN1        | 0.0014234   |
| 230930_at | hypothetical protein LOC338620               | LOC338620    | 6.62E-05    |
| 202709_at | fibromodulin                                 | FMOD         | 0.0133415   |
| 206027_at | S100 calcium binding protein A3              | S100A3       | 0.00553359  |
| 212338_at | myosin ID                                    | MYO1D        | 0.0107      |
| 227475_at | forkhead box Q1                              | FOXQ1        | 0.000648833 |
| 220975_s  | C1q and tumor necrosis factor related pro    | C1QTNF1      | 0.0178947   |
| 201427_s  | selenoprotein P, plasma, 1                   | SEPP1        | 0.00218086  |
| 202859_x  | interleukin 8                                | IL8          | 0.018724    |
| 213921_at | somatostatin                                 | SST          | 0.00966379  |
| 1558034_s | ceruloplasmin (ferroxidase)                  | CP           | 0.00882818  |
| 217626_at | aldo-keto reductase family 1, member C1      | AKR1C1       | 0.00332874  |
| 209829_at | chromosome 6 open reading frame 32           | C6orf32      | 4.01E-07    |
| 208562_s  | ATP-binding cassette, sub-family C (CFTF     | ABCC9        | 0.000304999 |
| 209596_at | matrix-remodelling associated 5              | MXRA5        | 0.00318614  |
| 210664_s  | tissue factor pathway inhibitor (lipoprotein | TFPI         | 0.00153224  |
| 227606_s  | STAM binding protein-like 1                  | STAMBPL1     | 0.000858161 |
| 232925_at | CDNA FLJ13503 fis, clone PLACE100483         | ---          | 0.000456139 |
| 235244_at | coiled-coil domain containing 58             | CCDC58       | 5.18E-05    |
| 229872_s  | hypothetical protein LOC100132999            | LOC100132999 | 0.0191289   |
| 228139_at | receptor-interacting serine-threonine kinas  | RIPK3        | 1.21E-05    |
| 216250_s  | leupaxin                                     | LPXN         | 7.70E-08    |
| 205756_s  | coagulation factor VIII, procoagulant comp   | F8           | 0.000166368 |
| 202888_s  | alanyl (membrane) aminopeptidase (amin       | ANPEP        | 0.000245335 |
| 204072_s  | furry homolog (Drosophila)                   | FRY          | 0.00293426  |
| 206376_at | solute carrier family 6, member 15           | SLC6A15      | 0.0121353   |
| 223194_s  | solute carrier family 22, member 23          | SLC22A23     | 0.00116854  |
| 208729_x  | major histocompatibility complex, class I, I | HLA-B        | 0.000185637 |

|             |                                                                    |               |             |
|-------------|--------------------------------------------------------------------|---------------|-------------|
| 208609_s_;  | tenascin XB                                                        | TNXB          | 0.00288822  |
| 1554897_s_; | rhomboid, veinlet-like 2 (Drosophila)                              | RHBDL2        | 0.000156512 |
| 225511_at   | G protein-coupled receptor, family C, group 5                      | GPRC5B        | 0.00546552  |
| 209335_at   | decorin                                                            | DCN           | 0.00116829  |
| 202283_at   | serpin peptidase inhibitor, clade F (alpha-2-macroglobulin type 1) | SERPINF1      | 0.0204348   |
| 220416_at   | ATPase, class I, type 8B, member 4                                 | ATP8B4        | 0.0025938   |
| 210640_s_;  | G protein-coupled estrogen receptor 1                              | GPER          | 1.86E-06    |
| 206093_x_;  | tenascin XA pseudogene /// tenascin XB                             | TNXA /// TNXB | 0.0111367   |
| 202580_x_;  | forkhead box M1                                                    | FOXM1         | 0.0095167   |
| 225973_at   | transporter 2, ATP-binding cassette, subfamily A, member 2         | TAP2          | 0.000495803 |
| 211806_s_;  | potassium inwardly-rectifying channel, subfamily J, member 1       | KCNJ15        | 3.33E-05    |
| 203000_at   | stathmin-like 2                                                    | STMN2         | 0.00248992  |
| 209167_at   | glycoprotein M6B                                                   | GPM6B         | 4.16E-05    |
| 235272_at   | suprabasin                                                         | SBSN          | 0.00873135  |
| 211776_s_;  | erythrocyte membrane protein band 4.1-like 1                       | EPB41L3       | 0.00389709  |
| 243940_at   | teashirt zinc finger homeobox 2                                    | TSHZ2         | 0.000138491 |
| 235821_at   | CDNA FLJ14388 fis, clone HEMBA10027                                | ---           | 6.79E-05    |
| 227816_at   | netrin 1                                                           | NTN1          | 0.00650487  |
| 204678_s_;  | potassium channel, subfamily K, member 1                           | KCNK1         | 0.0103511   |
| 1556590_s_; | CDNA FLJ25645 fis, clone SYN00113                                  | ---           | 0.000475738 |
| 212070_at   | G protein-coupled receptor 56                                      | GPR56         | 0.00237343  |
| 204224_s_;  | GTP cyclohydrolase 1 (dopa-responsive decarboxylase)               | GCH1          | 0.00586338  |
| 241014_at   | hypothetical protein LOC339400                                     | LOC339400     | 0.000288146 |
| 218824_at   | PNMA-like 1                                                        | PNMAL1        | 0.00174597  |
| 209869_at   | adrenergic, alpha-2A-, receptor                                    | ADRA2A        | 0.0116941   |
| 229127_at   | junctional adhesion molecule 2                                     | JAM2          | 0.00442345  |
| 1561642_a   | Full length insert cDNA clone YN62D03                              | ---           | 2.16E-05    |
| 210058_at   | mitogen-activated protein kinase 13                                | MAPK13        | 4.92E-05    |
| 240509_s_;  | gremlin 2, cysteine knot superfamily, homolog 2                    | GREM2         | 0.00043848  |
| 220266_s_;  | Kruppel-like factor 4 (gut)                                        | KLF4          | 0.00179094  |
| 226305_at   | Ly6/neurotoxin 1                                                   | LYNX1         | 0.00344036  |
| 211343_s_;  | collagen, type XIII, alpha 1                                       | COL13A1       | 0.000179433 |
| 219747_at   | chromosome 4 open reading frame 31                                 | C4orf31       | 0.00702684  |
| 222150_s_;  | hypothetical protein LOC54103                                      | tcag7.1314    | 0.000538036 |
| 237006_at   | Transcribed locus                                                  | ---           | 0.000112165 |
| 242288_s_;  | elastin microfibril interfacer 2                                   | EMILIN2       | 0.00110237  |
| 205290_s_;  | bone morphogenetic protein 2                                       | BMP2          | 0.0263954   |
| 228850_s_;  | ---                                                                | ---           | 0.00232394  |
| 231963_at   | CDNA FLJ13937 fis, clone Y79AA100080                               | ---           | 0.000685355 |
| 223749_at   | C1q and tumor necrosis factor related protein 2                    | C1QTNF2       | 0.001957    |
| 243813_at   | CDNA FLJ31059 fis, clone HSYRA200080                               | ---           | 0.0022715   |
| 1555229_a   | complement component 1, subcomponent 1                             | C1S           | 0.00144311  |
| 210059_s_;  | mitogen-activated protein kinase 13                                | MAPK13        | 1.02E-06    |
| 201328_at   | v-ets erythroblastosis virus E26 oncogene                          | ETS2          | 0.00457381  |
| 204628_s_;  | integrin, beta 3 (platelet glycoprotein IIIa, alpha)               | ITGB3         | 0.00415196  |
| 238178_at   | Transcribed locus                                                  | ---           | 0.00326167  |
| 209619_at   | CD74 molecule, major histocompatibility complex class II           | CD74          | 0.000345006 |
| 211839_s_;  | colony stimulating factor 1 (macrophage)                           | CSF1          | 0.000331939 |
| 209277_at   | tissue factor pathway inhibitor 2                                  | TFPI2         | 6.58E-05    |
| 216841_s_;  | superoxide dismutase 2, mitochondrial                              | SOD2          | 0.00678525  |
| 205476_at   | chemokine (C-C motif) ligand 20                                    | CCL20         | 0.0012139   |
| 238623_at   | CDNA FLJ37310 fis, clone BRAMY201670                               | ---           | 0.000115976 |
| 240556_at   | Decorin                                                            | DCN           | 0.000513922 |

|            |                                                  |             |             |
|------------|--------------------------------------------------|-------------|-------------|
| 205016_at  | transforming growth factor, alpha                | TGFA        | 4.11E-05    |
| 202566_s_  | ;supervillin                                     | SVIL        | 0.00787531  |
| 227072_at  | rotatin                                          | RTTN        | 6.48E-05    |
| 235616_at  | teashirt zinc finger homeobox 2                  | TSHZ2       | 0.000340263 |
| 1557919_a  | Hypothetical protein LOC100128757                | LOC648236   | 0.00178137  |
| 202897_at  | signal-regulatory protein alpha                  | SIRPA       | 0.00105922  |
| 219064_at  | inter-alpha (globulin) inhibitor H5              | ITIH5       | 0.00200283  |
| 229490_s_  | ;Transcribed locus                               | ---         | 0.00582016  |
| 209278_s_  | ;tissue factor pathway inhibitor 2               | TFPI2       | 2.38E-06    |
| 216598_s_  | ;chemokine (C-C motif) ligand 2                  | CCL2        | 0.0106541   |
| 207835_at  | fibulin 1                                        | FBLN1       | 0.000986635 |
| 242715_at  | Transcribed locus                                | ---         | 0.00562954  |
| 223645_s_  | ;chromosome Y open reading frame 15B             | CYorf15B    | 7.41E-06    |
| 209170_s_  | ;glycoprotein M6B                                | GPM6B       | 6.73E-06    |
| 209732_at  | C-type lectin domain family 2, member B          | CLEC2B      | 0.000221107 |
| 217504_at  | ATP-binding cassette, sub-family A (ABC1         | ABCA6       | 0.00401691  |
| 204041_at  | monoamine oxidase B                              | MAOB        | 0.00351889  |
| 235705_at  | Transcribed locus                                | ---         | 0.000288192 |
| 205730_s_  | ;actin binding LIM protein family, member 3      | ABLIM3      | 9.16E-05    |
| 224435_at  | chromosome 10 open reading frame 58              | C10orf58    | 0.00540239  |
| 216333_x_  | ;tenascin XA pseudogene /// tenascin XB          | TNXA /// TN | 0.00698274  |
| 208561_at  | ATP-binding cassette, sub-family C (CFTF         | ABCC9       | 0.000106611 |
| 222730_s_  | ;zinc finger, DHHC-type containing 2             | ZDHHC2      | 3.91E-05    |
| 232584_at  | CDNA FLJ12328 fis, clone MAMMA10021              | ---         | 7.19E-05    |
| 211829_s_  | ;G protein-coupled estrogen receptor 1           | GPER        | 0.0013038   |
| 233771_at  | CDNA FLJ13489 fis, clone PLACE100393             | ---         | 9.23E-05    |
| 210229_s_  | ;colony stimulating factor 2 (granulocyte-m      | CSF2        | 0.000217222 |
| 218559_s_  | ;v-maf musculoaponeurotic fibrosarcoma o         | MAFB        | 0.0297622   |
| 220898_at  | ---                                              | ---         | 0.000567881 |
| 204625_s_  | ;integrin, beta 3 (platelet glycoprotein IIIa, ; | ITGB3       | 0.000449763 |
| 218543_s_  | ;poly (ADP-ribose) polymerase family, men        | PARP12      | 0.00157191  |
| 232746_at  | Chemokine (C-X-C motif) receptor 7               | CXCR7       | 0.0034906   |
| 202687_s_  | ;tumor necrosis factor (ligand) superfamily,     | TNFSF10     | 0.00100878  |
| 206315_at  | cytokine receptor-like factor 1                  | CRLF1       | 2.03E-05    |
| 213451_x_  | ;tenascin XA pseudogene /// tenascin XB          | TNXA /// TN | 0.00828914  |
| 207977_s_  | ;dermatopontin                                   | DPT         | 0.017822    |
| 232617_at  | cathepsin S                                      | CTSS        | 0.00286672  |
| 229377_at  | growth hormone regulated TBC protein 1           | G RTP1      | 0.000304086 |
| 204033_at  | thyroid hormone receptor interactor 13           | TRIP13      | 0.00240766  |
| 1552502_s_ | ;rhomboid, veinlet-like 2 (Drosophila)           | RHBDL2      | 0.000223712 |
| 206404_at  | fibroblast growth factor 9 (glia-activating fa   | FGF9        | 0.0424026   |
| 204679_at  | potassium channel, subfamily K, member           | KCNK1       | 0.00405449  |
| 219454_at  | EGF-like-domain, multiple 6                      | EGFL6       | 0.00310029  |
| 204846_at  | ceruloplasmin (ferroxidase)                      | CP          | 0.00719089  |
| 242417_at  | hypothetical protein LOC283278                   | LOC283278   | 0.00243701  |
| 228728_at  | chromosome 7 open reading frame 58               | C7orf58     | 0.000164583 |
| 213929_at  | CDNA clone IMAGE:4733238                         | ---         | 0.00510193  |
| 206100_at  | carboxypeptidase M                               | CPM         | 0.00194873  |
| 215223_s_  | ;superoxide dismutase 2, mitochondrial           | SOD2        | 0.0240192   |
| 205225_at  | estrogen receptor 1                              | ESR1        | 6.75E-06    |
| 228772_at  | histamine N-methyltransferase                    | HNMT        | 0.000992596 |
| 203887_s_  | ;thrombomodulin                                  | THBD        | 0.00160071  |
| 205552_s_  | ;2',5'-oligoadenylate synthetase 1, 40/46kE      | OAS1        | 0.0132837   |



|           |                                                |           |             |
|-----------|------------------------------------------------|-----------|-------------|
| 222816_s_ | zinc finger, CCHC domain containing 2          | ZCCHC2    | 2.52E-05    |
| 202643_s_ | tumor necrosis factor, alpha-induced prote     | TNFAIP3   | 0.00128364  |
| 204429_s_ | solute carrier family 2 (facilitated glucose/t | SLC2A5    | 2.31E-05    |
| 221541_at | cysteine-rich secretory protein LCCL dom       | CRISPLD2  | 0.000711641 |
| 219684_at | receptor (chemosensory) transporter prote      | RTP4      | 0.00111387  |
| 206837_at | ALX homeobox 1                                 | ALX1      | 0.00188531  |
| 207082_at | colony stimulating factor 1 (macrophage)       | CSF1      | 0.000385938 |
| 233822_x_ | uncharacterized gastric protein YC12P          | LOC57400  | 0.00404897  |
| 220030_at | serine/threonine/tyrosine kinase 1             | STYK1     | 0.000246774 |
| 206701_x_ | endothelin receptor type B                     | EDNRB     | 0.000371155 |
| 212096_s_ | mitochondrial tumor suppressor 1               | MTUS1     | 0.000296155 |
| 203666_at | chemokine (C-X-C motif) ligand 12 (strom       | CXCL12    | 0.000130587 |
| 205082_s_ | aldehyde oxidase 1                             | AOX1      | 0.000342018 |
| 214807_at | MRNA; cDNA DKFZp564O0862 (from clon            | ---       | 0.000769981 |
| 232636_at | SLIT and NTRK-like family, member 4            | SLITRK4   | 0.0160102   |
| 227654_at | chromosome 20 open reading frame 175           | C20orf175 | 0.000675947 |
| 204415_at | interferon, alpha-inducible protein 6          | IFI6      | 0.00142751  |
| 206710_s_ | erythrocyte membrane protein band 4.1-li       | EPB41L3   | 0.000311225 |
| 204681_s_ | Rap guanine nucleotide exchange factor (       | RAPGEF5   | 0.0115947   |
| 206987_x_ | fibroblast growth factor 18                    | FGF18     | 0.0308301   |
| 211732_x_ | histamine N-methyltransferase                  | HNMT      | 0.000700562 |
| 232541_at | CDNA FLJ20099 fis, clone COL04544              | ---       | 0.000315551 |
| 205083_at | aldehyde oxidase 1                             | AOX1      | 0.000496723 |
| 218510_x_ | family with sequence similarity 134, mem       | FAM134B   | 0.000425191 |
| 205207_at | interleukin 6 (interferon, beta 2)             | IL6       | 0.00365583  |
| 233314_at | phosphatase and tensin homolog (mutate         | PTEN      | 2.03E-06    |
| 235931_at | Transcribed locus                              | ---       | 3.11E-05    |
| 242541_at | ATP-binding cassette, sub-family A (ABC1       | ABCA9     | 0.000532679 |
| 212538_at | dedicator of cytokinesis 9                     | DOCK9     | 0.000580064 |
| 226722_at | family with sequence similarity 20, membe      | FAM20C    | 0.000241291 |
| 203185_at | Ras association (RalGDS/AF-6) domain fa        | RASSF2    | 0.000444299 |
| 204972_at | 2'-5'-oligoadenylate synthetase 2, 69/71k      | OAS2      | 0.00149122  |
| 216594_x_ | aldo-keto reductase family 1, member C1        | AKR1C1    | 0.0375871   |
| 204271_s_ | endothelin receptor type B                     | EDNRB     | 0.000597861 |
| 219213_at | junctional adhesion molecule 2                 | JAM2      | 0.00261955  |
| 235059_at | RAB12, member RAS oncogene family              | RAB12     | 2.56E-05    |
| 233002_at | KIAA1622                                       | KIAA1622  | 0.00184606  |
| 226950_at | activin A receptor type II-like 1              | ACVRL1    | 0.000166647 |
| 202565_s_ | supervillin                                    | SVIL      | 0.00915491  |
| 203001_s_ | stathmin-like 2                                | STMN2     | 0.00132611  |
| 207103_at | potassium voltage-gated channel, Shal-re       | KCND2     | 0.000852938 |
| 242605_at | Transcribed locus                              | ---       | 0.000184829 |
| 1568849_a | chromosome 21 open reading frame 135           | C21orf135 | 0.00805186  |
| 218332_at | brain expressed, X-linked 1                    | BEX1      | 0.0145337   |
| 211029_x_ | fibroblast growth factor 18                    | FGF18     | 0.0250074   |
| 227188_at | chromosome 21 open reading frame 63            | C21orf63  | 0.00589391  |
| 230472_at | iroquois homeobox 1                            | IRX1      | 1.58E-05    |
| 239461_at | UDP-N-acetyl-alpha-D-galactosamine:pol         | GALNTL2   | 0.000434892 |
| 228176_at | sphingosine-1-phosphate receptor 3             | S1PR3     | 0.00153952  |
| 237054_at | ectonucleotide pyrophosphatase/phospho         | ENPP5     | 2.06E-05    |
| 209699_x_ | aldo-keto reductase family 1, member C2        | AKR1C2    | 0.0490811   |
| 213568_at | odd-skipped related 2 (Drosophila)             | OSR2      | 0.00412763  |
| 211663_x_ | prostaglandin D2 synthase 21kDa (brain)        | PTGDS     | 0.000682314 |

|            |                                              |             |             |
|------------|----------------------------------------------|-------------|-------------|
| 205830_at  | calmegin                                     | CLGN        | 0.00048939  |
| 240397_x_s | Transcribed locus                            | ---         | 0.00110986  |
| 209613_s_s | alcohol dehydrogenase 1B (class I), beta     | ADH1B       | 0.00959505  |
| 235504_at  | gremlin 2, cysteine knot superfamily, hom    | GREM2       | 0.000126214 |
| 211506_s_s | interleukin 8                                | IL8         | 0.0246823   |
| 209716_at  | colony stimulating factor 1 (macrophage)     | CSF1        | 0.000859399 |
| 241234_at  | similar to hCG1812929                        | LOC64573    | 2.52E-05    |
| 237383_at  | Transcribed locus                            | ---         | 0.000848083 |
| 201787_at  | fibulin 1 /// similar to Fibulin 1           | FBLN1 /// L | 0.00148802  |
| 213247_at  | sushi, von Willebrand factor type A, EGF     | SVEP1       | 0.00271201  |
| 211990_at  | major histocompatibility complex, class II,  | HLA-DPA1    | 0.00142259  |
| 225728_at  | sorbin and SH3 domain containing 2           | SORBS2      | 0.000526469 |
| 228752_at  | chromosome X open reading frame 10           | CXorf10     | 7.67E-05    |
| 223044_at  | solute carrier family 40 (iron-regulated tra | SLC40A1     | 0.0125819   |
| 230746_s_s | Stanniocalcin 1                              | STC1        | 0.000360291 |
| 209994_s_s | ATP-binding cassette, sub-family B (MDR)     | ABCB1 /// A | 0.000609726 |
| 218999_at  | transmembrane protein 140                    | TMEM140     | 0.000844126 |
| 230130_at  | Transcribed locus                            | ---         | 0.00317374  |
| 236361_at  | UDP-N-acetyl-alpha-D-galactosamine:poly      | GALNTL2     | 0.000789789 |
| 1558803_a  | CDNA FLJ41560 fis, clone CTONG10000          | ---         | 0.000244197 |
| 228116_at  | Clone IMAGE:120162 mRNA sequence             | ---         | 0.0123607   |
| 204148_s_s | zona pellucida glycoprotein 3 (sperm rece    | POMZP3 //   | 0.000283554 |
| 202510_s_s | tumor necrosis factor, alpha-induced prote   | TNFAIP2     | 0.00344367  |
| 205114_s_s | chemokine (C-C motif) ligand 3 /// chemok    | CCL3 /// CC | 0.00940884  |
| 228790_at  | family with sequence similarity 110, memb    | FAM110B     | 0.00417409  |
| 219869_s_s | solute carrier family 39 (zinc transporter), | SLC39A8     | 0.0215109   |
| 209598_at  | paraneoplastic antigen MA2                   | PNMA2       | 0.00168334  |
| 213068_at  | dermatopontin                                | DPT         | 0.0149978   |
| 226804_at  | family with sequence similarity 20, membe    | FAM20A      | 0.00218497  |
| 222895_s_s | B-cell CLL/lymphoma 11B (zinc finger prot    | BCL11B      | 1.84E-06    |
| 214983_at  | testis-specific transcript, Y-linked 15      | TTY15       | 4.27E-05    |
| 205794_s_s | neuro-oncological ventral antigen 1          | NOVA1       | 0.000942423 |
| 242094_at  | Full length insert cDNA clone YR40C10        | ---         | 0.000215288 |
| 228665_at  | cysteine/tyrosine-rich 1                     | CYYR1       | 0.000229309 |
| 204151_x_s | aldo-keto reductase family 1, member C1      | AKR1C1      | 0.0418847   |
| 201525_at  | apolipoprotein D                             | APOD        | 0.000393602 |
| 205896_at  | solute carrier family 22 (organic cation/erg | SLC22A4     | 1.65E-05    |
| 204994_at  | myxovirus (influenza virus) resistance 2 (n  | MX2         | 0.00287199  |
| 204161_s_s | ectonucleotide pyrophosphatase/phospho       | ENPP4       | 0.000230536 |
| 204112_s_s | histamine N-methyltransferase                | HNMT        | 0.000769256 |
| 207542_s_s | aquaporin 1 (Colton blood group)             | AQP1        | 0.00107127  |
| 210692_s_s | solute carrier family 43, member 3           | SLC43A3     | 0.000608964 |
| 203407_at  | periplakin                                   | PPL         | 0.00952139  |
| 234931_at  | AYP1 pseudogene 1                            | AYP1p1      | 4.80E-06    |
| 207819_s_s | ATP-binding cassette, sub-family B (MDR)     | ABCB4       | 0.00227175  |
| 228302_x_s | calcium/calmodulin-dependent protein kin     | CAMK2N1     | 0.0040713   |
| 220794_at  | gremlin 2, cysteine knot superfamily, hom    | GREM2       | 0.000162832 |
| 202411_at  | interferon, alpha-inducible protein 27       | IFI27       | 0.00146127  |
| 228635_at  | protocadherin 10                             | PCDH10      | 0.00271245  |
| 205828_at  | matrix metalloproteinase 3 (stromelysin 1,   | MMP3        | 0.00109077  |
| 204470_at  | chemokine (C-X-C motif) ligand 1 (melanc     | CXCL1       | 0.0213632   |
| 219352_at  | hect domain and RLD 6                        | HERC6       | 0.00418941  |
| 213620_s_s | intercellular adhesion molecule 2            | ICAM2       | 0.000637834 |

|           |                                                              |              |             |
|-----------|--------------------------------------------------------------|--------------|-------------|
| 224397_s_ | transmembrane and tetratricopeptide repeat                   | TMTC1        | 0.00139684  |
| 230760_at | zinc finger protein, Y-linked /// hypothetical               | LOC100130    | 8.26E-05    |
| 204288_s_ | sorbin and SH3 domain containing 2                           | SORBS2       | 0.00163624  |
| 214265_at | integrin, alpha 8                                            | ITGA8        | 1.30E-05    |
| 210910_s_ | POM (POM121 homolog, rat) and ZP3 fusion                     | POMZP3       | 1.14E-05    |
| 212224_at | aldehyde dehydrogenase 1 family, member 1                    | ALDH1A1      | 0.00390394  |
| 223703_at | chromosome 10 open reading frame 11                          | C10orf11     | 8.22E-06    |
| 210145_at | phospholipase A2, group IVA (cytosolic, calcium dependent)   | PLA2G4A      | 0.00226044  |
| 220032_at | chromosome 7 open reading frame 58                           | C7orf58      | 2.82E-05    |
| 202902_s_ | cathepsin S                                                  | CTSS         | 0.0119945   |
| 231382_at | Fibroblast growth factor 18                                  | FGF18        | 0.0242361   |
| 209546_s_ | apolipoprotein L, 1                                          | APOL1        | 3.98E-05    |
| 236694_at | chromosome Y open reading frame 15A                          | CYorf15A     | 3.94E-06    |
| 203632_s_ | G protein-coupled receptor, family C, group 5B               | GPRC5B       | 0.00202759  |
| 209612_s_ | alcohol dehydrogenase 1B (class I), beta 1                   | ADH1B        | 0.0226839   |
| 209267_s_ | solute carrier family 39 (zinc transporter), member 8        | SLC39A8      | 0.0200252   |
| 234623_x_ | Metastasis related protein (MB2)                             | ---          | 0.0355407   |
| 204389_at | monoamine oxidase A                                          | MAOA         | 3.72E-05    |
| 218532_s_ | family with sequence similarity 134, member 1                | FAM134B      | 0.000662016 |
| 229657_at | thyroid hormone receptor, beta (erythroblastic)              | THRB         | 0.0138931   |
| 221885_at | DENN/MADD domain containing 2A                               | DENND2A      | 4.47E-05    |
| 225871_at | six transmembrane epithelial antigen of the stomach 2        | STEAP2       | 9.77E-05    |
| 219825_at | cytochrome P450, family 26, subfamily B, member 1            | CYP26B1      | 0.000417031 |
| 213113_s_ | solute carrier family 43, member 3                           | SLC43A3      | 0.000621658 |
| 211596_s_ | leucine-rich repeats and immunoglobulin-like domains 1       | LRIG1        | 0.00148583  |
| 213797_at | radical S-adenosyl methionine domain containing 2            | RSAD2        | 0.0368657   |
| 213385_at | chimerin (chimaerin) 2                                       | CHN2         | 0.000696121 |
| 227835_at | Hypothetical protein LOC100132181                            | LOC100132181 | 7.06E-05    |
| 204279_at | proteasome (prosome, macropain) subunit type 9               | PSMB9        | 0.00133423  |
| 235666_at | Transcribed locus                                            | ---          | 3.09E-05    |
| 202688_at | tumor necrosis factor (ligand) superfamily, member 10        | TNFSF10      | 0.00011889  |
| 211748_x_ | prostaglandin D2 synthase 21kDa (brain)                      | PTGDS        | 0.000827568 |
| 217220_at | ---                                                          | ---          | 4.83E-05    |
| 232668_at | CDNA FLJ11528 fis, clone HEMBA100262                         | ---          | 0.000241004 |
| 219908_at | dickkopf homolog 2 (Xenopus laevis)                          | DKK2         | 0.0133039   |
| 221959_at | family with sequence similarity 110, member 1                | FAM110B      | 0.0014445   |
| 235044_at | cysteine/tyrosine-rich 1                                     | CYYR1        | 7.55E-05    |
| 217767_at | complement component 3                                       | C3           | 0.00600744  |
| 53991_at  | DENN/MADD domain containing 2A                               | DENND2A      | 7.03E-07    |
| 226632_at | cytoglobin                                                   | CYGB         | 0.00286822  |
| 227526_at | Cdon homolog (mouse)                                         | CDON         | 0.00604267  |
| 202409_at | insulin-like growth factor 2 (somatomedin) B                 | IGF2         | 0.0367546   |
| 1559254_a | chromosome 21 open reading frame 113                         | C21orf113    | 0.00250681  |
| 204410_at | eukaryotic translation initiation factor 1A, nuclear         | EIF1AY       | 0.000126144 |
| 242625_at | radical S-adenosyl methionine domain containing 2            | RSAD2        | 0.0175426   |
| 205001_s_ | DEAD (Asp-Glu-Ala-Asp) box polypeptide DDX3Y /// LOC100130   | DDX3Y        | 4.34E-06    |
| 218885_s_ | UDP-N-acetyl-alpha-D-galactosamine:polyphosphate 4-epimerase | GALNT12      | 0.000615301 |
| 206026_s_ | tumor necrosis factor, alpha-induced protein 6               | TNFAIP6      | 0.0204457   |
| 243115_at | Transcribed locus                                            | ---          | 0.000554233 |
| 219552_at | sushi, von Willebrand factor type A, EGF repeats             | SVEP1        | 0.000130366 |
| 210119_at | potassium inwardly-rectifying channel, subunit 15            | KCNJ15       | 1.73E-06    |
| 204501_at | nephroblastoma overexpressed gene                            | NOV          | 0.00172217  |
| 213415_at | chloride intracellular channel 2                             | CLIC2        | 0.000383294 |

|             |                                                                       |           |             |
|-------------|-----------------------------------------------------------------------|-----------|-------------|
| 217553_at   | similar to Six transmembrane epithelial an MGC87042                   |           | 2.76E-06    |
| 226702_at   | cytidine monophosphate (UMP-CMP) kinase                               | CMPK2     | 0.00196967  |
| 228716_at   | thyroid hormone receptor, beta (erythroblasts)                        | THRB      | 0.0238919   |
| 224414_s_c  | caspase recruitment domain family, member                             | CARD6     | 4.22E-07    |
| 234104_at   | CDNA FLJ10198 fis, clone HEMBA10048                                   | ---       | 8.07E-05    |
| 207703_at   | neuroigin 4, Y-linked                                                 | NLGN4Y    | 3.02E-05    |
| 206134_at   | ADAM-like, decysin 1                                                  | ADAMDEC   | 0.000451843 |
| 202086_at   | myxovirus (influenza virus) resistance 1, influenza                   | MX1       | 0.00249716  |
| 204430_s_c  | solute carrier family 2 (facilitated glucose transporters)            | SLC2A5    | 0.00015674  |
| 213036_x_c  | ATPase, Ca++ transporting, ubiquitous                                 | ATP2A3    | 8.93E-05    |
| 228501_at   | UDP-N-acetyl-alpha-D-galactosamine:polyacetylmuricic acid 4-epimerase | GALNTL2   | 0.000285685 |
| 204719_at   | ATP-binding cassette, sub-family A (ABC transporters)                 | ABCA8     | 0.000117285 |
| 212187_x_c  | prostaglandin D2 synthase 21kDa (brain)                               | PTGDS     | 0.00140484  |
| 221916_at   | neurofilament, light polypeptide 68kDa                                | NEFL      | 0.000113664 |
| 203828_s_c  | interleukin 32                                                        | IL32      | 0.00835039  |
| 212670_at   | elastin (supravalvular aortic stenosis, Williams)                     | ELN       | 0.00645962  |
| 207375_s_c  | interleukin 15 receptor, alpha                                        | IL15RA    | 0.000398392 |
| 229802_at   | CDNA FLJ14388 fis, clone HEMBA10027                                   | ---       | 5.48E-05    |
| 210538_s_c  | baculoviral IAP repeat-containing 3                                   | BIRC3     | 0.00246491  |
| 217546_at   | metallothionein 1M                                                    | MT1M      | 0.000652994 |
| 202718_at   | insulin-like growth factor binding protein 2                          | IGFBP2    | 0.00106489  |
| 202286_s_c  | tumor-associated calcium signal transducer                            | TACSTD2   | 0.0067088   |
| 221019_s_c  | collectin sub-family member 12                                        | COLEC12   | 0.00214998  |
| 238455_at   | CDNA FLJ45742 fis, clone KIDNE201632                                  | ---       | 0.000319492 |
| 206025_s_c  | tumor necrosis factor, alpha-induced protein 3                        | TNFAIP6   | 0.0197163   |
| 205413_at   | metallophosphoesterase domain containing                              | MPPED2    | 0.00272346  |
| 209392_at   | ectonucleotide pyrophosphatase/phosphodiesterase 2                    | ENPP2     | 0.000467628 |
| 225016_at   | adenomatous polyposis coli down-regulated 1                           | APCDD1    | 0.00951759  |
| 1555623_a_c | ---                                                                   | ---       | 0.017568    |
| 224354_at   | ---                                                                   | ---       | 0.0153011   |
| 202037_s_c  | secreted frizzled-related protein 1                                   | SFRP1     | 0.000273313 |
| 204597_x_c  | stanniocalcin 1                                                       | STC1      | 0.000121422 |
| 227742_at   | chloride intracellular channel 6                                      | CLIC6     | 0.0105607   |
| 222773_s_c  | UDP-N-acetyl-alpha-D-galactosamine:polyacetylmuricic acid 4-epimerase | GALNT12   | 0.00063296  |
| 1554163_a_c | twist homolog 2 (Drosophila)                                          | TWIST2    | 1.65E-05    |
| 205226_at   | platelet-derived growth factor receptor-like 1                        | PDGFR1    | 0.00570656  |
| 204595_s_c  | stanniocalcin 1                                                       | STC1      | 0.000141915 |
| 204879_at   | podoplanin                                                            | PDPN      | 2.64E-05    |
| 236297_at   | CDNA FLJ45742 fis, clone KIDNE201632                                  | ---       | 9.41E-05    |
| 209496_at   | retinoic acid receptor responder (tazarotene)                         | RARRES2   | 0.00128032  |
| 223235_s_c  | SPARC related modular calcium binding 2                               | SMOC2     | 0.00498447  |
| 206700_s_c  | jumonji, AT rich interactive domain 1D                                | JARID1D   | 1.92E-06    |
| 204388_s_c  | monoamine oxidase A                                                   | MAOA      | 0.000174782 |
| 209047_at   | aquaporin 1 (Colton blood group)                                      | AQP1      | 0.000135943 |
| 226926_at   | dermokine                                                             | DMKN      | 0.000794276 |
| 206624_at   | ubiquitin specific peptidase 9, Y-linked (fat)                        | LOC100130 | 2.90E-05    |
| 226658_at   | podoplanin                                                            | PDPN      | 3.44E-05    |
| 202036_s_c  | secreted frizzled-related protein 1                                   | SFRP1     | 0.000583108 |
| 220351_at   | chemokine (C-C motif) receptor-like 1                                 | CCRL1     | 0.0101668   |
| 207522_s_c  | ATPase, Ca++ transporting, ubiquitous                                 | ATP2A3    | 0.000190227 |
| 212741_at   | monoamine oxidase A                                                   | MAOA      | 8.42E-05    |
| 207386_at   | cytochrome P450, family 7, subfamily B, polypeptide                   | CYP7B1    | 0.000258473 |
| 235438_at   | Transcribed locus                                                     | ---       | 0.00194471  |

|           |                                                 |           |             |
|-----------|-------------------------------------------------|-----------|-------------|
| 206172_at | interleukin 13 receptor, alpha 2                | IL13RA2   | 0.000298089 |
| 226322_at | transmembrane and tetratricopeptide repeat      | TMTC1     | 0.0010184   |
| 205713_s_ | cartilage oligomeric matrix protein             | COMP      | 0.00351414  |
| 228450_at | pleckstrin homology domain containing, family 7 | PLEKHA7   | 0.00109978  |
| 228492_at | ubiquitin specific peptidase 9, Y-linked (fat   | LOC100130 | 4.65E-05    |
| 205870_at | bradykinin receptor B2                          | BDKRB2    | 0.000290368 |
| 214321_at | nephroblastoma overexpressed gene               | NOV       | 0.00107567  |
| 204638_at | acid phosphatase 5, tartrate resistant          | ACP5      | 4.31E-06    |
| 203180_at | aldehyde dehydrogenase 1 family, member 3       | ALDH1A3   | 4.92E-05    |
| 226865_at | MRNA; cDNA DKFZp564O0862 (from clone            | ---       | 6.39E-05    |
| 200986_at | serpin peptidase inhibitor, clade G (C1 inh     | SERPING1  | 7.85E-05    |
| 205113_at | neurofilament, medium polypeptide 150kDa        | NEFM      | 0.000366269 |
| 223121_s_ | secreted frizzled-related protein 2             | SFRP2     | 0.00905972  |
| 209616_s_ | carboxylesterase 1 (monocyte/macrophage         | CES1      | 1.06E-05    |
| 213817_at | CDNA FLJ13601 fis, clone PLACE101006            | ---       | 5.76E-05    |
| 204596_s_ | stanniocalcin 1                                 | STC1      | 4.10E-05    |
| 223710_at | chemokine (C-C motif) ligand 26                 | CCL26     | 2.80E-05    |
| 207761_s_ | methyltransferase like 7A                       | METTL7A   | 0.00238616  |
| 205818_at | deleted in bladder cancer 1                     | DBC1      | 0.00111464  |
| 204160_s_ | ectonucleotide pyrophosphatase/phospho          | ENPP4     | 5.82E-05    |
| 212977_at | chemokine (C-X-C motif) receptor 7              | CXCR7     | 0.00162213  |
| 204627_s_ | integrin, beta 3 (platelet glycoprotein IIIa,   | ITGB3     | 0.000170621 |
| 223122_s_ | secreted frizzled-related protein 2             | SFRP2     | 0.0071308   |
| 209160_at | aldo-keto reductase family 1, member C3         | AKR1C3    | 0.0155996   |
| 228057_at | DNA-damage-inducible transcript 4-like          | DDIT4L    | 0.000996522 |
| 202291_s_ | matrix Gla protein                              | MGP       | 0.000378866 |
| 210839_s_ | ectonucleotide pyrophosphatase/phospho          | ENPP2     | 0.00140031  |
| 231804_at | relaxin/insulin-like family peptide receptor    | RXFP1     | 0.000338159 |
| 218345_at | transmembrane protein 176A                      | TMEM176A  | 0.000121887 |
| 204932_at | tumor necrosis factor receptor superfamily      | TNFRSF11  | 0.0040407   |
| 228186_s_ | R-spondin 3 homolog (Xenopus laevis)            | RSPO3     | 0.00257038  |
| 238206_at | relaxin/insulin-like family peptide receptor    | RXFP1     | 0.000719292 |
| 202035_s_ | secreted frizzled-related protein 1             | SFRP1     | 0.000302411 |
| 211892_s_ | prostaglandin I2 (prostacyclin) synthase        | PTGIS     | 1.52E-06    |
| 227803_at | ectonucleotide pyrophosphatase/phospho          | ENPP5     | 2.62E-05    |
| 227058_at | chromosome 13 open reading frame 33             | C13orf33  | 3.29E-06    |
| 205382_s_ | complement factor D (adipsin)                   | CFD       | 3.12E-05    |
| 221898_at | podoplanin                                      | PDPN      | 0.000105372 |
| 202357_s_ | complement factor B                             | CFB       | 0.00352611  |
| 206030_at | aspartoacylase (Canavan disease)                | ASPA      | 1.20E-05    |
| 1552715_a | relaxin/insulin-like family peptide receptor    | RXFP1     | 0.000749799 |
| 226931_at | transmembrane and tetratricopeptide repeat      | TMTC1     | 6.28E-05    |
| 210702_s_ | prostaglandin I2 (prostacyclin) synthase        | PTGIS     | 1.64E-05    |
| 204409_s_ | eukaryotic translation initiation factor 1A,    | EIF1AY    | 2.47E-06    |
| 221805_at | neurofilament, light polypeptide 68kDa          | NEFL      | 0.000299767 |
| 227276_at | plexin domain containing 2                      | PLXDC2    | 5.88E-05    |
| 205000_at | DEAD (Asp-Glu-Ala-Asp) box polypeptide          | DDX3Y     | 1.29E-07    |
| 220532_s_ | transmembrane protein 176B                      | TMEM176E  | 8.33E-06    |
| 205110_s_ | fibroblast growth factor 13                     | FGF13     | 1.29E-05    |
| 205549_at | Purkinje cell protein 4                         | PCP4      | 0.00823663  |
| 204933_s_ | tumor necrosis factor receptor superfamily      | TNFRSF11  | 0.0060495   |
| 218723_s_ | chromosome 13 open reading frame 15             | C13orf15  | 6.17E-05    |
| 205792_at | WNT1 inducible signaling pathway protein        | WISP2     | 1.71E-05    |

|                                                       |           |             |
|-------------------------------------------------------|-----------|-------------|
| 207092_at leptin                                      | LEP       | 0.000180351 |
| 208131_s_1 prostaglandin I2 (prostacyclin) synthase   | PTGIS     | 0.000147476 |
| 201909_at ribosomal protein S4, Y-linked 1 /// hypoth | LOC100133 | 1.40E-07    |
| 232267_at G protein-coupled receptor 133              | GPR133    | 4.32E-05    |

GFoldChange(P vs. WT)

-97.6301  
-76.7778  
-52.0316  
-49.3123  
-33.4092  
-32.4634  
-30.0986  
-27.0331  
-26.2977  
-26.1075  
-25.5515  
-23.8487  
-20.6308  
-19.363  
-18.5015  
-17.3106  
-17.3052  
-17.2288  
-16.9751  
-15.4589  
-14.9092  
-14.357  
-12.8949  
-12.7567  
-12.1845  
-12.1189  
-12.0783  
-11.9868  
-11.6043  
-11.2672  
-10.9034  
-10.8885  
-10.808  
-10.5192  
-10.4347  
-9.7462  
-9.73142  
-9.40667  
-9.3468  
-9.16158  
-8.94902  
-8.82056  
-8.76374  
-8.61752  
-8.59412  
-8.09922  
-8.07048  
-8.00729  
-7.72299  
-7.53435  
-7.50638  
-7.4891

-7.367  
-7.30014  
-7.07905  
-7.06734  
-7.01876  
-6.96231  
-6.78725  
-6.76325  
-6.74479  
-6.72549  
-6.61784  
-6.60501  
-6.59663  
-6.58865  
-6.55196  
-6.45115  
-6.39002  
-6.38246  
-6.35153  
-6.18534  
-6.16591  
-6.15331  
-6.04334  
-6.00598  
-5.99515  
-5.92995  
-5.92067  
-5.87727  
-5.86494  
-5.7988  
-5.79194  
-5.73459  
-5.71627  
-5.63572  
-5.62639  
-5.62232  
-5.47135  
-5.44718  
-5.43349  
-5.41212  
-5.40386  
-5.3973  
-5.39685  
-5.3907  
-5.3414  
-5.30042  
-5.2985  
-5.29094  
-5.28419  
-5.23386  
-5.21602  
-5.11913  
-5.10637



-5.09234  
-5.06831  
-5.06041  
-5.05995  
-5.00591  
-4.99884  
-4.97578  
-4.89463  
-4.88331  
-4.82814  
-4.81033  
-4.73745  
-4.70469  
-4.67949  
-4.66069  
-4.6586  
-4.64014  
-4.638  
-4.63577  
-4.63225  
-4.62888  
-4.62432  
-4.62073  
-4.60912  
-4.58796  
-4.56292  
-4.52397  
-4.51013  
-4.48691  
-4.47164  
-4.47125  
-4.42284  
-4.41965  
-4.40754  
-4.3875  
-4.38085  
-4.37967  
-4.36652  
-4.36596  
-4.36295  
-4.35772  
-4.34522  
-4.33606  
-4.33394  
-4.32044  
-4.29669  
-4.28881  
-4.27737  
-4.21928  
-4.21088  
-4.20687  
-4.19654  
-4.18095

-4.14556  
-4.14525  
-4.1137  
-4.10338  
-4.10267  
-4.10014  
-4.09703  
-4.07442  
-4.0732  
-4.05524  
-4.03789  
-4.03146  
-4.00773  
-3.96703  
-3.94989  
-3.94422  
-3.91674  
-3.90658  
-3.89728  
-3.88664  
-3.84714  
-3.81275  
-3.79966  
-3.79813  
-3.79611  
-3.79298  
-3.76533  
-3.76001  
-3.75454  
-3.75181  
-3.74517  
-3.73402  
-3.72821  
-3.71386  
-3.68991  
-3.68163  
-3.68039  
-3.67955  
-3.67659  
-3.67191  
-3.66689  
-3.65853  
-3.65128  
-3.64627  
-3.6443  
-3.63017  
-3.5849  
-3.56935  
-3.56352  
-3.56296  
-3.55588  
-3.55504  
-3.55346

-3.54251  
-3.53798  
-3.53546  
-3.52497  
-3.51532  
-3.50502  
-3.49751  
-3.48061  
-3.47152  
-3.45077  
-3.45034  
-3.44275  
-3.43976  
-3.42518  
-3.41931  
-3.40926  
-3.40723  
-3.40665  
-3.37472  
-3.36067  
-3.33329  
-3.2915  
-3.28807  
-3.27041  
-3.2651  
-3.25921  
-3.2563  
-3.25615  
-3.24975  
-3.24422  
-3.24299  
-3.23282  
-3.22615  
-3.21882  
-3.21468  
-3.21062  
-3.1812  
-3.18112  
-3.16435  
-3.15641  
-3.14611  
-3.1452  
-3.1442  
-3.14083  
-3.13927  
-3.13837  
-3.13644  
-3.10879  
-3.10687  
-3.09947  
-3.09768  
-3.09069  
-3.08598

-3.08196  
-3.08117  
-3.07622  
-3.07519  
-3.07301  
-3.07111  
-3.06956  
-3.06622  
-3.04318  
-3.03614  
-3.03364  
-3.02402  
-3.0212  
-3.02076  
-3.01842  
-3.01749  
-3.01049  
-2.99594  
-2.9932  
-2.99  
-2.97819  
-2.97788  
-2.967  
-2.96632  
-2.96134  
-2.95966  
-2.94486  
-2.94224  
-2.94125  
-2.92582  
-2.91929  
-2.91006  
-2.90816  
-2.90363  
-2.90306  
-2.90103  
-2.89725  
-2.89303  
-2.89098  
-2.88632  
-2.8833  
-2.87474  
-2.86644  
-2.86555  
-2.86078  
-2.85676  
-2.83452  
-2.83145  
-2.83079  
-2.82837  
-2.82735  
-2.82723  
-2.82515

-2.82419  
-2.82368  
-2.81903  
-2.81834  
-2.81405  
-2.80872  
-2.80809  
-2.79488  
-2.79181  
-2.78823  
-2.78556  
-2.78461  
-2.78039  
-2.77532  
-2.77502  
-2.77491  
-2.7745  
-2.7724  
-2.7715  
-2.76936  
-2.76353  
-2.76004  
-2.75369  
-2.74817  
-2.74562  
-2.73955  
-2.73087  
-2.72774  
-2.72382  
-2.72252  
-2.718  
-2.71649  
-2.71426  
-2.71111  
-2.70871  
-2.70433  
-2.6998  
-2.68927  
-2.68477  
-2.68043  
-2.67169  
-2.66964  
-2.66728  
-2.66237  
-2.66049  
-2.65805  
-2.65607  
-2.65321  
-2.64588  
-2.6431  
-2.62801  
-2.62544  
-2.62362

-2.61925  
-2.61581  
-2.61487  
-2.61361  
-2.61356  
-2.6122  
-2.60852  
-2.60669  
-2.60578  
-2.60249  
-2.60188  
-2.59922  
-2.5991  
-2.59784  
-2.59389  
-2.58855  
-2.58741  
-2.58727  
-2.58346  
-2.58055  
-2.57585  
-2.57435  
-2.57237  
-2.56263  
-2.56028  
-2.55924  
-2.55767  
-2.55375  
-2.55069  
-2.54821  
-2.54053  
-2.53925  
-2.53661  
-2.53552  
-2.53405  
-2.53306  
-2.53198  
-2.52844  
-2.52435  
-2.51384  
-2.51312  
-2.51108  
-2.50803  
-2.50793  
-2.50539  
-2.50378  
-2.50274  
-2.5006  
-2.49761  
-2.49564  
-2.49442  
-2.49012  
-2.47524

-2.47452  
-2.47321  
-2.47301  
-2.46986  
-2.4683  
-2.46322  
-2.46038  
-2.45687  
-2.45386  
-2.45306  
-2.45297  
-2.44561  
-2.4453  
-2.4429  
-2.43574  
-2.43561  
-2.43443  
-2.4341  
-2.43297  
-2.43296  
-2.42206  
-2.41956  
-2.41813  
-2.41802  
-2.41674  
-2.4167  
-2.41604  
-2.41521  
-2.41507  
-2.41386  
-2.41375  
-2.41285  
-2.41123  
-2.41099  
-2.40792  
-2.40741  
-2.40713  
-2.40639  
-2.40467  
-2.40432  
-2.40411  
-2.4026  
-2.39702  
-2.39541  
-2.39364  
-2.39172  
-2.39096  
-2.38822  
-2.38787  
-2.38691  
-2.38506  
-2.3841  
-2.38227

-2.38085  
-2.37955  
-2.37876  
-2.37871  
-2.37806  
-2.3777  
-2.37246  
-2.37205  
-2.37008  
-2.36999  
-2.36492  
-2.36224  
-2.36216  
-2.35905  
-2.35478  
-2.35227  
-2.34823  
-2.34732  
-2.34148  
-2.33835  
-2.3379  
-2.33609  
-2.33566  
-2.33229  
-2.33168  
-2.32898  
-2.32827  
-2.32746  
-2.32613  
-2.32497  
-2.32346  
-2.3232  
-2.32007  
-2.32007  
-2.3158  
-2.31215  
-2.30873  
-2.30605  
-2.30112  
-2.29831  
-2.29745  
-2.29729  
-2.29699  
-2.29665  
-2.29569  
-2.29281  
-2.29155  
-2.29039  
-2.28785  
-2.2837  
-2.28191  
-2.27891  
-2.27679



-2.2749  
-2.27304  
-2.27282  
-2.27208  
-2.27051  
-2.2702  
-2.26993  
-2.26754  
-2.26679  
-2.26509  
-2.2645  
-2.26098  
-2.25406  
-2.25376  
-2.25376  
-2.25245  
-2.25203  
-2.24774  
-2.24699  
-2.24613  
-2.24474  
-2.24428  
-2.24263  
-2.24249  
-2.24232  
-2.24119  
-2.24065  
-2.23506  
-2.2343  
-2.23284  
-2.23184  
-2.22911  
-2.22894  
-2.22826  
-2.2262  
-2.22335  
-2.22212  
-2.22101  
-2.22021  
-2.21631  
-2.21607  
-2.21542  
-2.21476  
-2.21329  
-2.21054  
-2.20913  
-2.20612  
-2.20592  
-2.2056  
-2.20471  
-2.20397  
-2.20237  
-2.20129

-2.20025  
-2.20008  
-2.19604  
-2.19401  
-2.19272  
-2.1922  
-2.19153  
-2.1898  
-2.1895  
-2.18901  
-2.18698  
-2.18624  
-2.18463  
-2.18457  
-2.18307  
-2.18216  
-2.18154  
-2.17799  
-2.17751  
-2.1775  
-2.17748  
-2.17629  
-2.17387  
-2.17318  
-2.1723  
-2.17131  
-2.16944  
-2.16774  
-2.1658  
-2.16572  
-2.16548  
-2.16528  
-2.16476  
-2.16354  
-2.16262  
-2.16022  
-2.16011  
-2.15983  
-2.15887  
-2.15715  
-2.15661  
-2.15627  
-2.1558  
-2.15553  
-2.15516  
-2.15469  
-2.15271  
-2.14994  
-2.14883  
-2.14716  
-2.14667  
-2.14652  
-2.1457

-2.14431  
-2.14398  
-2.14315  
-2.14124  
-2.14012  
-2.13921  
-2.1362  
-2.13592  
-2.13493  
-2.13081  
-2.12891  
-2.128  
-2.12757  
-2.12731  
-2.12661  
-2.12534  
-2.12454  
-2.12447  
-2.12257  
-2.11611  
-2.11514  
-2.11413  
-2.1117  
-2.11166  
-2.11084  
-2.11013  
-2.11011  
-2.11  
-2.10971  
-2.10777  
-2.10665  
-2.10434  
-2.10387  
-2.10192  
-2.10136  
-2.10096  
-2.10021  
-2.09548  
-2.09536  
-2.09531  
-2.09531  
-2.0947  
-2.09252  
-2.09241  
-2.09152  
-2.08989  
-2.08989  
-2.08974  
-2.08842  
-2.08775  
-2.08362  
-2.083  
-2.08023

-2.07928  
-2.07641  
-2.0764  
-2.07567  
-2.06963  
-2.06931  
-2.06923  
-2.06904  
-2.06899  
-2.06891  
-2.06667  
-2.06595  
-2.06508  
-2.06495  
-2.06466  
-2.06456  
-2.06279  
-2.06264  
-2.06151  
-2.06001  
-2.05701  
-2.05649  
-2.05476  
-2.05383  
-2.05205  
-2.04905  
-2.04782  
-2.04697  
-2.04505  
-2.04499  
-2.04477  
-2.04455  
-2.04422  
-2.04003  
-2.03953  
-2.03784  
-2.03749  
-2.03604  
-2.03525  
-2.03462  
-2.03297  
-2.03101  
-2.03059  
-2.03015  
-2.0296  
-2.02942  
-2.02885  
-2.02755  
-2.02498  
-2.02437  
-2.02368  
-2.02296  
-2.02279

-2.02206  
-2.02182  
-2.01885  
-2.01701  
-2.01598  
-2.01541  
-2.01515  
-2.01386  
-2.01138  
-2.00841  
-2.00804  
-2.00699  
-2.00615  
-2.00553  
-2.00549  
-2.00539  
-2.00349  
-2.00341  
-2.00252  
-2.00138  
-2.00012  
-2.00002  
2.00037  
2.00058  
2.00293  
2.0032  
2.00354  
2.00367  
2.00408  
2.00464  
2.00467  
2.00534  
2.00572  
2.00588  
2.00642  
2.00787  
2.01109  
2.0129  
2.01309  
2.0131  
2.01335  
2.01391  
2.01445  
2.01499  
2.0153  
2.01541  
2.01759  
2.01885  
2.01898  
2.01989  
2.01993  
2.02122  
2.022

2.02206  
2.02209  
2.02261  
2.02265  
2.02389  
2.02467  
2.02505  
2.02527  
2.02559  
2.02574  
2.02618  
2.02633  
2.02653  
2.0266  
2.02668  
2.02711  
2.0276  
2.02811  
2.02873  
2.0289  
2.02906  
2.02932  
2.03039  
2.03104  
2.03176  
2.03416  
2.03437  
2.03439  
2.03439  
2.03472  
2.03678  
2.0378  
2.03798  
2.03799  
2.03809  
2.03846  
2.03893  
2.04108  
2.04185  
2.04363  
2.04391  
2.04415  
2.04723  
2.04802  
2.04826  
2.0486  
2.04915  
2.0497  
2.05054  
2.05112  
2.05172  
2.05177  
2.05178

2.05193  
2.05314  
  2.0536  
2.05403  
2.05404  
2.05504  
2.05512  
  2.0556  
2.05571  
2.05581  
2.05608  
2.05628  
2.05712  
2.05771  
2.05849  
  2.0585  
2.05854  
2.05866  
2.05877  
2.05901  
2.05968  
2.06153  
2.06471  
2.06475  
2.06499  
2.06545  
2.06586  
  2.0668  
  2.0671  
2.06754  
2.06954  
  2.07  
2.07092  
  2.0715  
2.07277  
2.07291  
2.07346  
2.07512  
2.07901  
2.07947  
2.07956  
2.08001  
2.08063  
2.08271  
2.08281  
2.08284  
2.08343  
2.08447  
2.08535  
2.08669  
2.08786  
  2.088  
2.08914

2.08954  
2.08954  
2.08995  
2.09019  
2.09032  
  2.0913  
2.09167  
2.09235  
2.09308  
2.09315  
2.09319  
2.09487  
2.09806  
2.09898  
2.10098  
2.10133  
2.10215  
2.10329  
2.10365  
2.10455  
2.10519  
2.10582  
2.10609  
2.10781  
  2.1081  
2.10826  
2.10932  
  2.1113  
2.11352  
2.11733  
2.11749  
2.11791  
2.11845  
2.11953  
2.12206  
  2.1253  
2.12552  
2.12597  
2.12627  
2.12682  
  2.127  
2.12712  
2.12734  
2.13057  
2.13191  
2.13208  
2.13221  
2.13292  
2.13413  
2.13492  
  2.1356  
2.13615  
2.13962



2.14024  
2.1412  
2.14257  
2.14355  
2.14408  
2.14598  
2.14681  
2.14743  
2.14795  
2.14821  
2.1483  
2.14913  
2.15004  
2.15093  
2.15223  
2.1525  
2.15283  
2.15364  
2.15392  
2.15393  
2.15474  
2.15568  
2.15613  
2.15616  
2.15641  
2.15787  
2.15818  
2.15879  
2.15893  
2.15956  
2.16013  
2.16069  
2.16082  
2.1624  
2.16602  
2.16613  
2.16725  
2.16806  
2.16844  
2.16986  
2.17017  
2.17045  
2.17094  
2.17111  
2.17111  
2.1732  
2.17329  
2.17352  
2.17404  
2.17484  
2.17503  
2.17513  
2.17519

2.17577  
2.17626  
2.17691  
2.17805  
2.17956  
2.18032  
2.18054  
2.18086  
2.18098  
2.18145  
2.18161  
2.18249  
2.18306  
2.18355  
2.18478  
2.18495  
  2.1852  
2.18685  
2.18711  
2.18761  
2.18815  
2.19031  
2.19322  
2.19448  
2.19451  
2.19586  
2.19593  
  2.196  
2.19601  
2.19637  
2.19806  
  2.1984  
2.19897  
2.19925  
2.19952  
2.20004  
2.20039  
2.20086  
2.20396  
2.20425  
2.20463  
2.20467  
2.20474  
2.20581  
2.20658  
  2.2087  
2.20891  
2.20952  
2.20991  
2.21008  
2.21009  
  2.2106  
2.21161

2.21185  
2.21197  
  2.2127  
2.21352  
2.21539  
2.21611  
2.21828  
2.21855  
  2.2186  
2.21941  
2.22042  
2.22109  
2.22145  
2.22649  
2.22676  
  2.227  
2.22722  
2.22732  
2.22855  
2.22989  
  2.2306  
2.23165  
2.23345  
2.23549  
  2.2364  
2.23754  
  2.2384  
2.24121  
  2.2415  
2.24196  
2.24228  
2.24256  
2.24284  
2.24305  
2.24535  
2.24642  
2.24653  
2.24822  
2.24826  
2.24858  
2.24908  
  2.2493  
2.24977  
2.25207  
2.25221  
2.25267  
2.25449  
  2.256  
2.25721  
2.25728  
2.25731  
2.25749  
2.25945

2.26067  
2.26099  
2.26313  
2.26335  
2.2639  
2.26548  
2.26582  
2.26586  
2.26641  
2.26724  
2.2683  
2.26883  
2.27001  
2.27014  
2.27077  
2.27195  
2.27318  
2.27357  
2.27436  
2.27532  
2.27549  
2.27719  
2.27881  
2.27908  
2.27946  
2.27985  
2.28003  
2.28077  
2.28183  
2.2843  
2.28489  
2.28512  
2.28552  
2.28649  
2.28816  
2.28839  
2.29071  
2.29294  
2.2935  
2.2949  
2.2956  
2.29717  
2.29742  
2.29757  
2.2979  
2.29799  
2.2992  
2.30026  
2.30082  
2.30127  
2.30183  
2.30253  
2.30405

2.3046  
2.30515  
2.30591  
2.30609  
2.30852  
2.30856  
2.31045  
2.31059  
2.31119  
2.31647  
2.31651  
2.31713  
2.31812  
2.31815  
2.31847  
2.32045  
2.32061  
2.32183  
2.32333  
2.32403  
2.32445  
2.32609  
2.32761  
2.32871  
2.32896  
2.32955  
2.3299  
2.33365  
2.33782  
2.33842  
2.33948  
2.34081  
2.34247  
2.34265  
2.34583  
2.34656  
2.34664  
2.34752  
2.34891  
2.34948  
2.35044  
2.35534  
2.36138  
2.3614  
2.36157  
2.36184  
2.36346  
2.36349  
2.36349  
2.36362  
2.36639  
2.36702  
2.36724

2.36841  
2.36942  
2.37158  
2.37319  
2.37351  
2.37396  
2.37515  
2.37529  
2.37765  
2.37853  
2.37972  
2.38007  
2.38177  
2.38315  
2.3835  
2.38384  
2.38782  
2.38807  
2.3883  
2.39067  
2.39252  
2.39318  
2.39783  
2.39959  
2.39983  
2.40001  
2.40111  
2.40486  
2.40527  
2.40537  
2.40784  
2.40992  
2.411  
2.41133  
2.41277  
2.41529  
2.41697  
2.41725  
2.41926  
2.41943  
2.42173  
2.42299  
2.42416  
2.42583  
2.42827  
2.42829  
2.42952  
2.43006  
2.43083  
2.43083  
2.43192  
2.43339  
2.4372

2.43778  
2.43812  
2.43913  
2.44285  
  2.4436  
2.44527  
2.44529  
2.44638  
2.45023  
2.45113  
2.45139  
2.45268  
2.45315  
2.45653  
2.45706  
2.45753  
  2.4583  
2.46134  
  2.462  
2.46211  
2.46215  
2.46218  
2.46263  
2.46266  
2.46268  
2.46426  
  2.4669  
2.46725  
2.46908  
2.46974  
2.47353  
2.47532  
2.47672  
2.47723  
2.47842  
2.47895  
2.47974  
2.48028  
2.48056  
2.48268  
2.48345  
2.48449  
2.48576  
  2.4861  
2.48687  
2.48771  
2.48797  
2.49023  
2.49097  
  2.4911  
2.49212  
2.49281  
2.49369

2.49497  
2.49521  
2.49757  
2.49798  
2.5034  
2.50484  
2.50507  
2.50614  
2.50657  
2.50911  
2.51021  
2.51036  
2.51334  
2.51335  
2.5153  
2.51962  
2.52394  
2.52422  
2.52542  
2.52714  
2.5275  
2.52798  
2.52905  
2.53005  
2.53185  
2.53379  
2.53487  
2.53492  
2.53651  
2.53939  
2.54211  
2.54907  
2.55028  
2.55143  
2.55183  
2.55208  
2.55475  
2.55476  
2.55631  
2.55812  
2.55963  
2.56304  
2.56466  
2.56556  
2.56626  
2.56904  
2.57444  
2.57465  
2.57476  
2.57559  
2.5762  
2.57975  
2.58234



2.58239  
2.58445  
2.58553  
2.58794  
2.59021  
  2.5913  
2.59602  
2.59688  
2.59796  
2.60368  
2.61076  
  2.6125  
2.61456  
2.61781  
2.61809  
2.62271  
2.62317  
2.62343  
2.62571  
2.62749  
  2.6331  
2.63355  
2.63361  
2.63529  
2.63689  
2.63912  
2.64135  
2.64384  
2.64521  
2.64633  
2.64647  
2.64684  
2.65042  
2.65173  
2.65448  
2.65908  
2.66102  
2.66284  
2.66777  
2.66943  
  2.6703  
2.67272  
  2.6731  
  2.674  
  2.6745  
2.67774  
2.68769  
  2.6952  
2.70324  
2.70648  
2.71063  
2.71245  
2.72047

2.72198  
2.72419  
2.72652  
2.73306  
  2.7358  
2.73676  
2.73987  
2.74029  
2.74046  
2.74067  
2.74105  
2.74138  
2.74595  
2.74669  
2.74701  
2.74791  
2.75149  
2.75192  
2.75279  
2.75373  
2.75443  
2.75446  
2.75589  
  2.7607  
2.76793  
2.77281  
2.77752  
2.78576  
2.78592  
2.78702  
2.78742  
2.78791  
2.79333  
2.79351  
  2.8026  
2.80396  
2.80932  
2.80946  
2.81006  
2.81013  
2.81093  
2.81138  
2.82226  
2.82812  
2.82924  
2.83081  
2.84018  
2.84088  
2.84123  
2.84461  
  2.8456  
2.85034  
2.85132

2.85185  
2.85301  
2.85317  
2.85593  
2.85846  
2.85944  
2.86123  
2.87524  
2.87528  
2.8753  
2.87618  
2.87804  
2.87831  
2.8787  
2.88839  
2.9004  
2.90488  
2.90624  
2.91088  
2.91211  
2.91942  
2.92195  
2.92502  
2.92519  
2.93545  
2.93766  
2.9411  
2.94443  
2.94525  
2.95047  
2.95178  
2.95474  
2.95644  
2.9618  
2.97086  
2.97838  
2.98598  
2.98721  
2.98761  
2.99106  
2.99645  
3.00155  
3.00475  
3.005  
3.00503  
3.00649  
3.00743  
3.01291  
3.0156  
3.02097  
3.02108  
3.02171  
3.02699

3.02709  
3.03183  
3.03361  
3.03461  
3.04402  
3.05365  
3.0562  
3.0584  
3.05946  
3.0601  
3.06052  
3.06147  
3.0622  
3.06873  
3.06946  
3.07577  
3.07868  
3.08014  
3.08466  
3.08577  
3.08632  
3.08655  
3.09282  
3.09298  
3.09981  
3.10124  
3.10342  
3.10775  
3.11572  
3.12489  
3.12607  
3.12701  
3.14909  
3.15043  
3.15477  
3.15711  
3.16309  
3.16909  
3.17353  
3.17379  
3.18001  
3.18296  
3.19383  
3.197  
3.19929  
3.20099  
3.20514  
3.20586  
3.21036  
3.21191  
3.21789  
3.22177  
3.22199

3.23091  
3.23646  
3.23874  
3.24096  
3.24703  
3.25046  
3.25222  
3.25253  
3.25635  
3.25833  
3.25929  
3.26148  
3.26275  
3.27399  
3.29029  
3.30122  
3.30394  
3.30715  
3.31203  
3.31347  
3.31629  
3.31843  
3.32425  
3.32428  
3.32439  
3.32785  
3.33176  
3.33401  
3.33801  
3.33805  
3.33924  
3.34228  
3.34279  
3.34673  
3.34897  
3.35721  
3.3614  
3.36481  
3.37269  
3.38005  
3.38841  
3.39025  
3.39214  
3.40385  
3.40419  
3.40667  
3.40692  
3.41104  
3.4318  
3.43226  
3.43666  
3.43795  
3.43839

3.43854  
3.43954  
3.44961  
3.45535  
3.46014  
3.46915  
3.4813  
3.48218  
3.48854  
3.49076  
3.4957  
3.50318  
3.50502  
3.5091  
3.5186  
3.52016  
3.52674  
3.53351  
3.55038  
3.55886  
3.5595  
3.56013  
3.56965  
3.57038  
3.57109  
3.5718  
3.57188  
3.57879  
3.58425  
3.58445  
3.58862  
3.5943  
3.59579  
3.61853  
3.61853  
3.61947  
3.61996  
3.62569  
3.62949  
3.6318  
3.63306  
3.63475  
3.63761  
3.63811  
3.6401  
3.64761  
3.66885  
3.67708  
3.67755  
3.68064  
3.69375  
3.69845  
3.69858

3.70346  
3.70746  
3.71946  
3.72566  
3.73459  
3.73929  
3.74119  
3.74257  
3.76174  
3.7659  
3.79644  
3.7978  
3.79969  
3.80973  
3.81315  
3.8178  
3.81833  
3.81984  
3.82128  
3.82461  
3.84055  
3.85637  
3.8597  
3.86012  
3.86337  
3.86406  
3.86583  
3.86944  
3.87186  
3.87932  
3.88082  
3.8858  
3.89001  
3.89556  
3.90353  
3.90707  
3.90919  
3.91655  
3.92546  
3.92713  
3.93333  
3.93763  
3.94651  
3.95095  
3.96146  
3.9723  
4.00503  
4.01678  
4.01778  
4.02267  
4.02504  
4.03448  
4.03762

4.05392  
4.05459  
4.0669  
4.09441  
4.10854  
4.10902  
4.11107  
4.1134  
4.12141  
4.1304  
4.13121  
4.14116  
4.15252  
4.1606  
4.17003  
4.17304  
4.18066  
4.18902  
4.20321  
4.20333  
4.2104  
4.21297  
4.21614  
4.21897  
4.22124  
4.23621  
4.24009  
4.24216  
4.24266  
4.25709  
4.32033  
4.32081  
4.33568  
4.33775  
4.34824  
4.37329  
4.38779  
4.39137  
4.40295  
4.40599  
4.41844  
4.42981  
4.43652  
4.45398  
4.45417  
4.45775  
4.46641  
4.47507  
4.4782  
4.49619  
4.49895  
4.5049  
4.50762



4.52829  
4.53734  
4.5443  
4.57198  
4.58297  
4.6049  
4.60568  
4.60922  
4.6336  
4.63483  
4.63533  
4.66113  
4.67723  
4.70329  
4.71916  
4.73611  
4.75387  
4.76039  
4.76316  
4.76678  
4.77773  
4.78126  
4.80194  
4.81494  
4.82484  
4.8357  
4.84606  
4.85354  
4.8754  
4.89693  
4.89797  
4.9182  
4.93502  
4.94995  
4.97375  
4.98605  
5.01924  
5.04281  
5.05591  
5.09354  
5.09862  
5.11872  
5.1325  
5.19104  
5.23226  
5.23376  
5.24556  
5.26421  
5.27347  
5.2878  
5.30001  
5.37134  
5.3826

5.38705  
5.40591  
5.40733  
5.42351  
5.52736  
5.53302  
5.56331  
5.57658  
5.60115  
5.60884  
5.61127  
5.70078  
5.71567  
5.72183  
5.7492  
5.82891  
5.9268  
5.95129  
5.96622  
5.9978  
6.06919  
6.07313  
6.08799  
6.10189  
6.11985  
6.12485  
6.15205  
6.17566  
6.17664  
6.18932  
6.25267  
6.2683  
6.26925  
6.31661  
6.35025  
6.35477  
6.36704  
6.39327  
6.4199  
6.42602  
6.42803  
6.4913  
6.65791  
6.68226  
6.82445  
6.83389  
6.85104  
6.88172  
6.92372  
6.92679  
6.99715  
7.02108  
7.04136

7.07765  
7.08082  
7.09189  
7.13954  
7.19629  
7.33732  
7.34368  
7.35  
7.41892  
7.46982  
7.48814  
7.49371  
7.5191  
7.57726  
7.63734  
7.71117  
7.74057  
7.75896  
7.89105  
8.03414  
8.03794  
8.07312  
8.09243  
8.09359  
8.24567  
8.27321  
8.28116  
8.30222  
8.40299  
8.40377  
8.42652  
8.431  
8.4768  
8.47768  
8.52938  
8.65324  
8.99465  
9.12175  
9.12208  
9.32168  
9.48986  
9.5853  
9.87474  
9.98851  
10.0547  
10.1989  
10.2047  
10.2134  
10.3288  
10.468  
10.6899  
10.7407  
10.7504

10.796  
11.042  
11.2171  
11.2419  
11.2452  
11.2687  
11.3176  
11.3474  
11.5471  
11.6892  
12.001  
12.2053  
12.3556  
12.839  
12.9173  
13.5052  
13.5891  
14.2543  
14.2769  
14.4198  
14.5385  
14.6874  
14.713  
14.7498  
14.8613  
15.2709  
15.3071  
15.9286  
16.1489  
16.6359  
16.8944  
17.1921  
18.3966  
18.5195  
19.0371  
19.1985  
19.2896  
20.0777  
20.6066  
20.7602  
22.0594  
22.8261  
22.8881  
23.725  
25.2137  
27.4446  
27.7906  
32.0763  
32.2392  
33.0075  
33.2271  
34.179  
49.2529

51.3398  
51.6297  
51.7477  
74.5817
